# Supplementary material for: Seeking the source of Pseudomonas aeruginosa infections in a recently opened hospital: an observational study using whole-genome sequencing
Source: PubMed Central journal article supplement — BMJ Open. 2014 Nov 4;4(11):e006278. doi: 10.1136/bmjopen-2014-006278 (PMC4225241; doi:10.1136/bmjopen-2014-006278), 2014-11-04
Supplement: bmjopen-2014-006278.draft_revisions.pdf [file bmjopen-2014-006278.draft_revisions.pdf]

# BMJ Open

## Seeking the source of *Pseudomonas aeruginosa* infections in a recently opened hospital: a role for whole-genome sequencing

|                                 |                                                                                                                                                                                                                                                                                                                                                                                                                                                                                                                                                                                                                                                                                                                                                                                                                                                                                                                                                                                                                                                                                                                                                                                                                                                                                                                                                                                                       |
|---------------------------------|-------------------------------------------------------------------------------------------------------------------------------------------------------------------------------------------------------------------------------------------------------------------------------------------------------------------------------------------------------------------------------------------------------------------------------------------------------------------------------------------------------------------------------------------------------------------------------------------------------------------------------------------------------------------------------------------------------------------------------------------------------------------------------------------------------------------------------------------------------------------------------------------------------------------------------------------------------------------------------------------------------------------------------------------------------------------------------------------------------------------------------------------------------------------------------------------------------------------------------------------------------------------------------------------------------------------------------------------------------------------------------------------------------|
| Journal:                        | <i>BMJ Open</i>                                                                                                                                                                                                                                                                                                                                                                                                                                                                                                                                                                                                                                                                                                                                                                                                                                                                                                                                                                                                                                                                                                                                                                                                                                                                                                                                                                                       |
| Manuscript ID:                  | bmjopen-2014-006278                                                                                                                                                                                                                                                                                                                                                                                                                                                                                                                                                                                                                                                                                                                                                                                                                                                                                                                                                                                                                                                                                                                                                                                                                                                                                                                                                                                   |
| Article Type:                   | Research                                                                                                                                                                                                                                                                                                                                                                                                                                                                                                                                                                                                                                                                                                                                                                                                                                                                                                                                                                                                                                                                                                                                                                                                                                                                                                                                                                                              |
| Date Submitted by the Author:   | 01-Aug-2014                                                                                                                                                                                                                                                                                                                                                                                                                                                                                                                                                                                                                                                                                                                                                                                                                                                                                                                                                                                                                                                                                                                                                                                                                                                                                                                                                                                           |
| Complete List of Authors:       | Quick, Josh; Institute of Microbiology and Infection, University of Birmingham; Queen Elizabeth Hospital, NIHR Surgical Reconstruction and Microbiology Research Centre<br>Cumley, Nicola; Queen Elizabeth Hospital, NIHR Surgical Reconstruction and Microbiology Research Centre<br>Wearn, Chris; University Hospital Birmingham Foundation Trust, Healing Foundation Centre for Burns Research; Queen Elizabeth Hospital, NIHR Surgical Reconstruction and Microbiology Research Centre<br>Niebel, Marc; Queen Elizabeth Hospital, NIHR Surgical Reconstruction and Microbiology Research Centre<br>Constantinidou, Chrystala; University of Warwick, Division of Microbiology and Immunology<br>Pallen, Mark; University of Warwick, Division of Microbiology and Immunology<br>Moiemen, Naiem; Queen Elizabeth Hospital, NIHR Surgical Reconstruction and Microbiology Research Centre; University Hospital Birmingham Foundation Trust, Healing Foundation Centre for Burns Research<br>Bamford, Amy; Queen Elizabeth Hospital, NIHR Surgical Reconstruction and Microbiology Research Centre; University Hospital Birmingham Foundation Trust, Healing Foundation Centre for Burns Research<br>Oppenheim, Beryl; Queen Elizabeth Hospital, NIHR Surgical Reconstruction and Microbiology Research Centre<br>Loman, Nicholas; University of Birmingham, Institute of Microbiology and Infection |
| <b>Primary Subject Heading</b>: | Genetics and genomics                                                                                                                                                                                                                                                                                                                                                                                                                                                                                                                                                                                                                                                                                                                                                                                                                                                                                                                                                                                                                                                                                                                                                                                                                                                                                                                                                                                 |
| Secondary Subject Heading:      | Infectious diseases, Pathology, Public health, Surgery                                                                                                                                                                                                                                                                                                                                                                                                                                                                                                                                                                                                                                                                                                                                                                                                                                                                                                                                                                                                                                                                                                                                                                                                                                                                                                                                                |
| Keywords:                       | Microbiology < BASIC SCIENCES, BIOTECHNOLOGY & BIOINFORMATICS, Molecular diagnostics < INFECTIOUS DISEASES, Infection control < INFECTIOUS DISEASES, MICROBIOLOGY, Plastic & reconstructive surgery < SURGERY                                                                                                                                                                                                                                                                                                                                                                                                                                                                                                                                                                                                                                                                                                                                                                                                                                                                                                                                                                                                                                                                                                                                                                                         |

1  
2  
3  
4  
5  
6  
7  
8  
9  
10  
11  
12  
13  
14  
15  
16  
17  
18  
19  
20  
21  
22  
23  
24  
25  
26  
27  
28  
29  
30  
31  
32  
33  
34  
35  
36  
37  
38  
39  
40  
41  
42  
43  
44  
45  
46  
47  
48  
49  
50  
51  
52  
53  
54  
55  
56  
57  
58  
59  
60

For peer review only

**Title**

Seeking the source of *Pseudomonas aeruginosa* infections in a recently opened hospital: a role for whole-genome sequencing

**Authors**

Joshua Quick<sup>1,2\*</sup>, Nicola Cumley<sup>2\*</sup>, Chris M. Wearn<sup>2,3</sup>, Marc Niebel<sup>2</sup>, Chrystala Constantinidou<sup>4</sup>, Mark J. Pallen<sup>4</sup>, Naiem S. Moiemmen<sup>2,3</sup>, Amy Bamford<sup>2,3</sup>, Beryl Oppenheim<sup>2#</sup>, Nicholas J. Loman<sup>1#</sup>

**Affiliations**

<sup>1</sup>Institute of Microbiology and Infection, University of Birmingham, Birmingham, United Kingdom

<sup>2</sup>NIHR Surgical Reconstruction and Microbiology Research Centre, Queen Elizabeth Hospital, Birmingham, United Kingdom

<sup>3</sup>Healing Foundation Centre for Burns Research, University Hospital Birmingham Foundation Trust, Birmingham, United Kingdom

<sup>4</sup>Division of Microbiology and Immunology, University of Warwick, Warwick, United Kingdom

\*Contributed equally

**Correspondence:**

Dr Nicholas James Loman

Institute of Microbiology and Infection, University of Birmingham, Birmingham, B15 2TT United Kingdom

1  
2  
3 Telephone: +44 (0) 121 414 8849  
4  
5

6 Email: [n.j.loman@bham.ac.uk](mailto:n.j.loman@bham.ac.uk)  
7  
8

9 Dr Beryl Oppenheim  
10

11  
12 Clinical Microbiology, University Hospitals Birmingham NHS Foundation Trust  
13

14 Queen Elizabeth Hospital Birmingham, Mindelsohn Way, Edgbaston  
15

16 Birmingham, B15 2WB  
17

18  
19  
20 Telephone: +44 (0) 121 371 6523  
21

22 Email: [Beryl.Oppenheim@uhb.nhs.uk](mailto:Beryl.Oppenheim@uhb.nhs.uk)  
23  
24

25 **Keywords**  
26

27  
28 High-Throughput DNA sequencing; Pseudomonas aeruginosa; Burns, Hydrotherapy  
29  
30

31 **Word Count**  
32

33 4265  
34  
35  
36  
37  
38  
39  
40  
41  
42  
43  
44  
45  
46  
47  
48  
49  
50  
51  
52  
53  
54  
55  
56  
57  
58  
59  
60

## ABSTRACT

### Objectives

*Pseudomonas aeruginosa* is a common nosocomial pathogen responsible for significant morbidity and mortality internationally. Patients may become colonised or infected with *P. aeruginosa* after exposure to contaminated sources within the hospital environment. The aim of this study was to determine whether whole-genome sequencing (WGS) can be used to determine the source in a cohort of burns patients at high risk of *P. aeruginosa* acquisition.

### Study design

An observational prospective cohort study.

### Setting

Burns care ward and critical care ward in the United Kingdom.

### Participants

Patients with >7% total burns by surface area were recruited into the study.

### Methods

All patients were screened for *P. aeruginosa* on admission and samples taken from their immediate environment, including water. Screening patients who subsequently developed a positive *P. aeruginosa* microbiology result were subject to enhanced environmental surveillance. All isolates of *P. aeruginosa* were whole-genome sequenced. Sequence analysis looked at similarity and relatedness between isolates.

### Results

1  
2  
3 Whole-genome sequences for 141 *P. aeruginosa* isolates were obtained from  
4 patients, hospital water and the ward environment. Phylogenetic analysis revealed  
5 eight distinct clades, with a single clade representing the majority of environmental  
6 isolates in the burns unit. Isolates from three patients had identical genotypes  
7 compared with water isolates from the same room. There was clear clustering of  
8 water isolates by room and outlet, allowing the source of acquisitions to be  
9 unambiguously identified. Whole-genome shotgun sequencing of biofilm DNA  
10 extracted from a thermostatic mixer valve revealed this was the source of a *P.*  
11 *aeruginosa* subpopulation previously detected in water. In the remaining two cases  
12 there was no clear link to the hospital environment.  
13  
14  
15  
16  
17  
18  
19  
20  
21  
22  
23  
24

## 25 **Conclusions**

26  
27  
28 This study reveals that WGS can be used for source tracking of *P. aeruginosa* in a  
29 hospital setting, and that acquisitions can be traced to a specific source within a  
30 hospital ward.  
31  
32  
33  
34  
35  
36  
37  
38  
39  
40  
41  
42  
43  
44  
45  
46  
47  
48  
49  
50  
51  
52  
53  
54  
55  
56  
57  
58  
59  
60

## ARTICLE SUMMARY

### Strengths and limitations of the study

- We have demonstrated that whole-genome sequencing can be used for source tracking of *P. aeruginosa* in a hospital setting.
- We show convincing evidence that transmission has occurred directly from water to patients, but other routes are as likely.
- The main limitation of the study was the sample size, which could be attributable to interventions being carried out during the study.
- Our study focused on a burns unit and critical care unit in a newly built hospital. Modes of *P. aeruginosa* transmission may be different in hospitals with different styles of plumbing and on other augmented care units.

## INTRODUCTION

*Pseudomonas aeruginosa* is a ubiquitous Gram-negative bacterium and an important opportunistic pathogen in the healthcare setting. *P. aeruginosa* particularly affects those with impaired host or mucosal immunity and has a broad range of presentations including respiratory infections in cystic fibrosis and mechanically ventilated patients, bloodstream infections in premature neonates and wounds in burns injuries. Nosocomial *P. aeruginosa* outbreaks are frequently reported and associated with water sources such as taps, showers, mixer valves and flow straighteners, sink traps and drains.[1-10] Other potential routes of transmission include cross-infection, for example carriage on the hands of health care workers, and through contaminated medical equipment such as endoscopic devices.[3,5]

In the UK, the role of water in the transmission of *P. aeruginosa* in healthcare settings has become a matter of urgent concern in response to a recent high-profile outbreak affecting a neonatal critical care unit in Belfast in 2012.[11] This source was eventually determined to be sink taps.[11-13] National guidance is now in place detailing enhanced procedures for routine water sampling on augmented care units, with directed interventions such as disinfection and replacement of high-risk plumbing parts required.[14]

Historical phenotypic typing methods for *P. aeruginosa* such as O-antigen serotyping have more recently been replaced by molecular typing methods such as pulsed-field gel electrophoresis (PFGE), variable number tandem repeat analysis (VNTR) and random amplification of polymorphic DNA (RAPD) and multi-locus sequencing typing (MLST). These methods have been used to investigate outbreaks of *P. aeruginosa* within hospitals.[4,15-17] However, such techniques have important limitations for



1  
2  
3 source tracking of infections in hospitals as they sample limited numbers of sites in  
4  
5 the genome which may result in false clustering of unrelated strains.[18] In the past  
6  
7 five years, whole-genome sequencing (WGS) has started to be used to investigate  
8  
9 outbreaks in hospitals. WGS is attractive because of its digital, sharable format and  
10  
11 ultra-high resolution which is able to discriminate two isolates differing by just a  
12  
13 single mutation. WGS has been successfully used to determine likely transmission  
14  
15 chains during outbreaks of *Staphylococcus aureus*, *Acinetobacter baumannii* and  
16  
17 *Klebsiella pneumoniae*. [18-20] Benchtop sequencing instruments now offer a cost-  
18  
19 effective approach for bringing bacterial WGS to the clinical environment. [1,21]  
20  
21

22  
23  
24 In this study, we explore the utility of WGS to determine the likely sources of *P.*  
25  
26 *aeruginosa* in an at-risk population of burns patients. In the UK and US burns  
27  
28 patients receive shower cart hydrotherapy as a mainstay of burns treatment.[22-25]  
29  
30 A previous hospital audit suggested that up to one-third of such patients became  
31  
32 colonised with *P. aeruginosa*. We hypothesised that this high rate of acquisition may  
33  
34 relate to transmission from hospital shower water during therapy. We therefore  
35  
36 wished to understand the importance of transmission from water compared with  
37  
38 alternative routes such as cross-infection and endogenous carriage.  
39  
40  
41  
42  
43  
44  
45  
46  
47  
48  
49  
50  
51  
52  
53  
54  
55  
56  
57  
58  
59  
60

## MATERIALS AND METHODS

### Hospital setting

An observational, prospective study design was employed in a burns centre serving approximately 13.7 million people across the Midlands region of England with 300 admissions annually. Opened in June 2010, the burns centre comprises a purpose built 15-bed ward with 11 side-rooms and 2 dual-bedded rooms. Patients requiring mechanical ventilation and organ support are usually treated in two self-contained burns cubicles located within the trauma critical care unit (CCU). Despite the observational nature of the study, sampling was carried out during implementation of interim national guidance on control of *P. aeruginosa* issued by the Department of Health. These guidelines were issued in draft form March 2012, and subsequently revised in March 2013. This meant that parallel water sampling and engineering interventions were being undertaken during the period of study. In addition, some enhanced infection prevention measures were also introduced in response to an outbreak of a multi-drug resistant *A. baumannii*.

### Study design and patient selection

Ethical approval was sought and received from the National Research Ethics Service committee in the West Midlands (reference number 12/WM/0181). Patients admitted to the burns unit were eligible for the screening phase of the study if they had burns injuries covering greater than 7% total body surface area (TBSA). Patients were screened as soon as possible after admission after they had given written informed consent. When appropriate, legal consultee advice was sought for patients lacking capacity due to emergency treatment. On admission, recruited patients were screened for carriage of *P. aeruginosa* (wounds, urine and stool) using standard

1  
2  
3 microbiology techniques. Samples were then taken as part of routine microbiology  
4 service during the patients stay. Environmental and water samples were taken after  
5 the patient was admitted to the burns centre. If during the period of stay *P.*  
6  
7  
8  
9  
10 *aeruginosa* was isolated from a patient sample the patient was recruited into the  
11 second phase of the study. In this phase, patients had wound swabs taken at each  
12 dressing change as well as twice-weekly urine samples. The patient's environment  
13 and water from outlets in their bed space were sampled weekly for the duration of  
14 their stay, and after discharge (post-cleaning). Termination of the study was planned  
15 after 30 screening patient admissions, or a year, whichever came soonest, after  
16 which 10 patients were expected to acquire *P. aeruginosa*.  
17  
18  
19  
20  
21  
22  
23  
24

### 25 26 **Microbiological and molecular methods**

27  
28  
29 *P. aeruginosa* isolates were obtained from wound swab, urine, stool, environmental  
30 and water samples. *P. aeruginosa* was isolated from wound swabs, urine and stool  
31 by inoculation onto cysteine lactose electrolyte deficient agar (CLED) and cetrimide  
32 agar and incubation for 24 hours at 37°C. Stool samples were cultured overnight in a  
33 cetrimide enrichment broth before subculture onto CLED. Identification was  
34 confirmed by resistance to C-390 and the VITEK® 2 GN identification card. Antibiotic  
35 sensitivity assays were performed using the VITEK® 2 AST N-210 card (bioMérieux,  
36 Basingstoke, UK).  
37  
38  
39  
40  
41  
42  
43  
44  
45  
46

47 The patient's environment (shower head rosette, drain, shower chair or trolley,  
48 bedside table, patient chair, instruments in contact with the patient) was sampled  
49 over a 10cm<sup>2</sup> area by a Polywipe™ sponge. The sponge was placed in tryptic soy  
50 broth incubated for 24 hours at 37°C then sub-cultured onto CLED and cetrimide  
51 agar. During water sampling, water was taken from the patient's shower, or tap if a  
52  
53  
54  
55  
56  
57  
58  
59  
60

1  
2  
3 shower was not present. In duplicate, 100ml of water was filtered through a 0.45  
4  
5 micron filter and the filters placed onto CLED plates and cetrimide agar. Plates were  
6  
7 incubated at 37°C for 48 hours and the number of organisms per 100ml quantified.  
8  
9

10 For storage and DNA extraction a single colony was purified from the primary culture  
11  
12 plate. When different colony morphologies were observed, a single colony from each  
13  
14 type was purified. Additionally, for a randomly selected water sample, 24 colonies  
15  
16 were individually picked from one water-filter primary microbiological plate for  
17  
18 sequencing. Isolates were stored on Biobank beads at -20°C prior to DNA extraction.  
19  
20 Organisms were resuscitated on CLED agar plates and genome DNA either  
21  
22 extracted directly using the MOBIO UltraClean Microbial DNA Kit, or from overnight  
23  
24 LB broth culture using a Qiagen Genomic-Tip 100G.  
25  
26  
27  
28

### 29 **DNA extraction and sequencing**

30  
31  
32 Genomic DNA was prepared from single colony picks using the MIOBIO Ultraclean  
33  
34 microbial kit (MOBIO, Carlsbad, USA). 1ng input DNA, as quantified by Qubit (Life  
35  
36 Technologies, Carlsbad, USA) was used to prepare genomic libraries for sequencing  
37  
38 using the Illumina Nextera XT™ DNA sample kit as per manufacturer's protocol  
39  
40 (Illumina, San Diego, USA). Libraries were sequenced on the Illumina MiSeq using a  
41  
42 paired-end protocol resulting in read lengths between 150 and 300 bases. A single  
43  
44 additional sample, isolate 910, was chosen as a representative member of Clade 5  
45  
46 for long-read sequencing. DNA from this sample was fragmented using a  
47  
48 Hydroshear (Digilab, Marlborough, MA) using the recommended protocol for 10kb  
49  
50 fragments and further size-selected on a Blue Pippin instrument (Sage Science,  
51  
52 MA) with a 7kb minimum size cut-off. The library was sequenced on two zero-mode  
53  
54 waveguides (ZMWs) using the Pacific Biosciences RS II instrument at the Norwegian  
55  
56  
57  
58  
59  
60

1  
2  
3 Sequencing Centre, Oslo. C4-P2 chemistry was chosen because it favours long,  
4  
5 more accurate reads for *de novo* assembly.  
6  
7

## 8 **Stool PCR**

9  
10 For detection of *P. aeruginosa* in stool samples using PCR, a stool sample was  
11  
12 collected into a stool collection tube containing stool DNA stabilizer. Total DNA was  
13  
14 extracted using the PSP Spin Stool DNA Plus kit (Strattec Molecular). PCR  
15  
16 amplification of species specific regions of the 16S rDNA gene was carried out using  
17  
18 primers PA-SS-F: GGGGGATCTTCGGACCTCA and PA-SS-R:  
19  
20 TCCTTAGAGTGCCACCCG [12] in the following conditions: 0.5µM of each primer,  
21  
22 1.5mM MgCl<sub>2</sub>, 0.2mM dNTP's using BIOTAQ™ DNA Polymerase and buffer set.  
23  
24 After initial denaturation at 96°C for 2 minutes, 30 cycles of 96°C for 30 seconds, 62°  
25  
26 C for 30 seconds and 72°C for 30 seconds were completed with a final extension of  
27  
28 72°C for 5 minutes. Products were visualised for size on an 1.5% agarose gel.  
29  
30  
31  
32  
33

## 34 **Bioinformatics methods**

35  
36  
37 Illumina MiSeq reads from each isolate were adapter and quality trimmed before use  
38  
39 with Trimmomatic.[26] Phylogenetic reconstruction of isolates sequenced in this  
40  
41 study were combined with data from a global collection of 55 *P. aeruginosa* strains  
42  
43 collected world-wide which have been previously analysed by Stewart et al. [27] For  
44  
45 each of the published strains, 600,000 paired-end reads were simulated from the  
46  
47 complete or draft genome assembly deposited in Genbank. Read sets were mapped  
48  
49 against the *P. aeruginosa* PAO1 reference genome using BWA-MEM 0.7.5a-r405  
50  
51 using default settings.[28] Single nucleotide polymorphisms were called using  
52  
53 VarScan 2.3.6 and filtered for regions with an excessive number of variants, which  
54  
55 may represent regions of recombination or strong Darwinian selection.[29] FastTree  
56  
57  
58  
59  
60

1  
2  
3 (version 2.1.7) was used for phylogenetic reconstruction. This software estimates an  
4  
5 approximate maximum-likelihood tree under the Jukes-Cantor model of nucleotide  
6  
7 evolution with a single rate for each site (CAT).[30] Trees were drawn in FigTree  
8  
9 (<http://tree.bio.ed.ac.uk/software/figtree/>).

10  
11  
12 For *in silico* MLST prediction, trimmed reads were assembled *de novo* using Velvet  
13  
14 [31] with a k-mer size of 81 and searched using nucleotide BLAST against the multi-  
15  
16 locus sequence database downloaded from the pubMLST website on 2013-08-05  
17  
18 (<http://pubmlst.org/paeruginosa/>). For Clade 5 isolates, in order to exhaustively  
19  
20 search for discriminatory mutations, a nearly complete reference genome was  
21  
22 generated by *de novo* assembly using Pacific Biosciences sequencing data. Reads  
23  
24 were assembled using the 'RS\_HGAP\_Assembly.3' pipeline within SMRT Portal  
25  
26 v2.2.0. Illumina reads from the same sample were mapped to this draft genome  
27  
28 assembly in order to correct remaining indel errors in the assembly using Pilon  
29  
30 (<http://www.broadinstitute.org/software/pilon/>). Isolates belonging to each clade were  
31  
32 mapped individually against either the PacBio reference (Clade 5) or *P. aeruginosa*  
33  
34 PAO1 (NC\_002516) (Clades 3, 4 and 7).

35  
36  
37 Variants (single nucleotide polymorphisms and short insertion-deletions) were called  
38  
39 using SAMtools mpileup and VarScan with an allele frequency threshold of 80%.[29]

40  
41  
42 Non-informative positions and regions of putative recombination were removed, the  
43  
44 later with a variant density filter of more than 3 SNPs every 1000 nucleotides.

45  
46  
47 Analysing samples in each clade individually maximised the number of variants  
48  
49 detected by reducing the likelihood of the position being uncovered by a subset of  
50  
51 samples. From these variants fine-grained phylogenetic trees were reconstructed for  
52  
53 each clade using FastTree. The scripts used to perform this analysis are available at  
54  
55  
56  
57  
58  
59  
60

1  
2  
3 [http://www.github.com/joshquicksnp\\_calling\\_scripts](http://www.github.com/joshquicksnp_calling_scripts). Approximate-maximum-  
4  
5 likelihood phylogenetic trees were generated using FastTree and FigTree. For  
6  
7 whole-genome shotgun metagenomics analysis, reads were analysed using the  
8  
9 Kraken taxonomic classifier software with the supplied *minikraken* database.[32]  
10  
11 Reads from the metagenomics dataset were aligned to *P. aeruginosa* PAO1 as in  
12  
13 the previous section and phylogenetic placement was carried out using pplacer in  
14  
15 conjunction with FastTree.[33] Sequence data is available from the European  
16  
17 Nucleotide Archive for the Illumina data (ERP006056) and the corrected Pacific  
18  
19 Biosciences assembly (ERP006058).  
20  
21

## 22 23 **RESULTS**

### 24 25 **Study results**

26  
27 Recruitment lasted a period of 300 days, ending according to protocol after the  
28  
29 enrolment of 30 screening patients. One additional eligible patient did not consent to  
30  
31 enter the study and was excluded. The average age in the study group was 41  
32  
33 years. Males predominated with a male-to-female ration of 2.3:1. Flame burns were  
34  
35 the most common mechanism of injury, followed by scalds and mixed flame/flash  
36  
37 injuries. The average burn size of the study group was 12.5% of the total body  
38  
39 surface area (TBSA) and 27% of patients sustained an inhalation injury. Eight  
40  
41 patients required admission to ITU and the majority required surgical treatment of  
42  
43 their burns with excision and skin grafting (80%). A large majority of the study group  
44  
45 (83%) received shower cart hydrotherapy as a routine part of their wound  
46  
47 management to encourage healing through wound debridement and  
48  
49 decontamination. The average length of hospital stay (LOS) was 17 days and taking  
50  
51 into account burn size, the average was 1.4 days per % TBSA.  
52  
53  
54  
55  
56  
57  
58  
59  
60

1  
2  
3 **The water and environment in burns and critical care units are frequently**  
4 **colonised by *P. aeruginosa***  
5  
6

7  
8 A total of 282 water and environmental samples were screened for *P. aeruginosa* of  
9  
10 which 39/78 (50%) were positive in water samples, 25/96 (26%) were positive from  
11  
12 the wet environment and 7/108 (6%) were positive from the dry environment. A total  
13  
14 of 83 genome sequences were generated from the 71 positive, as in some cases  
15  
16 multiple colony picks were sequenced. When placed in the context of a global  
17  
18 collection of *P. aeruginosa* strains, phylogenetic reconstruction demonstrated  
19  
20 isolates in our study fell into eight clades (figure 1, Panel A). As has been reported  
21  
22 previously, there was no strong association between ecological context and position  
23  
24 in the phylogenetic tree.[27] Isolates in this study are most closely related to strains  
25  
26 from a variety of settings. The majority of isolates (52%) belong to Clade E (figure 1  
27  
28 Panel B), whose nearest sequenced relative is the Liverpool Epidemic Strain, a  
29  
30 clone often isolated from patients in the UK and Canada with cystic fibrosis. [34,35]  
31  
32 Isolates from clade E were found in burns unit water and the ward environment, as  
33  
34 well as from two patient's wounds. However it was never detected in the critical care  
35  
36 unit. Clade E was detected throughout the study in a total of 10 different rooms  
37  
38 (figure 2).  
39  
40  
41  
42  
43

44 **Detection of potential transmission events by whole-genome sequencing**  
45

46  
47 Microevolutionary changes occurring over rapid time-scales (i.e. days to months)  
48  
49 have been used to detect potential chains of transmission in hospital and community  
50  
51 outbreaks.[18-20,36,37] The number of distinct mutations between given isolates  
52  
53 has been used to infer whether transmission events are likely to have occurred.  
54  
55 Such inferences are aided by prior knowledge of mutation rates in similar  
56  
57  
58  
59  
60



1  
2  
3 populations. Two patients (1 and 4) in our study both had *P. aeruginosa* from clade E  
4  
5 isolated from their wounds. These isolates had an indistinguishable genotype from  
6  
7 those present in water and the environment of the room they were nursed within  
8  
9 (figure 1 Panel C and figure 3). This genotype was detected in the patient's shower  
10  
11 water after initial patient screening, during screening of the second patient  
12  
13 admission, twice during the second patient's stay and then 127 days later (days 27,  
14  
15 65, 89 and 216 respectively). When water isolates were positive, the genotype was  
16  
17 also detected in wet environment sites (shower drain, shower rosette and patient's  
18  
19 trolley) on the same days.  
20  
21  
22  
23

24 Patient E was nursed on the critical care unit due to concomitant medical problems.  
25  
26 *P. aeruginosa* belonging to clade G was isolated from sputum during this time..  
27

28 Identical genotypes were detected contemporaneously in the water from the  
29  
30 associated sink and sink tap handle (see online supplementary appendix 4).  
31  
32  
33

34 Two further patients (patients 2 and 3) were positive for *P. aeruginosa*. Isolates from  
35  
36 these patients belonged to clades C and D respectively. Neither clade was ever  
37  
38 isolated from hospital water. In both cases, identical genotypes were detectable in  
39  
40 the environment associated with the patient but these were not detected before or  
41  
42 after the patients' stay, indicating that the environment was not persistently  
43  
44 contaminated. During the course of patient 3's stay, the dry environment such as the  
45  
46 bedside table was contaminated, as was the patient's door handle and shower chair.  
47  
48 However, after patient discharge, the strain associated with this patient was never  
49  
50 seen again during the course of the study in any location.  
51  
52  
53  
54

55 **Whole-genome sequencing permits source tracking of *P. aeruginosa* to**  
56  
57 **individual water outlets**  
58  
59  
60

1  
2  
3 Whole-genome sequencing has been reported previously for source tracking, but  
4  
5 never for the detection of transmission events from hospital water.[38] Phylogenetic  
6  
7 reconstruction within Clade E, the most commonly detected water clone  
8  
9 demonstrated additional diversity within this clone, with a total of 46 mutations  
10  
11 detected an average genetic distance between isolates of 4.1 mutations (figure 3).  
12  
13 The reconstruction demonstrated clear evidence of clustering of genotypes both by  
14  
15 room and outlet (figure 3). When *P. aeruginosa* was detected in the wet environment  
16  
17 (e.g. shower rosettes and drains) these genotypes were most often identical to those  
18  
19 found in water, indicating that the water was likely the ultimate source of that clone.  
20  
21 Genotypic variation was seen between outlets within the same room. For example,  
22  
23 tap water sampled from room 11 had a distinct genotype from that sampled from  
24  
25 shower water in the same room and this was consistently found over multiple  
26  
27 samplings. Notably, isolates from two patients fell within the cluster originating from  
28  
29 shower water, indicating that shower hydrotherapy was the most likely source of  
30  
31 infection. Two plasmids (designated pBURNS1 and pBURNS2) were detected in this  
32  
33 study set, which both demonstrated geographical clustering, with pBURNS1 only  
34  
35 being detectable in isolates from room 8 and pBURNS2 only being detectable in  
36  
37 isolates from the shower water in room 9.  
38  
39  
40  
41  
42  
43

#### 44 **Rapid evolution of antibiotic resistance associated with treatment**

45  
46 *P. aeruginosa* is commonly associated with antibiotic resistance due to a number of  
47  
48 predisposing features including intrinsic resistance, a repertoire of efflux pumps,  
49  
50 antibiotic-inactivating enzymes including beta-lactamases and natural  
51  
52 transformability. [39] Three infected patients (2, 3 and 5) received antibiotic therapy,  
53  
54 and in each case this was associated with the development of resistance to at least  
55  
56  
57  
58  
59  
60

1  
2  
3 one therapeutic agent. Associated mutations were detected that were either partially  
4  
5 or fully explanatory of the phenotype.  
6  
7

8 Patient 2 was treated with ciprofloxacin, nitrofurantoin and vancomycin (see online  
9  
10 supplementary appendix 11 for full details). 8/21 (38%) tested isolates from this  
11  
12 patient were ciprofloxacin resistant. 7/8 isolates (88%) of the ciprofloxacin-resistant  
13  
14 strains were distinguishable from the other isolates by a single SNP in *mexS*  
15  
16 (annotated as PA2491 in *P. aeruginosa* PAO1) (see online supplementary appendix  
17  
18 1 and 7). This SNP was predicted to result in a non-synonymous amino acid  
19  
20 substitution. Disruption of this gene has been shown to cause increased expression  
21  
22 of the mexEF-oprN multidrug efflux pump, associated with resistance to  
23  
24 quinolones.[40]  
25  
26  
27  
28

29 Patient 4 was treated with meropenem, piperacillin/tazobactam, flucloxacillin and  
30  
31 colistin. Five isolates collected 10 to 18 days after initiation of meropenem showed  
32  
33 resistance to imipenem and intermediate resistance to meropenem (see online  
34  
35 supplementary appendix 3 and 9). The most likely mutation responsible for this  
36  
37 phenotype was detectable in two isolates, both of which had a frame-shift mutation in  
38  
39 the gene coding for the membrane porin *oprD*. [41]  
40  
41  
42  
43

44 Patient 5 had a prolonged stay in ITU and had multiple medical problems including  
45  
46 *A. baumannii* infection and was treated with nine antibiotic agents including  
47  
48 ciprofloxacin, meropenem and piperacillin-tazobactam. Serial isolates from this  
49  
50 patient demonstrated the stepwise acquisition of two mutations. The first was in  
51  
52 *nalC*, a probable repressor of the TetR/AcrR family (see online supplementary  
53  
54 appendix 10). [42] On inspection of the sequence alignment in this region, a large  
55  
56 deletion of 196 nucleotide bases was seen compared to the reference PAO1 strain.  
57  
58  
59  
60

1  
2  
3 This mutation was seen in association with full resistance to piperacillin-tazobactam,  
4  
5 ceftazidime, aztreonam, meropenem and intermediate resistance to ciprofloxacin.  
6

7 This deletion is likely to result in over-expression of efflux pumps involving the  
8  
9 *mexAB-oprM* operon. [42,43] Ciprofloxacin resistance in a later isolate corresponded  
10  
11 to the stepwise acquisition of a second mutation. This mutation is predicted to affect  
12  
13 the well-studied DNA gyrase subunit A gene (*gyrA*) which is strongly associated with  
14  
15 ciprofloxacin resistance.[44]  
16  
17

### 18 19 **Confirmation of *P. aeruginosa* genotypes in biofilms by whole-genome** 20 21 **metagenomic shotgun sequencing** 22 23

24 *P. aeruginosa* is able to produce and survive in biofilms. Plumbing parts such as flow  
25  
26 straighteners, shower rosettes, flexible hoses, solenoid valves and thermostatic  
27  
28 mixer valves (TMV) are particularly at risk of biofilm formation due to factors  
29  
30 including surface areas, convoluted designs and inadequate pasteurisation. [45] To  
31  
32 confirm the presence of *P. aeruginosa* in water fittings associated with rooms on the  
33  
34 burns unit, we obtained a TMV removed by the hospital estates team from the  
35  
36 shower in room nine as part of compliance with UK guidelines for managing *P.*  
37  
38 *aeruginosa* in hospitals. On visual inspection, a biofilm was present which was  
39  
40 scraped from the surface with a sterile scalpel. DNA from this biofilm was extracted  
41  
42 for whole-genome shotgun sequencing. The majority of reads did not map to any  
43  
44 known bacterial taxa. The most abundant taxon identified was *Pseudomonas*  
45  
46 *aeruginosa* (3%). Subsequent alignment to the *P. aeruginosa* PAO1 reference  
47  
48 genome covered 94% of the 6.3 million base reference genome at a median coverage of 5x,  
49  
50 confirming that reads were correctly classified to this species and not other  
51  
52 environmental *Pseudomonas* species. Alignment to the *P. aeruginosa* clade E  
53  
54 reference genome followed by phylogenetic placement of reads demonstrated that it  
55  
56  
57  
58  
59  
60

1  
2  
3 fell into the same clade as previously recovered isolates from the shower or tap in  
4  
5 room 9 (indicated on figure 3, and in online supplementary appendix 6).  
6  
7

## 8 **DISCUSSION**

9  
10 The hospital environment has been intimately linked with *P. aeruginosa* infection for  
11  
12 over 50 years yet hospital acquisitions, clusters and outbreaks remain a common  
13  
14 occurrence and understanding precise routes of transmission can be difficult. [45,46]  
15

16  
17 Our results demonstrate that, even in a new hospital, *P. aeruginosa* can become  
18  
19 rapidly endemic in hospital plumbing. Furthermore, by linking *P. aeruginosa*  
20  
21 genotypes recovered from patients to specific individual water outlets, we offer  
22  
23 compelling evidence of unidirectional transmission from water to patients. Further, by  
24  
25 sequencing of a biofilm identified in a TMV from a hospital water system, we can  
26  
27 identify the likely common source of genotypes found in water and in the hospital  
28  
29 environment.  
30  
31  
32

33  
34 Our results suggest that use of whole-genome sequencing can reduce ambiguity  
35  
36 about potential transmission events in hospitals and consequently inform infection  
37  
38 prevention efforts about the direction and sequence of transmission. It is notable that  
39  
40 the burns unit was colonised by a single clone, meaning that it was very unlikely that  
41  
42 water outlets at each bed space were colonised as a result of transmissions from the  
43  
44 patient or environment. For this to happen would require multiple transmission  
45  
46 events from separate patients with the same clone, for which there is not evidence.  
47  
48 Instead we speculate that this clone was introduced to the hospital associated with  
49  
50 its commissioning. One hypothesis is that particular plumbing fittings, i.e. the TMV  
51  
52 may have been colonised simultaneously by a clone circulating in water. Clone E  
53  
54 (ST395) has been frequently reported associated with water, so this remains a  
55  
56  
57  
58  
59  
60

1  
2  
3 possibility. [47,48] However, it is possible that plumbing fittings are installed 'pre-  
4  
5 seeded' with *P. aeruginosa* as has already been proposed by Kelsey.[3,5,45]

6  
7 Investigation of an outbreak in Wales implicated new plumbing parts as a potential  
8  
9 source of *P. aeruginosa*. New plumbing components are often tested by companies  
10  
11 prior to their supply and it is possible they were contaminated prior to distribution.

12  
13 The limited amount of diversity (average 4 SNPs) seen within this clade is consistent  
14  
15 with a single founding genotype coinciding with the opening of the burns unit, based  
16  
17 on estimates from a previous study using WGS which reported that mutations  
18  
19 accumulate at a rate of approximately one every 3-4 months in a hospital-associated  
20  
21 clone.[49] However our results suggest that our isolates accumulate mutations even  
22  
23 more slowly. This may be due to reduced growth rates in nutritionally-poor  
24  
25 biofilms.[50]  
26  
27  
28

29  
30 It is notable that antibiotic resistance to multiple first-line agents developed rapidly in  
31  
32 response to therapy. These results underline the importance of selecting appropriate  
33  
34 antibiotic therapy in *P. aeruginosa* infections. It is reassuring however that antibiotic  
35  
36 resistance genotypes selected *in vivo* did not show evidence of persistence in the  
37  
38 ward environment or transmission to other patients.  
39  
40  
41

42  
43 Our study has certain limitations. Based on a previous audit, we expected around  
44  
45 one-third of patients screened for *P. aeruginosa* would develop colonisation or  
46  
47 clinical infection. In fact, only 5 out of 30 of patients were colonised. This may have  
48  
49 been related to guidance and engineering interventions being put in place during the  
50  
51 study as detailed in national guidance issued whilst this study was on-going. In  
52  
53 addition, infection control policies were revised to address control of an outbreak of a  
54  
55 multi-drug resistant *A. baumannii* in this same burns unit. Following these  
56  
57  
58  
59  
60

1  
2  
3 interventions, only 1 of the last 20 patients recruited was infected with *P. aeruginosa*  
4  
5 which may demonstrate the importance of national guidance in reducing  
6  
7 transmissions.  
8  
9

10  
11 By focusing on burns patients who receive hydrotherapy, our study population were  
12  
13 at extremely high risk of waterborne infection. In other patient groups it may be that  
14  
15 alternative routes of transmission including cross-infection or endogenous carriage  
16  
17 play a more important role. Our results suggest that our burns unit is endemically  
18  
19 colonised with a distinct clone of *P. aeruginosa* that may have been imported  
20  
21 coinciding with the opening of the hospital. Other intensive care units, particularly  
22  
23 those which have been open for longer may have harbour a greater diversity of *P.*  
24  
25 *aeruginosa* as a result of increased opportunities for clones to be imported.  
26  
27

28  
29 One potential application for WGS in infection control would be to determine whether  
30  
31 cases are as a result of water transmission, or represent sporadic clones originating  
32  
33 from the wider environment. Despite improved guidance concerning improved  
34  
35 engineering infection control practices and the introduction of the water safety group  
36  
37 in the UK, it may not be realistic to eliminate *P. aeruginosa* from hospitals entirely. In  
38  
39 augmented care units such as ITUs, burns units and neonatal wards where *P.*  
40  
41 *aeruginosa* poses a significant risk to vulnerable patients, the increased resolution  
42  
43 offered by WGS will justify its use, particularly as the costs continue to fall.  
44  
45  
46  
47

48  
49 In conclusion, we have identified through WGS clear evidence for transmission of *P.*  
50  
51 *aeruginosa* from specific water outlets to burns patients and offer a forensic-level  
52  
53 framework for dealing with outbreaks linked to hospital water. We expect WGS will  
54  
55 continue to make inroads into clinical microbiology and become a vital tool for  
56  
57  
58  
59  
60

1  
2  
3  
4  
5  
6  
7  
8  
9  
10  
11  
12  
13  
14  
15  
16  
17  
18  
19  
20  
21  
22  
23  
24  
25  
26  
27  
28  
29  
30  
31  
32  
33  
34  
35  
36  
37  
38  
39  
40  
41  
42  
43  
44  
45  
46  
47  
48  
49  
50  
51  
52  
53  
54  
55  
56  
57  
58  
59  
60

tracking *P. aeruginosa* in the hospital environment, helping inform targeted control measures to help protect patients at risk of infection.

For peer review only



## Acknowledgments

We are grateful to Mark Webber for discussions on antibiotic resistance and to Paul Keim for discussion on phylogenetic placement of metagenomics samples. We thank Chris Thomas for useful discussions about *P. aeruginosa* plasmids. We thank Lex Nederbragt, Ave Tooming-Klunderud and the staff of the Norwegian Sequencing Centre, Oslo for Pacific Biosciences sequencing. We thank Matthew Smith-Banks for laboratory assistance with processing samples. We thank Jimmy Walker for critical reading of the manuscript.

## Contributors

MP NM BO conceived the study. CW and AB enrolled patients into study and collected samples. NC collected environmental and water samples. NC CC MN processed samples and performed microbiology. NC CC JQ did sequencing. JQ NC NL analysed the data. NL NC JQ MP BO wrote the paper. All authors commented on the manuscript draft.

## Funding

This paper presents independent research funded by the National Institute for Health research (NIHR). The views expressed are those of the author(s) and not necessarily those of the NHS, the NIHR or the Department of Health.

## Competing interests

None

## Data Sharing Statement

Pacific Biosciences raw data files are available from the corresponding author (Nicholas J Loman, n.j.loman@bham.ac.uk) and will be made available via Data Dryad.

### Ethics approval

The study protocol received approval from National Research Ethics Service committee in the West Midlands (reference number 12/WM/0181).

### REFERENCES

- 1 Reuter S, Sigge A, Wiedeck H, *et al.* Analysis of transmission pathways of *Pseudomonas aeruginosa* between patients and tap water outlets. *Crit Care Med* 2002;**30**:2222–8. doi:10.1097/01.CCM.0000025907.12833.10
- 2 Struelens MJ, Rost F, Deplano A, *et al.* *Pseudomonas aeruginosa* and Enterobacteriaceae bacteremia after biliary endoscopy: an outbreak investigation using DNA macrorestriction analysis. *Am J Med* 1993;**95**:489–98.
- 3 DiazGranados CA, Jones MY, Kongphet-Tran T, *et al.* Outbreak of *Pseudomonas aeruginosa* infection associated with contamination of a flexible bronchoscope. *Infect Control Hosp Epidemiol* 2009;**30**:550–5. doi:10.1086/597235
- 4 Crivaro V, Di Popolo A, Caprio A, *et al.* *Pseudomonas aeruginosa* in a neonatal intensive care unit: molecular epidemiology and infection control measures. *BMC Infect Dis* 2009;**9**:70. doi:10.1186/1471-2334-9-70
- 5 Moolenaar RL, Crutcher JM, San Joaquin VH, *et al.* A prolonged outbreak of *Pseudomonas aeruginosa* in a neonatal intensive care unit: did staff fingernails play a role in disease transmission? *Infect Control Hosp Epidemiol* 2000;**21**:80–5. doi:10.1086/501739
- 6 Trautmann M, Lepper PM, Haller M. Ecology of *Pseudomonas aeruginosa* in the intensive care unit and the evolving role of water outlets as a reservoir of the organism. *Am J Infect Control* 2005;**33**:S41–9. doi:10.1016/j.ajic.2005.03.006
- 7 Foca M, Jakob K, Whittier S, *et al.* Endemic *Pseudomonas aeruginosa* infection in a neonatal intensive care unit. *N Engl J Med* 2000;**343**:695–700. doi:10.1056/NEJM200009073431004
- 8 Kolmos HJ, Thuesen B, Nielsen SV, *et al.* Outbreak of infection in a

- 1  
2  
3 burns unit due to *Pseudomonas aeruginosa* originating from  
4 contaminated tubing used for irrigation of patients. *J Hosp Infect*  
5 1993;**24**:11–21.  
6
- 7  
8 9 Widmer AF, Wenzel RP, Trilla A, *et al.* Outbreak of *Pseudomonas*  
9 *aeruginosa* infections in a surgical intensive care unit: probable  
10 transmission via hands of a health care worker. *Clin Infect Dis*  
11 1993;**16**:372–6.  
12
- 13 10 Srinivasan A, Wolfenden LL, Song X, *et al.* An outbreak of *Pseudomonas*  
14 *aeruginosa* infections associated with flexible bronchoscopes. *N Engl J*  
15 *Med* 2003;**348**:221–7. doi:10.1056/NEJMoa021808  
16
- 17 11 Wise J. Three babies die in pseudomonas outbreak at Belfast neonatal  
18 unit. *BMJ*. 2012;**344**:e592.  
19
- 20 12 Breathnach AS, Cubbon MD, Karunaharan RN, *et al.* Multidrug-resistant  
21 *Pseudomonas aeruginosa* outbreaks in two hospitals: association with  
22 contaminated hospital waste-water systems. *J Hosp Infect* 2012;**82**:19–  
23 24. doi:10.1016/j.jhin.2012.06.007  
24
- 25 13 Walker JT, Jhutti A, Parks S, *et al.* Investigation of healthcare-acquired  
26 infections associated with *Pseudomonas aeruginosa* biofilms in taps in  
27 neonatal units in Northern Ireland. *J Hosp Infect* 2014;**86**:16–23.  
28 doi:10.1016/j.jhin.2013.10.003  
29
- 30 14 *Health Technical Memorandum*  
31  
32 04-01: Addendum. Department of Health  
33 [https://www.gov.uk/government/uploads/system/uploads/attachment\\_data/file/140105/Health\\_Technical\\_Memorandum\\_04-01\\_Addendum.pdf](https://www.gov.uk/government/uploads/system/uploads/attachment_data/file/140105/Health_Technical_Memorandum_04-01_Addendum.pdf)  
34 (accessed 11 Dec2013).  
35  
36  
37
- 38 15 Jefferies JMC, Cooper T, Yam T, *et al.* *Pseudomonas aeruginosa*  
39 outbreaks in the neonatal intensive care unit—a systematic review of risk  
40 factors and environmental sources. *J Med Microbiol* 2012;**61**:1052–61.  
41 doi:10.1099/jmm.0.044818-0  
42
- 43 16 Cholley P, Thouverez M, Hocquet D, *et al.* Most multidrug-resistant  
44 *Pseudomonas aeruginosa* isolates from hospitals in eastern France  
45 belong to a few clonal types. *J Clin Microbiol* 2011;**49**:2578–83.  
46 doi:10.1128/JCM.00102-11  
47
- 48 17 Curran B, Jonas D, Grundmann H, *et al.* Development of a multilocus  
49 sequence typing scheme for the opportunistic pathogen *Pseudomonas*  
50 *aeruginosa*. *J Clin Microbiol* 2004;**42**:5644–9.  
51 doi:10.1128/JCM.42.12.5644-5649.2004  
52
- 53 18 Harris SR, Cartwright EJP, Török ME, *et al.* Whole-genome sequencing  
54 for analysis of an outbreak of methicillin-resistant *Staphylococcus aureus*:  
55 a descriptive study. *Lancet Infect Dis* 2013;**13**:130–6. doi:10.1016/S1473-  
56  
57  
58  
59  
60

1  
2  
3 3099(12)70268-2  
4

- 5 19 Lewis T, Loman NJ, Bingle L, *et al.* High-throughput whole-genome  
6 sequencing to dissect the epidemiology of *Acinetobacter baumannii*  
7 isolates from a hospital outbreak. *J Hosp Infect* 2010;**75**:37–41.  
8 doi:10.1016/j.jhin.2010.01.012  
9
- 10 20 Snitkin ES, Zelazny AM, Thomas PJ, *et al.* Tracking a hospital outbreak  
11 of carbapenem-resistant *Klebsiella pneumoniae* with whole-genome  
12 sequencing. *Sci Transl Med* 2012;**4**:148ra116.  
13 doi:10.1126/scitranslmed.3004129  
14
- 15 21 Loman NJ, Misra RV, Dallman TJ, *et al.* Performance comparison of  
16 benchtop high-throughput sequencing platforms. *Nat Biotechnol*  
17 2012;**30**:434–9. doi:10.1038/nbt.2198  
18
- 19 22 Tredget EE, Shankowsky HA, Joffe AM, *et al.* Epidemiology of infections  
20 with *Pseudomonas aeruginosa* in burn patients: the role of hydrotherapy.  
21 *Clin Infect Dis* 1992;**15**:941–9.  
22
- 23 23 Langschmidt J, Caine PL, Wearn CM, *et al.* Hydrotherapy in burn care: A  
24 survey of hydrotherapy practices in the UK and Ireland and literature  
25 review. *Burns* Published Online First: 10 December 2013.  
26 doi:10.1016/j.burns.2013.11.006  
27
- 28 24 Tredget EE, Shankowsky HA, Rennie R, *et al.* *Pseudomonas* infections in  
29 the thermally injured patient. *Burns* 2004;**30**:3–26.  
30
- 31 25 Davison PG, Loiselle FB, Nickerson D. Survey on current hydrotherapy  
32 use among North American burn centers. *J Burn Care Res* 2010;**31**:393–  
33 9. doi:10.1097/BCR.0b013e3181db5215  
34
- 35 26 Bolger AM, Lohse M, Usadel B. Trimmomatic: a flexible trimmer for  
36 Illumina sequence data. *Bioinformatics* Published Online First: 28 April  
37 2014. doi:10.1093/bioinformatics/btu170  
38
- 39 27 Stewart L, Ford A, Sangal V, *et al.* Draft genomes of 12 host-adapted and  
40 environmental isolates of *Pseudomonas aeruginosa* and their positions in  
41 the core genome phylogeny. *Pathog Dis* Published Online First: 26  
42 October 2013. doi:10.1111/2049-632X.12107  
43
- 44 28 Li H, Durbin R. Fast and accurate long-read alignment with Burrows-  
45 Wheeler transform. *Bioinformatics* 2010;**26**:589–95.  
46 doi:10.1093/bioinformatics/btp698  
47
- 48 29 Koboldt DC, Zhang Q, Larson DE, *et al.* VarScan 2: somatic mutation and  
49 copy number alteration discovery in cancer by exome sequencing.  
50 *Genome Res* 2012;**22**:568–76. doi:10.1101/gr.129684.111  
51
- 52 30 Price MN, Dehal PS, Arkin AP. FastTree 2--approximately maximum-  
53 likelihood trees for large alignments. *PLoS One* 2010;**5**:e9490.  
54 doi:10.1371/journal.pone.0009490  
55  
56  
57  
58  
59  
60

- 1  
2  
3 31 Zerbino DR, Birney E. Velvet: algorithms for de novo short read assembly  
4 using de Bruijn graphs. *Genome Res* 2008;**18**:821–9.  
5 doi:10.1101/gr.074492.107  
6
- 7 32 Wood DE, Salzberg SL. Kraken: ultrafast metagenomic sequence  
8 classification using exact alignments. *Genome Biol* 2014;**15**:R46.  
9 doi:10.1186/gb-2014-15-3-r46  
10
- 11 33 Matsen FA, Kodner RB, Armbrust EV. pplacer: linear time maximum-  
12 likelihood and Bayesian phylogenetic placement of sequences onto a  
13 fixed reference tree. *BMC Bioinformatics* 2010;**11**:538. doi:10.1186/1471-  
14 2105-11-538  
15
- 16 34 Scott FW, Pitt TL. Identification and characterization of transmissible  
17 *Pseudomonas aeruginosa* strains in cystic fibrosis patients in England  
18 and Wales. *J Med Microbiol* 2004;**53**:609–15.  
19
- 20 35 Panagea S, Winstanley C, Parsons YN, *et al.* PCR-based detection of a  
21 cystic fibrosis epidemic strain of *Pseudomonas Aeruginosa*. *Mol Diagn*  
22 2003;**7**:195–200.  
23
- 24 36 Gardy JL, Johnston JC, Ho Sui SJ, *et al.* Whole-genome sequencing and  
25 social-network analysis of a tuberculosis outbreak. *N Engl J Med*  
26 2011;**364**:730–9. doi:10.1056/NEJMoa1003176  
27
- 28 37 Bryant JM, Grogono DM, Greaves D, *et al.* Whole-genome sequencing to  
29 identify transmission of *Mycobacterium abscessus* between patients with  
30 cystic fibrosis: a retrospective cohort study. *Lancet* 2013;**381**:1551–60.  
31 doi:10.1016/S0140-6736(13)60632-7  
32
- 33 38 Lienau EK, Strain E, Wang C, *et al.* Identification of a salmonellosis  
34 outbreak by means of molecular sequencing. *N Engl J Med*  
35 2011;**364**:981–2. doi:10.1056/NEJMc1100443  
36
- 37 39 Lambert PA. Mechanisms of antibiotic resistance in *Pseudomonas*  
38 *aeruginosa*. *J R Soc Med* 2002;**95 Suppl 41**:22–6.  
39
- 40 40 Sobel ML, Neshat S, Poole K. Mutations in PA2491 (*mexS*) promote  
41 MexT-dependent *mexEF-oprN* expression and multidrug resistance in a  
42 clinical strain of *Pseudomonas aeruginosa*. *J Bacteriol* 2005;**187**:1246–  
43 53. doi:10.1128/JB.187.4.1246-1253.2005  
44
- 45 41 Quinn JP, Dudek EJ, DiVincenzo CA, *et al.* Emergence of resistance to  
46 imipenem during therapy for *Pseudomonas aeruginosa* infections. *J*  
47 *Infect Dis* 1986;**154**:289–94.  
48
- 49 42 Cao L, Srikumar R, Poole K. MexAB-OprM hyperexpression in NalC-type  
50 multidrug-resistant *Pseudomonas aeruginosa*: identification and  
51 characterization of the *nalC* gene encoding a repressor of PA3720-  
52 PA3719. *Mol Microbiol* 2004;**53**:1423–36. doi:10.1111/j.1365-  
53 2958.2004.04210.x  
54  
55  
56  
57  
58  
59  
60

- 1  
2  
3 43 Llanes C, Hocquet D, Vogne C, *et al.* Clinical strains of *Pseudomonas*  
4 *aeruginosa* overproducing MexAB-OprM and MexXY efflux pumps  
5 simultaneously. *Antimicrob Agents Chemother* 2004;**48**:1797–802.  
6  
7 44 Cambau E, Perani E, Dib C, *et al.* Role of mutations in DNA gyrase  
8 genes in ciprofloxacin resistance of *Pseudomonas aeruginosa*  
9 susceptible or resistant to imipenem. *Antimicrob Agents Chemother*  
10 1995;**39**:2248–52.  
11  
12 45 Kelsey M. *Pseudomonas* in augmented care: should we worry? *J*  
13 *Antimicrob Chemother* 2013;**68**:2697–700. doi:10.1093/jac/dkt288  
14  
15 46 Rogers DE. The changing pattern of life-threatening microbial disease. *N*  
16 *Engl J Med* 1959;**261**:677–83. doi:10.1056/NEJM195910012611401  
17  
18 47 Martin K, Baddal B, Mustafa N, *et al.* Clusters of genetically similar  
19 isolates of *Pseudomonas aeruginosa* from multiple hospitals in the UK. *J*  
20 *Med Microbiol* 2013;**62**:988–1000. doi:10.1099/jmm.0.054841-0  
21  
22 48 Slekovec C, Plantin J, Cholley P, *et al.* Tracking down antibiotic-resistant  
23 *Pseudomonas aeruginosa* isolates in a wastewater network. *PLoS One*  
24 2012;**7**:e49300. doi:10.1371/journal.pone.0049300  
25  
26 49 Snyder LA, Loman N, Faraj LA, *et al.* Epidemiological investigation of  
27 *Pseudomonas aeruginosa* isolates from a six-year-long hospital outbreak  
28 using high-throughput whole genome sequencing. *Euro Surveill* 2013;**18**.  
29  
30 50 Donlan RM. Biofilm formation: a clinically relevant microbiological  
31 process. *Clin Infect Dis* 2001;**33**:1387–92. doi:10.1086/322972  
32  
33  
34  
35  
36  
37  
38  
39  
40

## Figure and Table Legends

### Figure 1 Legend

41  
42  
43  
44  
45  
46  
47  
48 An overview of all samples collected during the study in global phylogenetic context  
49  
50 with other sequenced strains of *P. aeruginosa*. Samples collected in this study are  
51  
52 widely dispersed in the tree, which contains isolates from different environments  
53  
54 (Panel A). Bar plots indicate the numbers of each type of sample collected (Panel C).  
55  
56  
57  
58  
59  
60



1  
2  
3 Microdiversity within each clade is shown, with the colour bar indicating the source of  
4 each sample (Panel C).  
5  
6  
7

### 8 9 **Figure 2 Legend**

10  
11 A schematic view of the 300-day study of *P. aeruginosa* in a burns centre and critical  
12 care unit. Time in days is shown along the X-axis with location along the Y-axis.  
13

14 Each circular icon indicates a positive isolate of *P. aeruginosa*. The icon's logotype  
15 indicates which environment it originated from (wound, urine/sputum, environment or  
16 water). The filled colour of the icon indicates the clade it belongs to. Patient icons  
17 represent the enrolment of a screening patient into the study and their location.  
18 Patient movements around the hospital are noted by dotted lines. The five patients  
19 infected with *P. aeruginosa* are denoted by rounded boxes. Boxes are coloured  
20 according to the patient number.  
21  
22  
23  
24  
25  
26  
27  
28  
29  
30  
31

### 32 33 **Figure 3 Legend**

34  
35 The high-resolution phylogenetic reconstruction of clade E isolates. This  
36 demonstrates the clustering of genotypes by bed space. Patient associated samples  
37 are contained within the room 11 clade. This clade contains water samples from the  
38 shower and environmental samples from the shower, drain and trolley. The water  
39 samples from the room 11 tap are in a distinct clade, indicating the biofilm within the  
40 tap has a distinct genotype to the shower. This also indicated environmental  
41 contamination was more likely to arise from contaminated shower water than tap  
42 water. Details of sampling site, days since start of study and presence of pBURNS  
43 plasmids are also shown. The likely phylogenetic position of *P. aeruginosa* detected  
44  
45  
46  
47  
48  
49  
50  
51  
52  
53  
54  
55  
56  
57  
58  
59  
60

1  
2  
3 in a biofilm from a thermostatic mixer valve is shown in the clade associated with  
4  
5 room 9 and indicated 'TMV'.  
6  
7

### 8 **Appendix 1**

9  
10  
11 Phylogenetic tree, sample origin and antibiotic-resistance phenotype for clade C  
12  
13 isolates.  
14

### 15 **Appendix 2**

16  
17  
18 Phylogenetic tree, sample origin and antibiotic-resistance phenotype for clade D  
19  
20 isolates.  
21  
22

### 23 **Appendix 3**

24  
25  
26 Phylogenetic tree, sample origin and antibiotic-resistance phenotype for clade E  
27  
28 isolates.  
29  
30

### 31 **Appendix 4**

32  
33  
34 Phylogenetic tree, sample origin and antibiotic-resistance phenotype for clade G  
35  
36 isolates.  
37  
38

### 39 **Appendix 5**

40  
41  
42 A physical map of the burns unit, indicating individual patient bed areas, shower  
43  
44 areas. The water supply is indicated by a blue line.  
45

### 46 **Appendix 6**

47  
48  
49 Clade E isolates in phylogenetic context with the metagenomics sample from a tap  
50  
51 mixer valve.  
52  
53

### 54 **Appendix 7**

55  
56  
57 Single nucleotide and small indel variants detected within clade C isolates.  
58  
59  
60



**Appendix 8**

Single nucleotide and small indel variants detected within clade D isolates.

**Appendix 9**

Single nucleotide and small indel variants detected within clade E isolates.

**Appendix 10**

Single nucleotide and small indel variants detected within clade G isolates.

**Appendix 11**

The type of antibiotics administered to the five patients in this study.

**Appendix 12**

Mutations predicted to be associated with antibiotic-resistance.

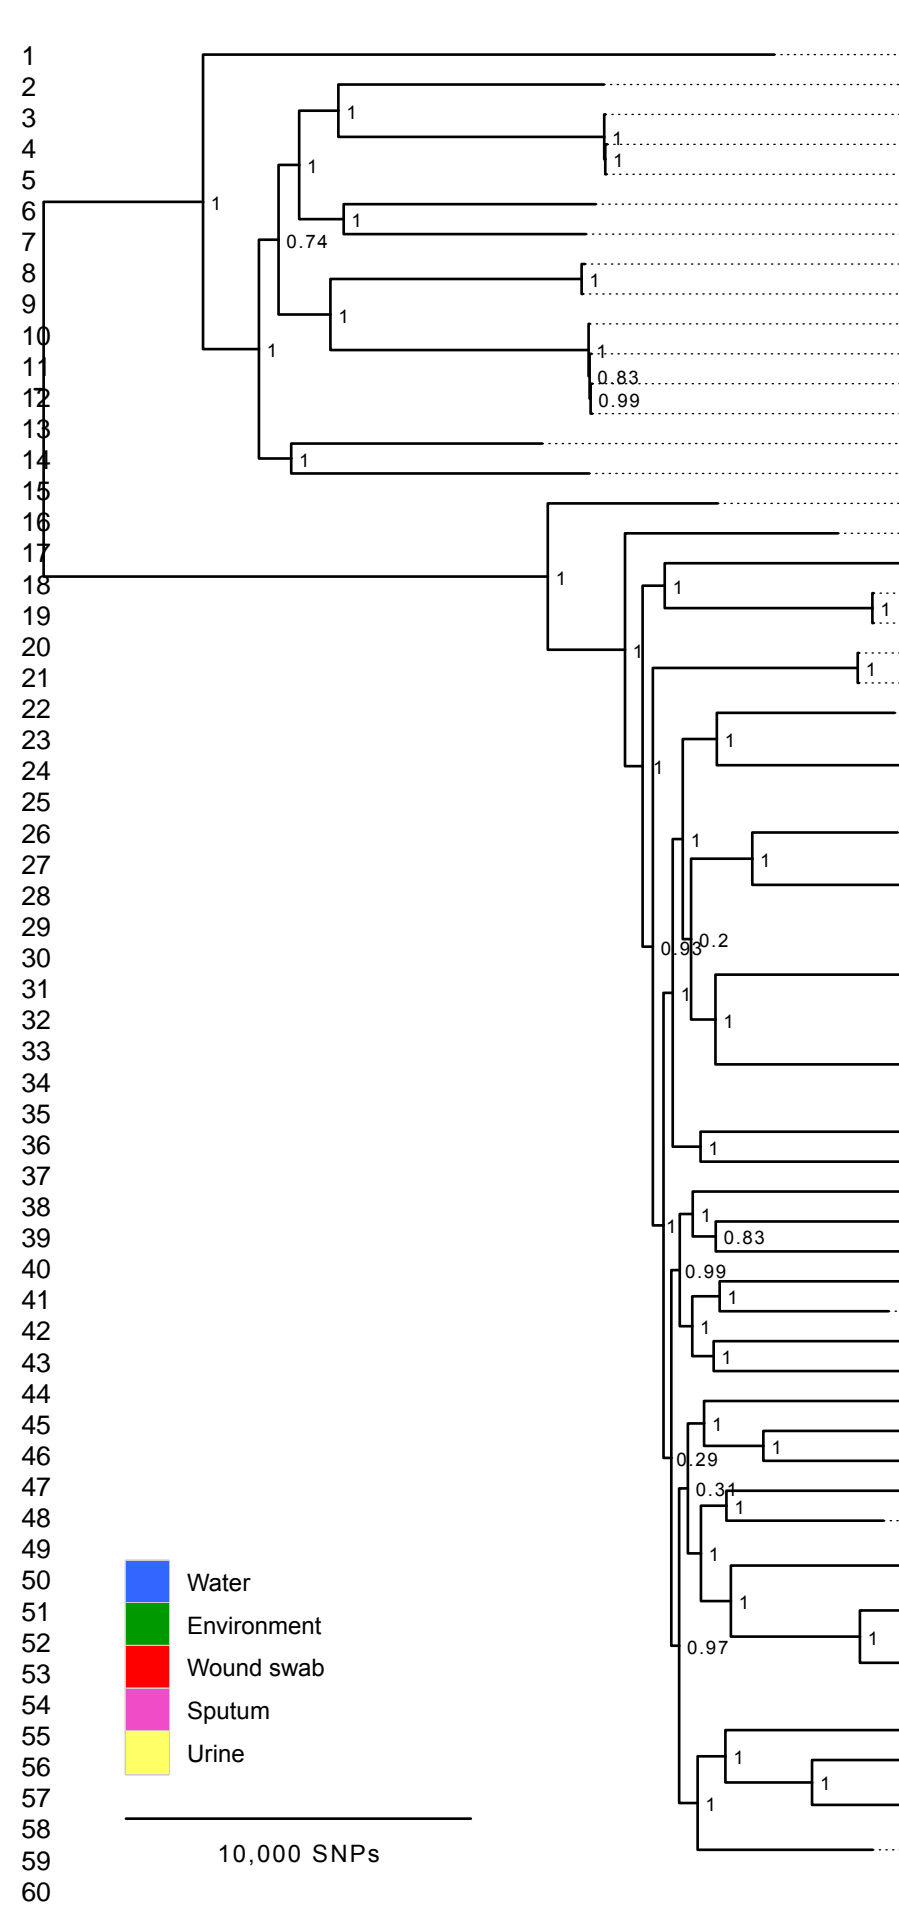

| Strain      | MLST  | Origin/comment                        |
|-------------|-------|---------------------------------------|
| Clade A     | 667   | This study                            |
| PABL056     | 298   | Blood, USA                            |
| E2UOS       | 235   | Soil                                  |
| NCGM2.S1    | 235   | Urinary tract infection               |
| 39016       | 235   | Keratitis                             |
| Clade B     | Novel | This study                            |
| Clade C     | 319   | This study                            |
| 152504      | 560   | Sputum, non-CF                        |
| PAb1        | 560   | Frostbite                             |
| CI27        | Novel | Sputum, CF                            |
| PA14        | Novel | Plant, USA                            |
| J1532       |       | CF, mucoid                            |
| J1385       |       | CF, progenitor of J1532               |
| ATCC 700888 |       | Industrial water system               |
| B136.33     | 1024  | Diarrhoea                             |
| 18A         | 788   | CF                                    |
| PAK         | 693   | PAK                                   |
| 2192        |       | CF                                    |
| PA17        | 810   | CF, progenitor of PA17SCV             |
| PA17SCV     | 810   | Lab evolved from CF Isolate           |
| C1426       |       | CF, progenitor of C1433               |
| C1433       | 132   | CF, mucoid                            |
| NCMG1179    | 1285  | Respiratory, Japan                    |
| ATCC 25324  | Novel | Glass-crusher air plate               |
| Clade D     | 348   | This study                            |
| CIG1        | 348   | Sputum, CF                            |
| DQ8         | 267   | Crude oil, China                      |
| MRW44.1     | Novel | Mutator lineage 44                    |
| PA01        | Novel | Burn                                  |
| PA0579      | Novel | Mucoid                                |
| MSH3        |       | Environmental, Mount St. Helens       |
| MSH-10      | 689   | Environmental                         |
| MSH10 UoS   | 689   | Environmental, Mount St. Helens       |
| PA213BR     | 277   | Polymixin resistant, Brazil           |
| PA9BR       | 277   | Brazil, non-CF                        |
| PA19BR      | 277   | Polymixin resistant, Brazil           |
| ATCC 14886  | 260   | Soil                                  |
| N002        |       | Crude oil, India                      |
| AES-1R      |       | Australia, CF                         |
| E2UoW       | 41    | Plant, USA                            |
| VRFPA02     | 111   | Eye, India                            |
| Clade E     | 395   | This study                            |
| LESB58      | 146   | Liverpool epidemic strain             |
| PA62        |       | Soil                                  |
| C1334       | 439   | CF, mucoid, from same patient as C763 |
| Clade F     | Novel | This study                            |
| Clade G     | 17    | This study                            |
| PACS2       | 1394  | CF                                    |
| PA45        | 266   | Blood, Italy                          |
| XMG         | Novel | Soil, China                           |
| 138244      | 175   | Sputum, non-CF                        |
| PA21_ST175  | 175   | Blood, MDR                            |
| C763        | 179   | CF, from same patient as C1334        |
| Clade H     | 155   | This study                            |
| AH16        | 155   | China, sputum, non-CF                 |
| LCT-PA102   | 155   | Blood                                 |
| SJTD-1      | Novel | Crude oil, China                      |
| C3719       |       | Manchester epidemic strain            |
| DK2         | 386   | CF, Denmark                           |
| DK2_CF510   | 386   | CF, Denmark                           |
| M18         | 1239  | Plant isolate, China                  |

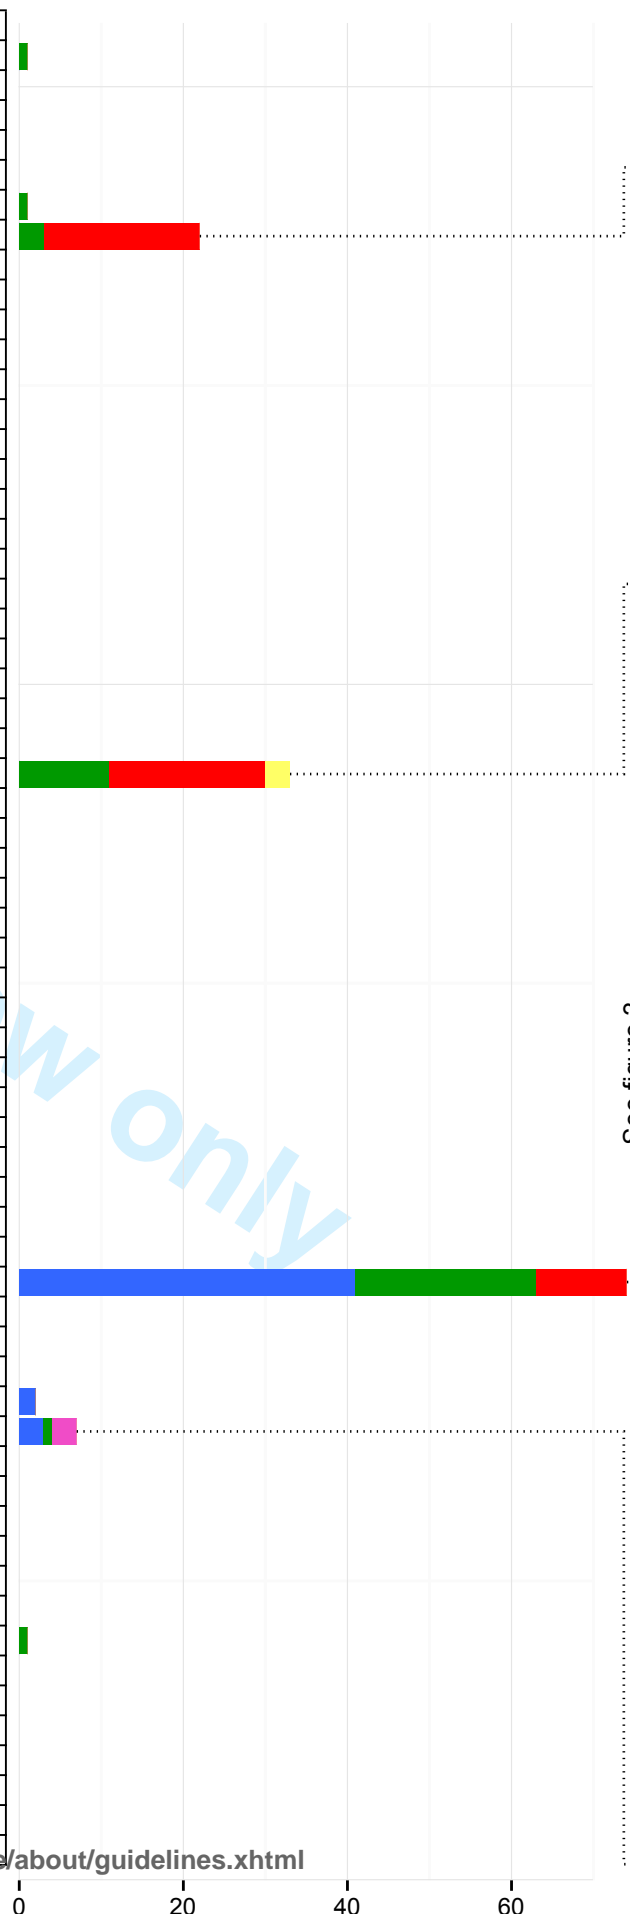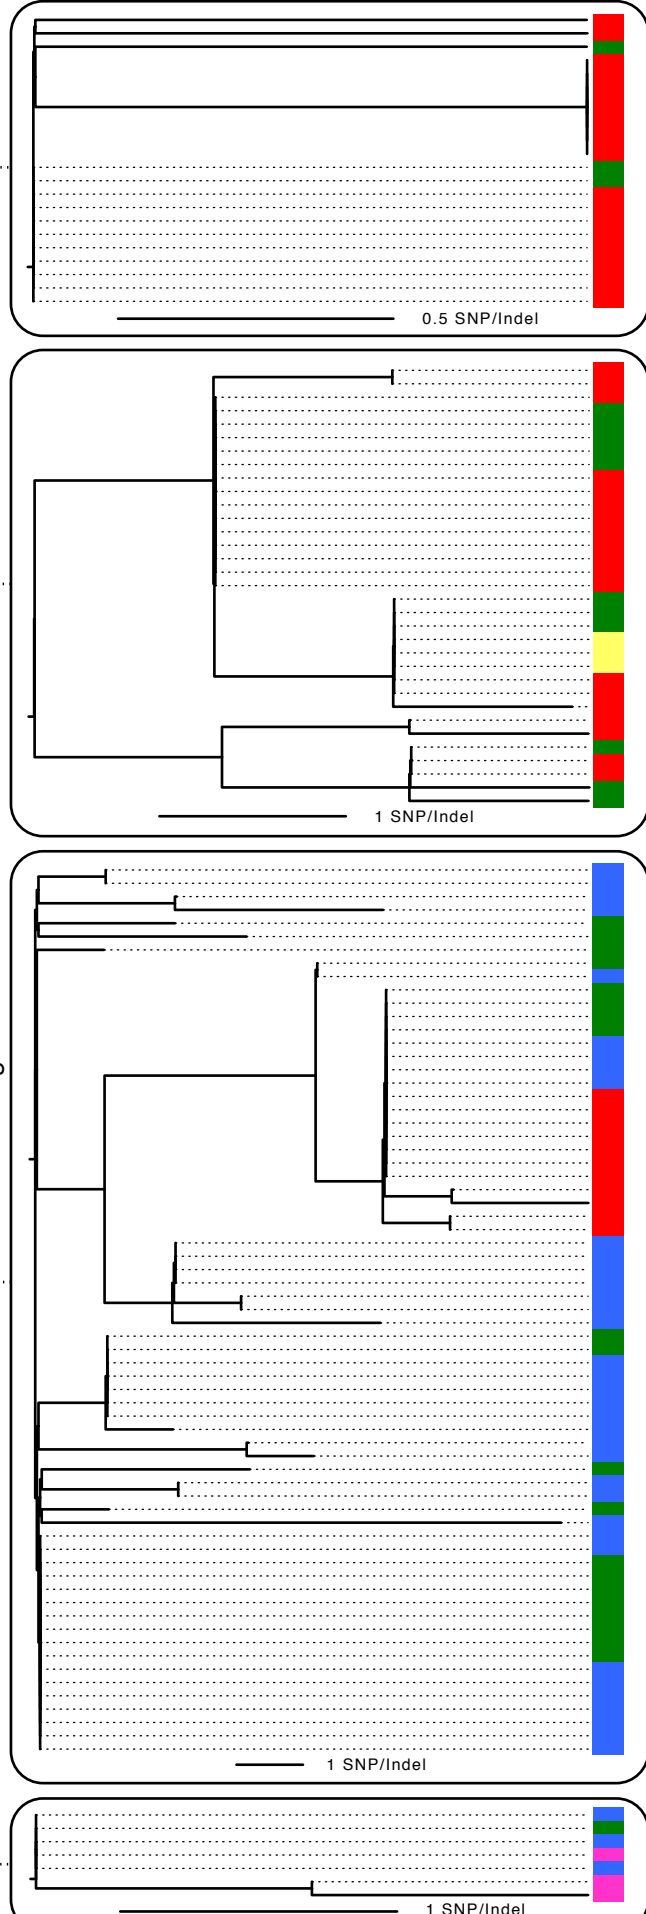

See figure 3

1 7 14 23 33 37 40 48 50 55 56 57 60 63 65 85 89 90 91 107 117 142 154 172 174 176 188 190 204 221 229 231 242 243 244 245 249 251

1  
3  
5  
6  
7  
8  
9  
10  
11  
12  
13  
14  
15  
16  
17  
18  
19  
20  
21  
22  
23  
24  
25  
26  
27

Legend:

- Yellow circle: Clade C
- Green circle: Clade D
- Blue circle: Clade E
- Red circle: Clade G
- White circle: Other clade
- Water drop icon: Water
- Burn icon: Burn
- Leaf icon: Environmental
- Urine/sputum icon: Urine/sputum
- Person icon: Screening patient
- White box icon: Positive patient
- Dashed arrow icon: Bed movement

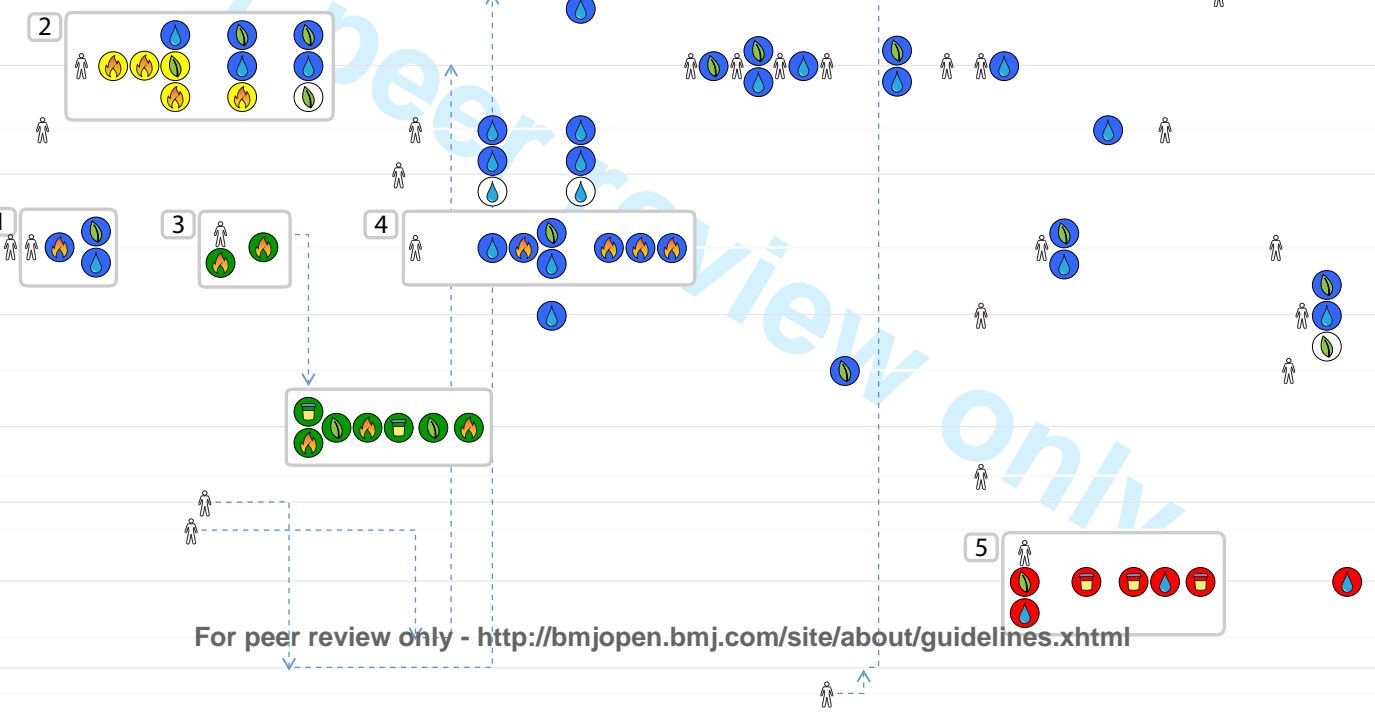

For peer review only - <http://bmjopen.bmj.com/site/about/guidelines.xhtml>

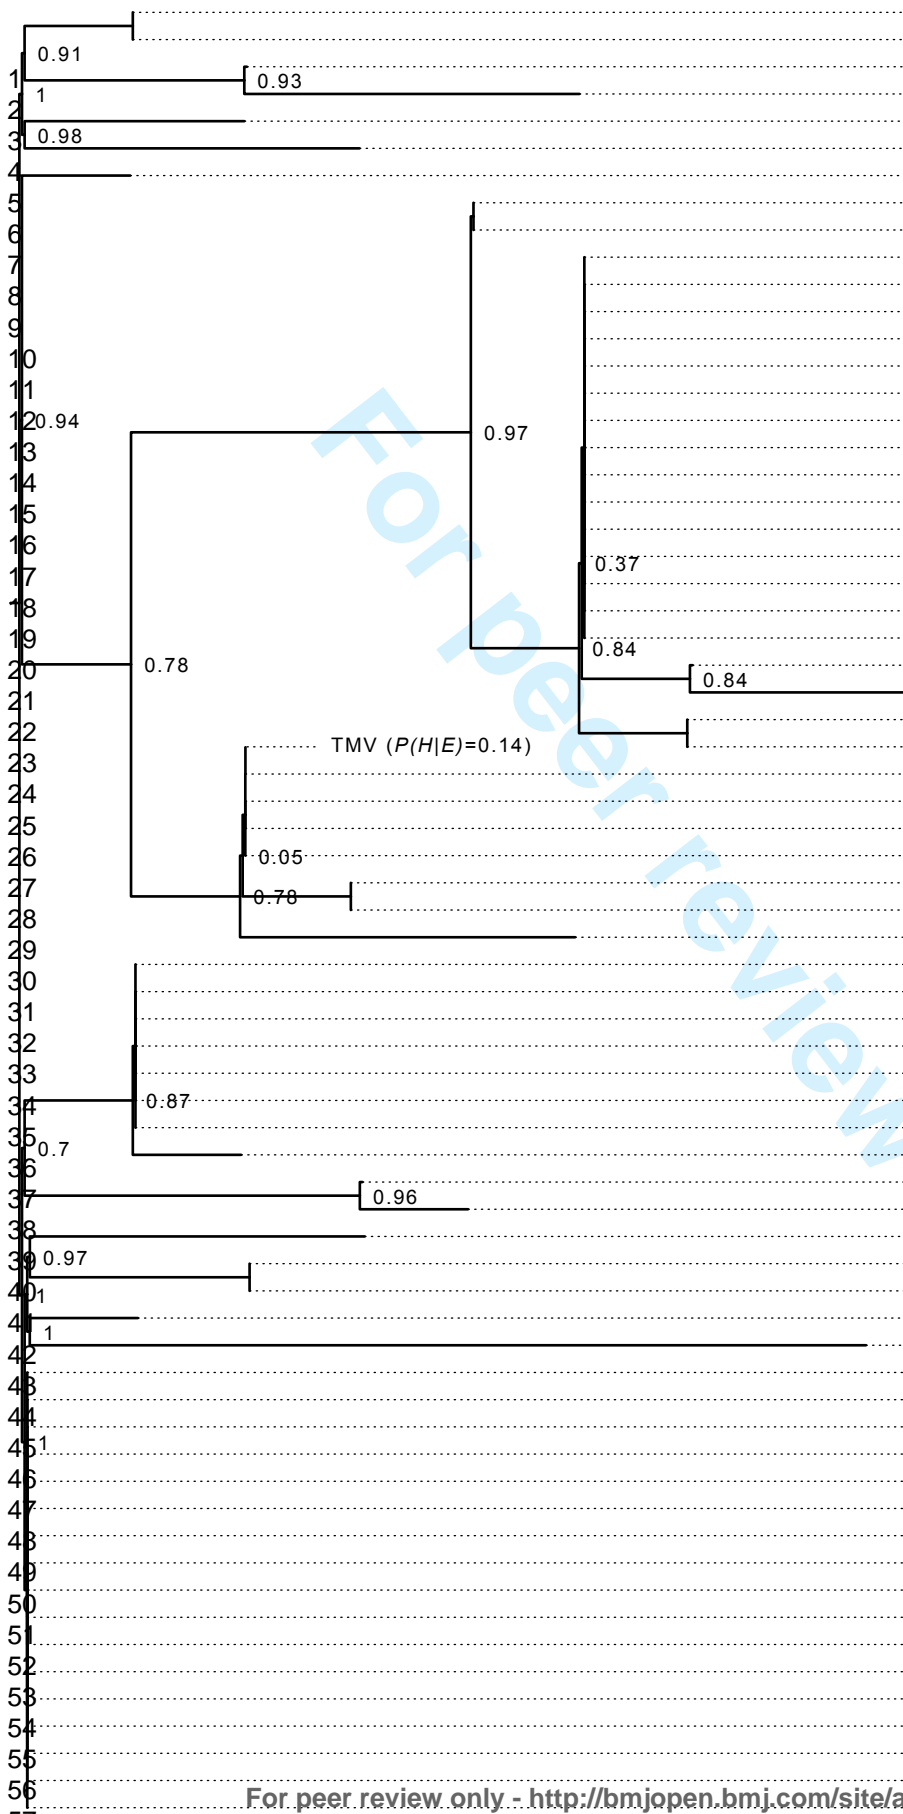

| Bed | Type of Specimen     | Days | pB1 | pB2 |
|-----|----------------------|------|-----|-----|
| 12  | Shower               | 292  |     |     |
|     | Shower               | 292  |     |     |
| 10  | Shower               | 90   |     |     |
|     | Shower               | 65   |     |     |
| 8   | Shower               | 49   |     |     |
| 12  | Shower               | 292  |     |     |
| 8   | Shower               | 176  |     |     |
|     | Drain                | 27   |     |     |
|     | Shower               | 27   |     |     |
|     | Drain                | 89   |     |     |
|     | Shower               | 89   |     |     |
|     | Shower               | 216  |     |     |
|     | Trolley              | 27   |     |     |
|     | Shower               | 89   |     |     |
|     | Shower               | 216  |     |     |
|     | Shower               | 89   |     |     |
|     | Shower               | 65   |     |     |
| 11  | Groin                | 14   |     |     |
|     | Anterior right thigh | 53   |     |     |
|     | Anterior right thigh | 103  |     |     |
|     | Anterior right shin  | 53   |     |     |
|     | Dorsum of left foot  | 85   |     |     |
|     | Dorsum of left foot  | 85   |     |     |
|     | Dorsum of left foot  | 85   |     |     |
|     | Anterior right thigh | 93   |     |     |
|     | Anterior right thigh | 103  |     |     |
|     | Anterior right thigh | 91   |     |     |
|     | Anterior right thigh | 91   |     |     |
|     | Shower               | 226  |     |     |
| 9   | Shower               | 90   |     |     |
|     | Shower               | 90   |     |     |
|     | Tap                  | 90   |     |     |
| 11  | Tap                  | 89   |     |     |
|     | Tap                  | 89   |     |     |
| 9   | Shower               | 65   |     |     |
|     | Shower               | 292  |     |     |
|     | Shower               | 278  |     |     |
|     | Shower               | 91   |     |     |
| 6   | Shower               | 292  |     |     |
|     | Shower               | 177  |     |     |
|     | Shower               | 91   |     |     |
|     | Shower               | 278  |     |     |
|     | Shower               | 190  |     |     |
|     | Shower               | 91   |     |     |
| 1   | Shower               | 91   |     |     |
| 8   | Sink                 | 113  |     |     |
| 12  | Shower               | 89   |     |     |
|     | Shower               | 89   |     |     |
| 6   | Shower               | 190  |     |     |
| 8   | Shower               | 155  |     |     |
| 5   | Tap                  | 91   |     |     |
| 7   | Shower               | 90   |     |     |
|     | Drain                | 146  |     |     |
|     | ECG leads            | 49   |     |     |
|     | Shower               | 49   |     |     |
|     | Shower               | 146  |     |     |
|     | Shower               | 55   |     |     |
|     | Shower               | 55   |     |     |
|     | Shower               | 40   |     |     |
| 8   | Shower               | 40   |     |     |
|     | Shower               | 49   |     |     |
|     | Shower               | 146  |     |     |
|     | Shower               | 176  |     |     |
|     | Shower               | 40   |     |     |
|     | Shower               | 49   |     |     |
|     | Shower               | 203  |     |     |
|     | Shower               | 55   |     |     |

For peer review only - <http://bmjopen.bmj.com/site/about/guidelines.xhtml>

| Sample Number | Patient | Ward | Bed | Type of Specimen | Site                     | Date     | TIM | PIP | TAZ | CAZ | AZT | IMI | MER | AMI | GEN | TOP | GIP | GOL |
|---------------|---------|------|-----|------------------|--------------------------|----------|-----|-----|-----|-----|-----|-----|-----|-----|-----|-----|-----|-----|
| 922           | P02     | BCU  | 8   | Wound swab       | Upper back               | 29/10/12 | R   | I   | I   | S   | I   | S   | S   | S   | S   | S   | S   | S   |
| 921           | P02     | BCU  | 8   | Wound swab       | Upper back               | 29/10/12 |     |     |     |     |     |     |     |     |     |     |     |     |
| 913           | P02     | BCU  | 8   | Environmental    | Shower trolley           | 29/10/12 | R   | S   | S   | S   | I   | S   | S   | S   | S   | S   | S   | S   |
| 919           | P02     | BCU  | 8   | Wound swab       | Chest                    | 29/10/12 | R   | I   | I   | S   | I   | I   | S   | S   | S   | S   | R   | S   |
| 926           | P02     | BCU  | 8   | Wound swab       | Right palm               | 02/11/12 | R   | I   | I   | S   | I   | I   | S   | S   | S   | S   | R   | S   |
| 909           | P02     | BCU  | 8   | Wound swab       | Anterior left upper-arm  | 26/10/12 | R   | I   | I   | S   | I   | R   | S   | S   | S   | S   | R   | S   |
| 908           | P02     | BCU  | 8   | Wound swab       | Anterior left upper-arm  | 26/10/12 | R   | I   | I   | S   | I   | S   | S   | S   | S   | S   | S   | S   |
| 925           | P02     | BCU  | 8   | Wound swab       | Anterior left upper-arm  | 02/11/12 | R   | I   | I   | S   | I   | I   | S   | S   | S   | S   | R   | S   |
| 932           | P02     | BCU  | 8   | Wound swab       | Back of head             | 07/11/12 | R   | I   | I   | S   | I   | R   | S   | S   | S   | S   | R   | S   |
| 928           | P02     | BCU  | 8   | Wound swab       | Upper back               | 02/11/12 | R   | I   | I   | S   | I   | I   | I   | S   | S   | S   | R   | S   |
| 927           | P02     | BCU  | 8   | Wound swab       | Upper back               | 02/11/12 | R   | I   | I   | S   | I   | I   | I   | S   | S   | S   | R   | S   |
| 915           | P02     | BCU  | 8   | Environmental    | Chair                    | 29/10/12 | R   | I   | I   | S   | I   | S   | S   | S   | S   | S   | S   | S   |
| 914           | P02     | BCU  | 8   | Environmental    | Chair                    | 29/10/12 | R   | S   | S   | S   | I   | S   | S   | S   | S   | S   | S   | S   |
| 904           | P02     | BCU  | 8   | Tissue           | Anterior right upper-arm | 22/10/12 | R   | S   | S   | S   | I   | S   | S   | S   | S   | S   | S   | S   |
| 905           | P02     | BCU  | 8   | Wound swab       | Chest                    | 26/10/12 | R   | I   | I   | S   | I   | I   | S   | S   | S   | S   | S   | S   |
| 906           | P02     | BCU  | 8   | Wound swab       | Chest                    | 26/10/12 | R   | I   | I   | S   | I   | I   | S   | S   | S   | S   | S   | S   |
| 920           | P02     | BCU  | 8   | Wound swab       | Chest                    | 29/10/12 | R   | I   | I   | S   | I   | R   | I   | S   | S   | S   | R   | S   |
| 918           | P02     | BCU  | 8   | Wound swab       | Chest                    | 29/10/12 | R   | I   | I   | S   | I   | S   | S   | S   | S   | S   | S   | S   |
| 907           | P02     | BCU  | 8   | Wound swab       | Abdomen                  | 26/10/12 | R   | I   | I   | S   | I   | S   | S   | S   | S   | S   | S   | S   |
| 911           | P02     | BCU  | 8   | Wound swab       | Anterior left forearm    | 26/10/12 | R   | I   | I   | S   | I   | I   | S   | S   | S   | S   | S   | S   |
| 912           | P02     | BCU  | 8   | Wound swab       | Anterior left forearm    | 26/10/12 | R   | I   | I   | S   | I   | I   | S   | S   | S   | S   | S   | S   |
| 923           | P02     | BCU  | 8   | Wound swab       | Posterior left upper-arm | 29/10/12 | R   | I   | I   | S   | I   | S   | S   | S   | S   | S   | S   | S   |

1 SNP/Indel

For peer review only. <http://bmjopen.bmj.com/site/about/guidelines.xhtml>

1  
2  
3  
4  
5  
6  
7  
8  
9  
10  
11  
12  
13  
14  
15  
16  
17  
18  
19  
20  
21  
22  
23  
24  
25  
26  
27  
28  
29

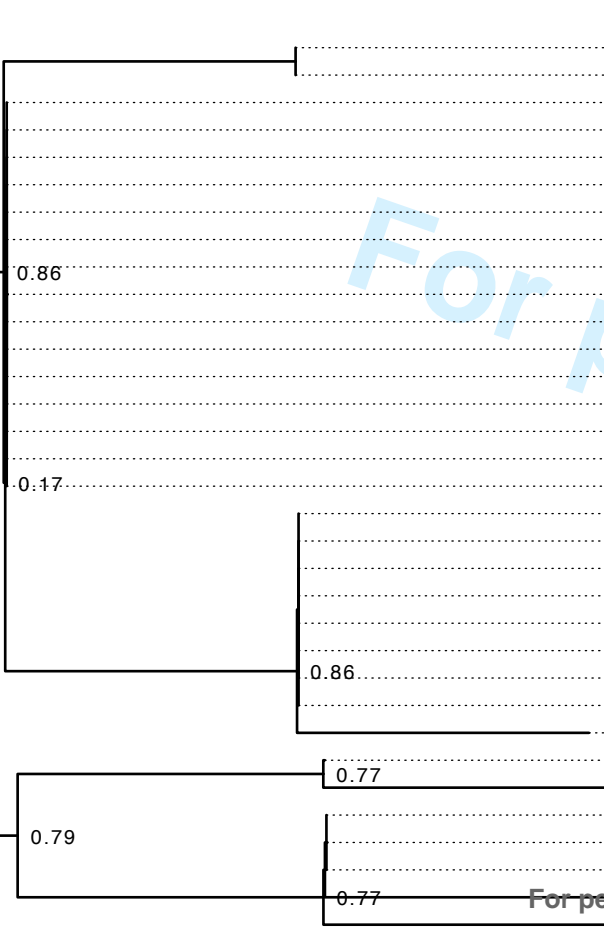

| Study Number | Patient | BMW | Open Bed | Type of Specimen | Site                  | Date     | TIM | PIP | TAZ | CAZ | AZT | IMI | MER | AMI | GEN | TOB | CIP | COL |
|--------------|---------|-----|----------|------------------|-----------------------|----------|-----|-----|-----|-----|-----|-----|-----|-----|-----|-----|-----|-----|
| 937          | P03     | BCU | 11       | Wound swab       | Anterior left thigh   | 08/11/12 |     |     |     |     |     |     |     |     |     |     |     |     |
| 936          | P03     | BCU | 11       | Wound swab       | Anterior left thigh   | 08/11/12 |     |     |     |     |     |     |     |     |     |     |     |     |
| 929          | P03     | BCU | 11       | Wound swab       | Posterior left thigh  | 06/11/12 | R   | S   | S   | S   | I   | R   | I   | S   | S   | S   | S   | S   |
| 951          | P03     | BCU | 15       | Environmental    | Bedside table         | 14/11/12 | R   | I   | I   | S   | I   | R   | I   | S   | S   | S   | S   | S   |
| 960          | P03     | BCU | 15       | Environmental    | Bedside table         | 20/11/12 | R   | S   | S   | S   | I   | R   | I   | S   | S   | S   | S   | S   |
| 961          | P03     | BCU | 15       | Environmental    | Door handle           | 20/11/12 | R   | I   | I   | S   | I   | R   | I   | S   | S   | S   | S   | S   |
| 958          | P03     | BCU | 15       | Environmental    | Shower chair          | 20/11/12 | R   | I   | I   | S   | I   | R   | I   | S   | S   | S   | S   | S   |
| 957          | P03     | BCU | 15       | Environmental    | Shower chair          | 20/11/12 | R   | S   | S   | S   | I   | R   | I   | S   | S   | S   | S   | S   |
| 940          | P03     | BCU | 15       | Wound swab       | Anterior right thigh  | 13/11/12 | S   | S   | S   | S   | I   | I   | I   | S   | S   | S   | S   | S   |
| 970          | P03     | BCU | 15       | Wound swab       | Anterior right thigh  | 22/11/12 | R   | I   | I   | S   | I   | R   | I   | S   | S   | S   | S   | S   |
| 944          | P03     | BCU | 15       | Wound swab       | Anterior right shin   | 13/11/12 | R   | I   | I   | S   | I   | R   | I   | S   | S   | S   | S   | S   |
| 945          | P03     | BCU | 15       | Wound swab       | Anterior right shin   | 13/11/12 | R   | S   | S   | S   | I   | R   | I   | S   | S   | S   | S   | S   |
| 946          | P03     | BCU | 15       | Wound swab       | Anterior left thigh   | 13/11/12 | R   | S   | S   | S   | I   | R   | I   | S   | S   | S   | S   | S   |
| 954          | P03     | BCU | 15       | Wound swab       | Anterior left thigh   | 15/11/12 | R   | I   | I   | S   | I   | R   | I   | S   | S   | S   | S   | S   |
| 947          | P03     | BCU | 15       | Wound swab       | Anterior left shin    | 13/11/12 | R   | S   | S   | S   | I   | R   | I   | S   | S   | S   | S   | S   |
| 972          | P03     | BCU | 15       | Wound swab       | Posterior left shin   | 22/11/12 | S   | S   | S   | S   | I   | R   | I   | S   | S   | S   | S   | S   |
| 949          | P03     | BCU | 15       | Wound swab       | Posterior right thigh | 13/11/12 | R   | I   | I   | S   | I   | R   | I   | S   | S   | S   | S   | S   |
| 950          | P03     | BCU | 15       | Environmental    | Bedside table         | 14/11/12 | R   | S   | S   | S   | I   | R   | I   | S   | S   | S   | S   | S   |
| 959          | P03     | BCU | 15       | Environmental    | Bedside table         | 20/11/12 | R   | I   | I   | S   | I   | R   | I   | S   | S   | S   | S   | S   |
| 953          | P03     | BCU | 15       | Environmental    | Toilet flush          | 14/11/12 | R   | S   | S   | S   | I   | I   | I   | S   | S   | S   | S   | S   |
| 938          | P03     | BCU | 15       | Urine            | Urine                 | 13/11/12 | R   | S   | S   | S   | I   | R   | I   | S   | S   | S   | S   | S   |
| 939          | P03     | BCU | 15       | Urine            | Urine                 | 13/11/12 | R   | S   | S   | S   | I   | R   | I   | S   | S   | S   | S   | S   |
| 956          | P03     | BCU | 15       | Urine            | Urine                 | 16/11/12 | R   | S   | S   | S   | I   | R   | I   | S   | S   | S   | S   | S   |
| 969          | P03     | BCU | 15       | Wound swab       | Anterior right thigh  | 22/11/12 | R   | S   | S   | S   | I   | R   | I   | S   | S   | S   | S   | S   |
| 971          | P03     | BCU | 15       | Wound swab       | Anterior left thigh   | 22/11/12 | R   | I   | I   | S   | I   | R   | I   | S   | S   | S   | S   | S   |
| 973          | P03     | BCU | 15       | Wound swab       | Posterior right thigh | 22/11/12 | R   | S   | S   | S   | I   | R   | I   | S   | S   | S   | S   | S   |
| 955          | P03     | BCU | 15       | Wound swab       | Anterior left thigh   | 15/11/12 | S   | S   | S   | S   | I   | R   | I   | S   | S   | S   | S   | S   |
| 975          | P03     | BCU | 15       | Wound swab       | Posterior right shin  | 22/11/12 | S   | S   | S   | S   | I   | R   | I   | S   | S   | S   | S   | S   |
| 962          | P03     | BCU | 15       | Environmental    | Shower chair          | 20/11/12 | S   | S   | S   | S   | I   | R   | I   | S   | S   | S   | S   | S   |
| 948          | P03     | BCU | 15       | Wound swab       | Posterior right thigh | 13/11/12 | S   | S   | S   | S   | I   | R   | I   | S   | S   | S   | S   | S   |
| 974          | P03     | BCU | 15       | Wound swab       | Posterior right thigh | 22/11/12 | S   | S   | S   | S   | I   | I   | I   | S   | S   | S   | S   | S   |
| 963          | P03     | BCU | 15       | Environmental    | Bedside table         | 20/11/12 | S   | S   | S   | S   | I   | I   | I   | S   | S   | S   | S   | S   |
| 964          | P03     | BCU | 15       | Environmental    | Bedside table         | 20/11/12 | S   | S   | S   | S   | I   | R   | I   | S   | S   | S   | S   | S   |

For peer review only (http://bmjopen.bmj.com/site/authn/submitting/authn\_guidance.html)

1 SNP/Indel

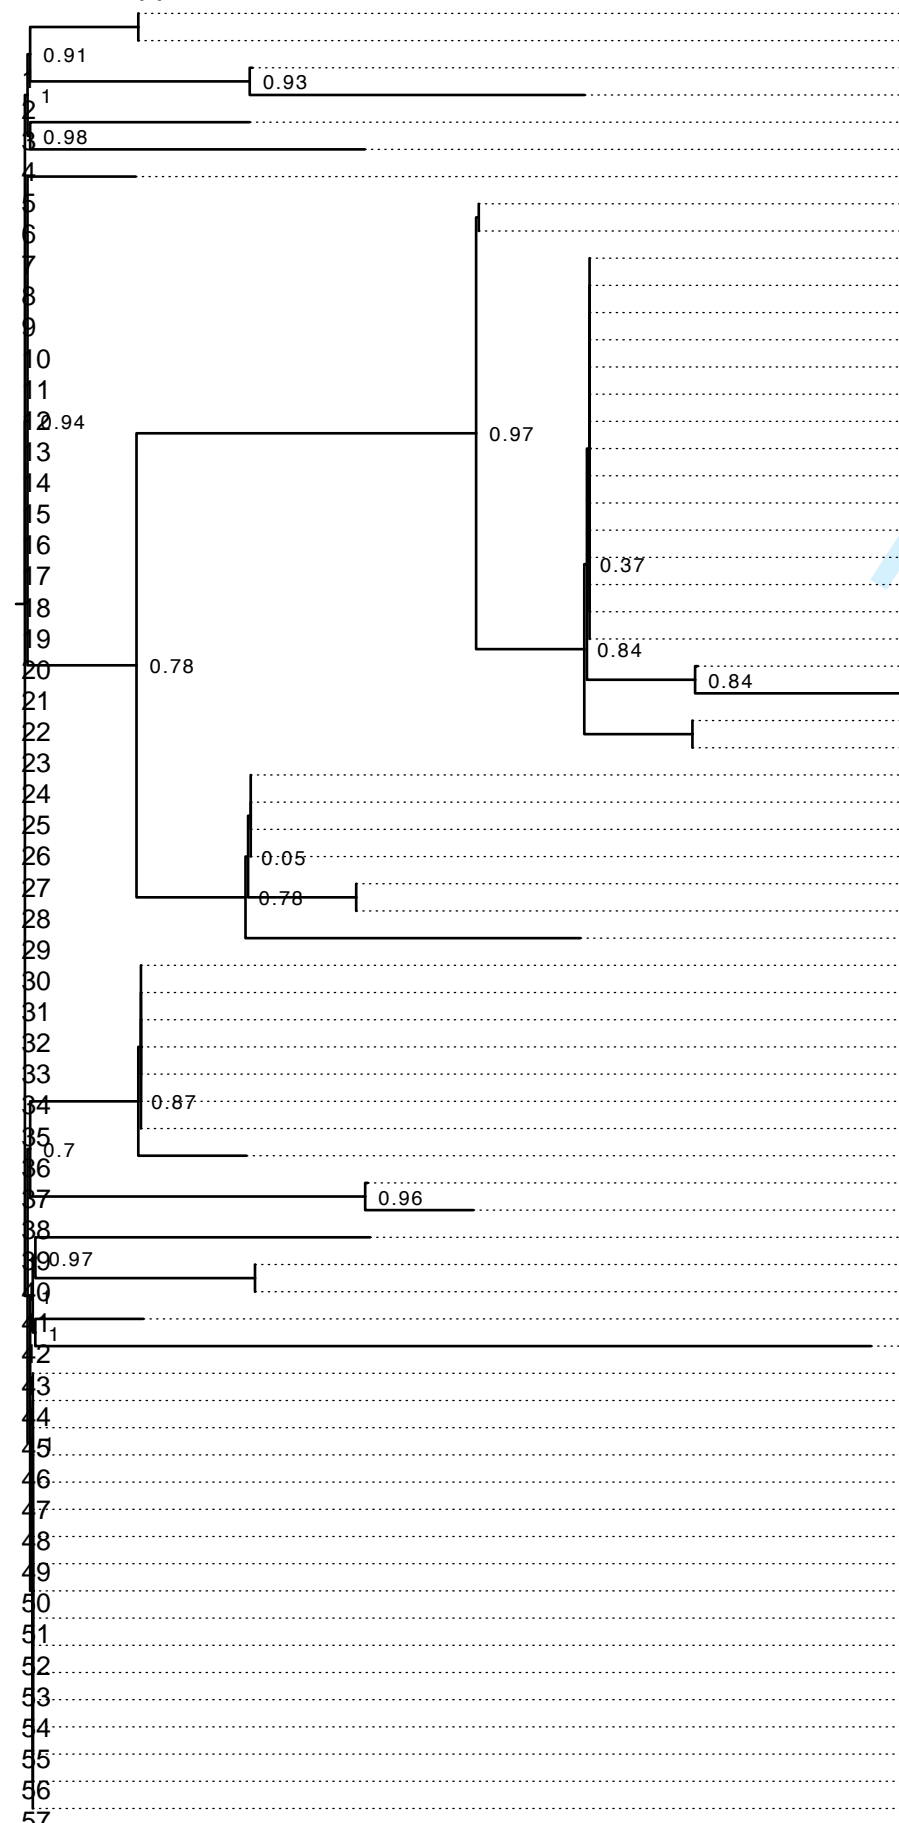

| Sample Number | Patient        | Ward | BMJ | Open of Specimen | Site                 | Date     | TIM | PIP | TAZ | CAZ | AZT | IMI | MER | AMI | GEN | TOB | CIP | COL | pBURNS | Page 28 of 48 |
|---------------|----------------|------|-----|------------------|----------------------|----------|-----|-----|-----|-----|-----|-----|-----|-----|-----|-----|-----|-----|--------|---------------|
| 1067          | SP30           | BCU  | 12  | Water            | Shower (Pre-flush)   | 08/07/13 |     |     |     |     |     |     |     |     |     |     |     |     |        |               |
| 1068          | SP30           | BCU  | 12  | Water            | Shower (Pre-flush)   | 08/07/13 |     |     |     |     |     |     |     |     |     |     |     |     |        |               |
| 991           | Water sampling | BCU  | 10  | Water            | Shower (Pre-flush)   | 18/12/12 |     |     |     |     |     |     |     |     |     |     |     |     |        |               |
| 966           | SP08           | BCU  | 10  | Water            | Shower (Unknown)     | 23/11/12 | R   | S   | S   | S   | I   | S   | S   | S   | S   | S   | S   | S   |        |               |
| 931           | P02            | BCU  | 8   | Environmental    | Shower (Rose)        | 07/11/12 | R   | S   | S   | S   | I   | S   | S   | S   | S   | S   | S   | S   |        |               |
| 1065          | SP30           | BCU  | 12  | Environmental    | Shower (Rose)        | 08/07/13 |     |     |     |     |     |     |     |     |     |     |     |     |        |               |
| 1034          | SP15           | BCU  | 8   | Environmental    | Shower (Rose)        | 14/03/13 | R   | S   | S   | S   | R   | S   | S   | S   | S   | S   | S   | S   | Yes    |               |
| 902           | P01            | BCU  | 11  | Environmental    | Drain                | 16/10/12 |     |     |     |     |     |     |     |     |     |     |     |     |        |               |
| 903           | P01            | BCU  | 11  | Water            | Shower (Post-flush)  | 16/10/12 | R   | S   | S   | S   | I   | S   | S   | S   | S   | S   | S   | S   |        |               |
| 981           | P04            | BCU  | 11  | Environmental    | Drain                | 17/12/12 | R   | S   | S   | S   | I   | S   | S   | S   | S   | S   | S   | S   |        |               |
| 980           | P04            | BCU  | 11  | Environmental    | Shower (Rose)        | 17/12/12 | R   | S   | S   | S   | I   | S   | S   | S   | S   | S   | S   | S   |        |               |
| 1048          | SP20           | BCU  | 11  | Environmental    | Shower (Rose)        | 23/04/13 | R   | S   | S   | S   | I   | S   | S   | S   | S   | S   | S   | S   |        |               |
| 901           | P01            | BCU  | 11  | Environmental    | Trolley              | 16/10/12 | R   | S   | S   | S   | I   | S   | S   | S   | S   | S   | S   | S   |        |               |
| 987           | P04            | BCU  | 11  | Water            | Shower (Hose)        | 17/12/12 | R   | S   | S   | S   | I   | S   | S   | S   | S   | S   | S   | S   |        |               |
| 1050          | SP21           | BCU  | 11  | Water            | Shower (Post-flush)  | 23/04/13 |     |     |     |     |     |     |     |     |     |     |     |     |        |               |
| 988           | P04            | BCU  | 11  | Water            | Shower (Pre-flush)   | 17/12/12 | R   | S   | S   | S   | I   | S   | S   | S   | S   | S   | S   | S   |        |               |
| 968           | SP10           | BCU  | 11  | Water            | Shower (Unknown)     | 23/11/12 | R   | S   | S   | S   | I   | S   | S   | S   | S   | S   | S   | S   |        |               |
| 900           | P01            | BCU  | 11  | Wound swab       | Groin                | 03/10/12 | R   | S   | S   | S   | I   | S   | S   | S   | S   | S   | S   | S   |        |               |
| 979           | P04            | BCU  | 11  | Wound swab       | Anterior right thigh | 11/11/12 | R   | S   | S   | S   | I   | S   | S   | S   | S   | S   | S   | S   |        |               |
| 1008          | P04            | BCU  | 11  | Wound swab       | Anterior right thigh | 31/12/12 | R   | S   | S   | S   | I   | S   | S   | S   | S   | S   | S   | S   |        |               |
| 976           | P04            | BCU  | 11  | Wound swab       | Anterior right shin  | 11/11/12 | R   | S   | S   | S   | I   | S   | S   | S   | S   | S   | S   | S   |        |               |
| 984           | P04            | BCU  | 11  | Wound swab       | Dorsum of left foot  | 13/12/12 | R   | S   | S   | S   | I   | R   | I   | S   | S   | S   | S   | S   |        |               |
| 983           | P04            | BCU  | 11  | Wound swab       | Dorsum of left foot  | 13/12/12 | R   | S   | S   | S   | I   | R   | I   | S   | S   | S   | S   | S   |        |               |
| 982           | P04            | BCU  | 11  | Wound swab       | Dorsum of left foot  | 13/12/12 | R   | S   | S   | S   | I   | S   | S   | S   | S   | S   | S   | S   |        |               |
| 1007          | P04            | BCU  | 11  | Wound swab       | Anterior right thigh | 21/12/12 | R   | S   | S   | S   | I   | R   | I   | S   | S   | S   | S   | S   |        |               |
| 1009          | P04            | BCU  | 11  | Wound swab       | Anterior right thigh | 31/12/12 | R   | S   | S   | S   | I   | S   | S   | S   | S   | S   | S   | S   |        |               |
| 1005          | P04            | BCU  | 11  | Wound swab       | Anterior right thigh | 19/12/12 | R   | S   | S   | S   | I   | R   | I   | S   | S   | S   | S   | S   |        |               |
| 1006          | P04            | BCU  | 11  | Wound swab       | Anterior right thigh | 19/12/12 | R   | S   | S   | S   | I   | R   | I   | S   | S   | S   | S   | S   |        |               |
| 1052          | SP22           | BCU  | 9   | Water            | Shower (Hose)        | 03/05/13 |     |     |     |     |     |     |     |     |     |     |     |     | Yes    |               |
| 993           | Water sampling | BCU  | 9   | Water            | Shower (Hose)        | 18/12/12 | R   | S   | S   | S   | I   | S   | S   | S   | S   | S   | S   | S   |        |               |
| 994           | Water sampling | BCU  | 9   | Water            | Shower (Pre-flush)   | 18/12/12 | R   | S   | S   | S   | I   | S   | S   | S   | S   | S   | S   | S   |        |               |
| 992           | Water sampling | BCU  | 9   | Water            | Tap                  | 18/12/12 | R   | S   | S   | S   | I   | S   | S   | S   | S   | S   | S   | S   |        |               |
| 985           | P04            | BCU  | 11  | Water            | Tap                  | 17/12/12 | R   | S   | S   | S   | I   | S   | S   | S   | S   | S   | S   | S   |        |               |
| 986           | P04            | BCU  | 11  | Water            | Tap                  | 17/12/12 |     |     |     |     |     |     |     |     |     |     |     |     |        |               |
| 967           | SP09           | BCU  | 9   | Water            | Shower (Unknown)     | 23/11/12 | R   | S   | S   | S   | I   | S   | S   | S   | S   | S   | S   | S   | Yes    |               |
| 1062          | SP29           | BCU  | 6   | Environmental    | Shower (Rose)        | 08/07/13 |     |     |     |     |     |     |     |     |     |     |     |     |        |               |
| 1058          | SP25           | BCU  | 6   | Environmental    | Shower (Rose)        | 24/06/13 |     |     |     |     |     |     |     |     |     |     |     |     |        |               |
| 1003          | Water sampling | BCU  | 6   | Water            | Shower (Hose)        | 19/12/12 |     |     |     |     |     |     |     |     |     |     |     |     |        |               |
| 1064          | SP29           | BCU  | 6   | Water            | Shower (Pre-flush)   | 08/07/13 |     |     |     |     |     |     |     |     |     |     |     |     |        |               |
| 1036          | SP15           | BCU  | 6   | Water            | Shower (Pre-flush)   | 15/03/13 |     |     |     |     |     |     |     |     |     |     |     |     |        |               |
| 1004          | Water sampling | BCU  | 6   | Water            | Shower (Pre-flush)   | 19/12/12 |     |     |     |     |     |     |     |     |     |     |     |     |        |               |
| 1057          | SP25           | BCU  | 6   | Water            | Shower (Pre-flush)   | 24/06/13 | R   | S   | S   | S   | I   | S   | S   | S   | S   | S   | S   | S   |        |               |
| 1041          | SP16           | BCU  | 6   | Water            | Shower (Pre-flush)   | 28/03/13 |     |     |     |     |     |     |     |     |     |     |     |     |        |               |
| 999           | Water sampling | BCU  | 1   | Water            | Shower (Hose)        | 19/12/12 |     |     |     |     |     |     |     |     |     |     |     |     |        |               |
| 1000          | Water sampling | BCU  | 1   | Water            | Shower (Pre-flush)   | 19/12/12 |     |     |     |     |     |     |     |     |     |     |     |     |        |               |
| 1010          | SP11           | BCU  | 8   | Environmental    | Sink                 | 10/01/13 |     |     |     |     |     |     |     |     |     |     |     |     | Yes    |               |
| 989           | Water sampling | BCU  | 12  | Water            | Shower (Hose)        | 17/12/12 | R   | S   | S   | S   | I   | S   | S   | S   | S   | S   | S   | S   |        |               |
| 990           | Water sampling | BCU  | 12  | Water            | Shower (Pre-flush)   | 17/12/12 | R   | S   | S   | S   | I   | S   | S   | S   | S   | S   | S   | S   |        |               |
| 1040          | SP16           | BCU  | 6   | Environmental    | Shower (Rose)        | 28/03/13 | R   | S   | S   | S   | I   | S   | S   | S   | S   | S   | S   | S   |        |               |
| 1031          | SP13           | BCU  | 8   | Water            | Shower (Hose)        | 21/02/13 |     |     |     |     |     |     |     |     |     |     |     |     | Yes    |               |
| 1001          | Water sampling | BCU  | 5   | Water            | Tap                  | 19/12/12 |     |     |     |     |     |     |     |     |     |     |     |     |        |               |
| 996           | Water sampling | BCU  | 7   | Water            | Shower (Pre-flush)   | 18/12/12 | R   | S   | S   | S   | I   | S   | S   | S   | S   | S   | S   | S   |        |               |
| 1029          | SP12           | BCU  | 8   | Environmental    | Drain                | 12/02/13 |     |     |     |     |     |     |     |     |     |     |     |     | Yes    |               |
| 933           | P02            | BCU  | 8   | Environmental    | EGC                  | 07/11/12 | R   | S   | S   | S   | I   | S   | S   | S   | S   | S   | S   | S   |        |               |
| 930           | P02            | BCU  | 8   | Environmental    | Shower (Rose)        | 07/11/12 | R   | S   | S   | S   | I   | R   | S   | S   | S   | S   | S   | S   |        |               |
| 1028          | SP12           | BCU  | 8   | Environmental    | Shower (Rose)        | 12/02/13 |     |     |     |     |     |     |     |     |     |     |     |     | Yes    |               |
| 942           | P02            | BCU  | 8   | Environmental    | Shower (Rose)        | 13/11/12 | R   | S   | S   | S   | I   | S   | S   | S   | S   | S   | S   | S   |        |               |
| 941           | P02            | BCU  | 8   | Environmental    | Shower (Rose)        | 13/11/12 | R   | S   | S   | S   | I   | S   | S   | S   | S   | S   | S   | S   |        |               |
| 917           | P02            | BCU  | 8   | Environmental    | Shower (Rose)        | 29/10/12 | S   | S   | S   | S   | I   | S   | S   | S   | S   | S   | S   | S   | Yes    |               |
| 916           | P02            | BCU  | 8   | Environmental    | Shower (Rose)        | 29/10/12 | S   | S   | S   | S   | I   | S   | S   | S   | S   | S   | S   | S   | Yes    |               |
| 934           | P02            | BCU  | 8   | Water            | Shower (Post-flush)  | 07/11/12 | S   | S   | S   | S   | I   | S   | S   | S   | S   | S   | S   | S   | Yes    |               |
| 1030          | SP12           | BCU  | 8   | Water            | Shower (post-flush)  | 12/02/13 |     |     |     |     |     |     |     |     |     |     |     |     | Yes    |               |
| 1035          | SP14           | BCU  | 8   | Water            | Shower (Post-flush)  | 14/03/13 |     |     |     |     |     |     |     |     |     |     |     |     | Yes    |               |
| 910           | P02            | BCU  | 8   | Water            | Shower (Post-flush)  | 29/10/12 | S   | S   | S   | S   | I   | S   | S   | S   | S   | S   | S   | S   | Yes    |               |
| 935           | P02            | BCU  | 8   | Water            | Shower (Pre-flush)   | 07/11/12 | R   | S   | S   | S   | I   | S   | S   | S   | S   | S   | S   | S   | Yes    |               |
| 1046          | SP19           | BCU  | 8   | Water            | Shower (Pre-flush)   | 10/04/13 |     |     |     |     |     |     |     |     |     |     |     |     |        |               |
| 943           | P02            | BCU  | 8   | Water            | Shower (Pre-flush)   | 13/11/12 | S   | S   | S   | S   | I   | S   | S   | S   | S   | S   | S   | S   | Yes    |               |

1 SNP/Indel

For peer review only - <http://bmjopen.bmj.com/site/about/guidelines.xhtml>

| Study Number | Patient        | WCCB | WU Open | Type of Specimen | Site       | Date     | TIM | PIP | TAZ | CAZ | AZT | IMI | MER | AMI | GEN | TOB | CIP | COL |
|--------------|----------------|------|---------|------------------|------------|----------|-----|-----|-----|-----|-----|-----|-----|-----|-----|-----|-----|-----|
| 1069         | Water sampling | WCCB | 11      | Water            | Tap        | 17/07/13 | R   | S   | S   | S   | I   | R   | I   | S   | S   | S   | S   | S   |
| 1045         | SP20           | WCCB | 11      | Environmental    | Tap handle | 11/04/13 |     |     |     |     |     |     |     |     |     |     |     |     |
| 1047         | SP20           | WCCB | 11      | Water            | Tap        | 11/04/13 | R   | S   | S   | S   | I   | R   | I   | I   | R   | S   | S   | S   |
| 1049         | P05            | WCCB | 11      | Sputum           | Sputum     | 28/04/13 |     | I   | I   | S   | I   | I   | I   | I   | R   | S   | S   | S   |
| 1053         | P05            | WCCB | 11      | Water            | Tap        | 08/05/13 | R   | I   | I   | S   | I   | R   | S   | S   | S   | S   | S   | S   |
| 1054         | P05            | WCCB | 11      | Sputum           | Sputum     | 06/05/13 | R   | R   | R   | R   | R   | R   | R   | I   | R   | S   | I   | S   |
| 1056         | P05            | WCCB | 11      | Sputum           | Sputum     | 19/05/13 |     | R   | R   | R   | S   | R   | R   |     | S   | S   | R   | S   |

1 SNP/Indel

1  
2  
3  
4  
5  
6



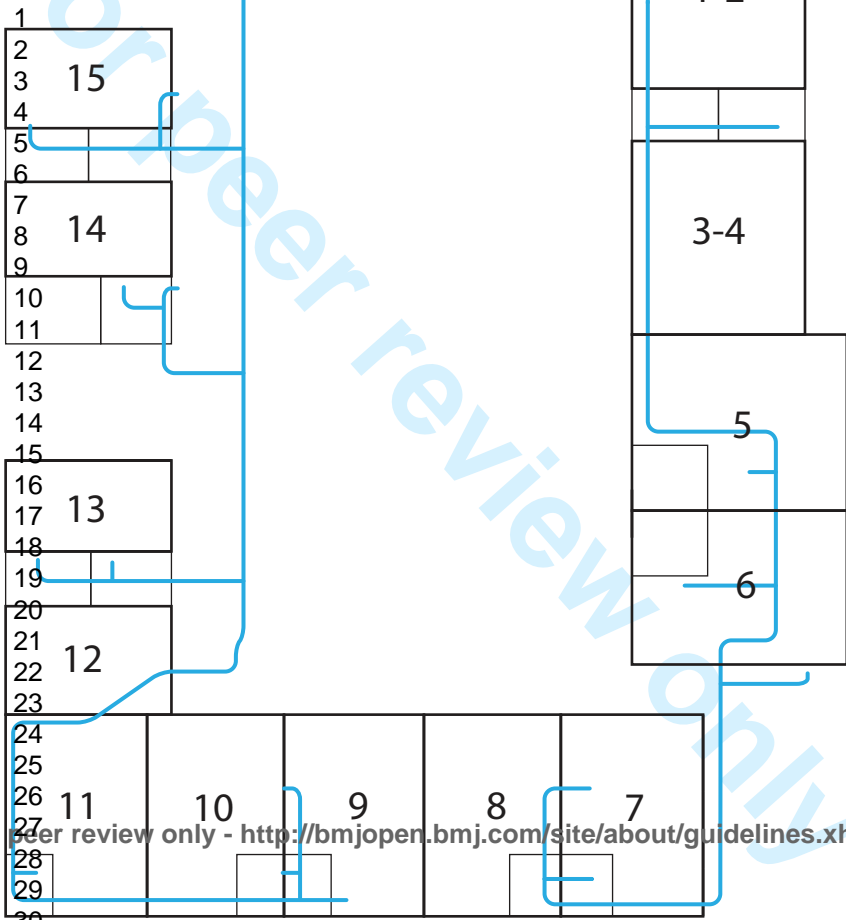

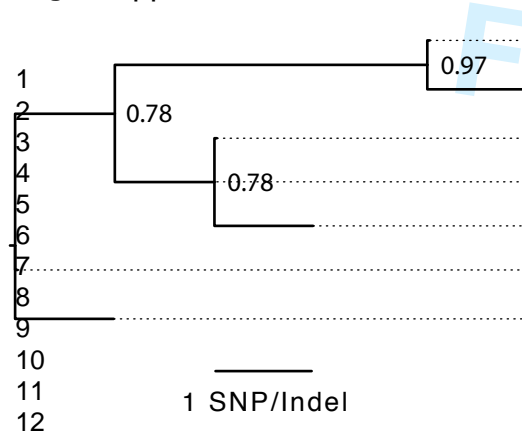

| Bed | Type of Specimen | Alignment                                                                                 |
|-----|------------------|-------------------------------------------------------------------------------------------|
| 11  | Shower           | T CCTACTCC - CACAGACCTAACCT - - - - - G - - ACCGAAATCCTTTTCCG - C GAGGCG                  |
| 11  | Shower           | T CCTACTCC - TACAGACCTAACCT - - - - - G - - ACCGAAATCCTTTTCCG - C GAGGCG                  |
| 9   | Tap              | T GCAACTCC - CACAGACCTAACGT - - - - - G - - ACCGAAATCCTTTTCCG - C GC GGCG                 |
| 9   | TMV              | T GCA - CT - C - CACAGA - - - AACGT - - - - - G - - ACCG - - A - CCTTTTC - G - C - - GGCG |
| 11  | Tap              | T GTA ACTCC - CACAGACCTAACGT - - - - - G - - ACCGAAATCCTTTTCCG - C GC GGCG                |
| 8   | Shower           | T CCAACTCC - CACAGACCTAACGT - - - - - G - - ACCGAAATCCTTTTCCG - C TC GGCG                 |
| 6   | Shower           | T CCAACTCC - CACAGCCTAACGT - - - - - G - - ACCGAAATCCTTTTCCG - C TC GGCG                  |





1  
2  
3  
4  
5  
6  
7  
8  
9  
10  
11  
12  
13  
14  
15  
16  
17  
18  
19  
20  
21  
22  
23  
24  
25  
26  
27  
28  
29  
30  
31  
32  
33  
34  
35  
36  
37  
38  
39  
40  
41  
42  
43  
44  
45  
46  
47

| Study | Year | Age   | Sex | Site | Study design | Outcome | Effect size | 95% CI  | Quality score | Notes |
|-------|------|-------|-----|------|--------------|---------|-------------|---------|---------------|-------|
| 1     | 2008 | 18-24 | M   | USA  | Case-control | MI      | 1.5         | 1.2-1.8 | 10            |       |
| 2     | 2009 | 18-24 | M   | USA  | Case-control | MI      | 1.2         | 1.0-1.4 | 10            |       |
| 3     | 2010 | 18-24 | M   | USA  | Case-control | MI      | 1.8         | 1.5-2.1 | 10            |       |
| 4     | 2011 | 18-24 | M   | USA  | Case-control | MI      | 1.4         | 1.1-1.7 | 10            |       |
| 5     | 2012 | 18-24 | M   | USA  | Case-control | MI      | 1.6         | 1.3-1.9 | 10            |       |
| 6     | 2013 | 18-24 | M   | USA  | Case-control | MI      | 1.3         | 1.0-1.6 | 10            |       |
| 7     | 2014 | 18-24 | M   | USA  | Case-control | MI      | 1.7         | 1.4-2.0 | 10            |       |
| 8     | 2015 | 18-24 | M   | USA  | Case-control | MI      | 1.5         | 1.2-1.8 | 10            |       |
| 9     | 2016 | 18-24 | M   | USA  | Case-control | MI      | 1.4         | 1.1-1.7 | 10            |       |
| 10    | 2017 | 18-24 | M   | USA  | Case-control | MI      | 1.6         | 1.3-1.9 | 10            |       |
| 11    | 2018 | 18-24 | M   | USA  | Case-control | MI      | 1.3         | 1.0-1.6 | 10            |       |
| 12    | 2019 | 18-24 | M   | USA  | Case-control | MI      | 1.7         | 1.4-2.0 | 10            |       |
| 13    | 2020 | 18-24 | M   | USA  | Case-control | MI      | 1.5         | 1.2-1.8 | 10            |       |
| 14    | 2021 | 18-24 | M   | USA  | Case-control | MI      | 1.4         | 1.1-1.7 | 10            |       |
| 15    | 2022 | 18-24 | M   | USA  | Case-control | MI      | 1.6         | 1.3-1.9 | 10            |       |
| 16    | 2023 | 18-24 | M   | USA  | Case-control | MI      | 1.3         | 1.0-1.6 | 10            |       |
| 17    | 2024 | 18-24 | M   | USA  | Case-control | MI      | 1.7         | 1.4-2.0 | 10            |       |
| 18    | 2025 | 18-24 | M   | USA  | Case-control | MI      | 1.5         | 1.2-1.8 | 10            |       |
| 19    | 2026 | 18-24 | M   | USA  | Case-control | MI      | 1.4         | 1.1-1.7 | 10            |       |
| 20    | 2027 | 18-24 | M   | USA  | Case-control | MI      | 1.6         | 1.3-1.9 | 10            |       |
| 21    | 2028 | 18-24 | M   | USA  | Case-control | MI      | 1.3         | 1.0-1.6 | 10            |       |
| 22    | 2029 | 18-24 | M   | USA  | Case-control | MI      | 1.7         | 1.4-2.0 | 10            |       |
| 23    | 2030 | 18-24 | M   | USA  | Case-control | MI      | 1.5         | 1.2-1.8 | 10            |       |
| 24    | 2031 | 18-24 | M   | USA  | Case-control | MI      | 1.4         | 1.1-1.7 | 10            |       |
| 25    | 2032 | 18-24 | M   | USA  | Case-control | MI      | 1.6         | 1.3-1.9 | 10            |       |
| 26    | 2033 | 18-24 | M   | USA  | Case-control | MI      | 1.3         | 1.0-1.6 | 10            |       |
| 27    | 2034 | 18-24 | M   | USA  | Case-control | MI      | 1.7         | 1.4-2.0 | 10            |       |
| 28    | 2035 | 18-24 | M   | USA  | Case-control | MI      | 1.5         | 1.2-1.8 | 10            |       |
| 29    | 2036 | 18-24 | M   | USA  | Case-control | MI      | 1.4         | 1.1-1.7 | 10            |       |
| 30    | 2037 | 18-24 | M   | USA  | Case-control | MI      | 1.6         | 1.3-1.9 | 10            |       |
| 31    | 2038 | 18-24 | M   | USA  | Case-control | MI      | 1.3         | 1.0-1.6 | 10            |       |
| 32    | 2039 | 18-24 | M   | USA  | Case-control | MI      | 1.7         | 1.4-2.0 | 10            |       |
| 33    | 2040 | 18-24 | M   | USA  | Case-control | MI      | 1.5         | 1.2-1.8 | 10            |       |
| 34    | 2041 | 18-24 | M   | USA  | Case-control | MI      | 1.4         | 1.1-1.7 | 10            |       |
| 35    | 2042 | 18-24 | M   | USA  | Case-control | MI      | 1.6         | 1.3-1.9 | 10            |       |
| 36    | 2043 | 18-24 | M   | USA  | Case-control | MI      | 1.3         | 1.0-1.6 | 10            |       |
| 37    | 2044 | 18-24 | M   | USA  | Case-control | MI      | 1.7         | 1.4-2.0 | 10            |       |
| 38    | 2045 | 18-24 | M   | USA  | Case-control | MI      | 1.5         | 1.2-1.8 | 10            |       |
| 39    | 2046 | 18-24 | M   | USA  | Case-control | MI      | 1.4         | 1.1-1.7 | 10            |       |
| 40    | 2047 | 18-24 | M   | USA  | Case-control | MI      | 1.6         | 1.3-1.9 | 10            |       |
| 41    | 2048 | 18-24 | M   | USA  | Case-control | MI      | 1.3         | 1.0-1.6 | 10            |       |
| 42    | 2049 | 18-24 | M   | USA  | Case-control | MI      | 1.7         | 1.4-2.0 | 10            |       |
| 43    | 2050 | 18-24 | M   | USA  | Case-control | MI      | 1.5         | 1.2-1.8 | 10            |       |
| 44    | 2051 | 18-24 | M   | USA  | Case-control | MI      | 1.4         | 1.1-1.7 | 10            |       |
| 45    | 2052 | 18-24 | M   | USA  | Case-control | MI      | 1.6         | 1.3-1.9 | 10            |       |
| 46    | 2053 | 18-24 | M   | USA  | Case-control | MI      | 1.3         | 1.0-1.6 | 10            |       |
| 47    | 2054 | 18-24 | M   | USA  | Case-control | MI      | 1.7         | 1.4-2.0 | 10            |       |

For peer review only

1  
2  
3  
4  
5  
6  
7  
8  
9  
10  
11  
12  
13  
14  
15  
16  
17  
18  
19  
20  
21  
22  
23  
24  
25  
26  
27  
28  
29  
30  
31  
32  
33  
34  
35  
36  
37  
38  
39  
40  
41  
42  
43  
44  
45  
46  
47

| Chromosome | Position | Ref | Alt | Mean depth | No calls | Hom calls | Het calls | Effect                | Effect impact | Functional class | Codon change | Amino acid change | Gene name | 1045 | 1047 | 1049 | 1053 | 1054 | 1056 | 1069 |  |
|------------|----------|-----|-----|------------|----------|-----------|-----------|-----------------------|---------------|------------------|--------------|-------------------|-----------|------|------|------|------|------|------|------|--|
| NC_002516  | 3558951  | G   | A   | 35         | 0        | 1         | 0         | NON_SYNONYMOUS_CODING | MODERATE      | MISSENSE         | aCc/aTc      | T83I              | gyrA      |      |      |      |      |      |      | A    |  |
| NC_002516  | 4166773  | A   | G   | 22         | 0        | 2         | 0         | NON_SYNONYMOUS_CODING | MODERATE      | MISSENSE         | Acg/Gcg      | T86A              | nalC      |      |      |      |      | G    |      | G    |  |

For peer review only

| Patient | Antibiotic/antifungal   | Start      | End        | Start      | End        |
|---------|-------------------------|------------|------------|------------|------------|
| 2       | Ciprofloxacin           | 16/10/2012 | 06/11/2012 |            |            |
|         | Nitrofurantoin          | 16/10/2012 | 11/11/2012 |            |            |
|         | Vancomycin              | 29/10/2012 | 03/11/2012 |            |            |
| 4       | Flucloxacillin          | 23/11/2012 | 30/11/2012 |            |            |
|         | Piperacillin/tazobactam | 30/11/2012 | 03/12/2012 |            |            |
|         | Meropenem               | 03/12/2012 | 08/12/2012 |            |            |
|         | Colistin                | 15/12/2012 | 21/12/2012 |            |            |
| 5       | Gentamycin              | 12/04/2013 | 12/04/2013 |            |            |
|         | Co-amoxiclav            | 13/04/2013 | 14/04/2013 |            |            |
|         | Erthromycin             | 14/04/2013 | 21/04/2013 | 11/05/2013 | 19/05/2013 |
|         | Piperacillin/tazobactam | 14/04/2013 | 18/04/2013 |            |            |
|         | Meropenem               | 20/04/2013 | 08/05/2013 | 19/05/2013 | 20/05/2013 |
|         | Caspofungin             | 26/04/2013 | 14/05/2013 | 20/05/2013 | 21/05/2013 |
|         | Linezolid               | 01/05/2013 | 12/05/2013 |            |            |
|         | Ciprofloxacin           | 06/05/2013 | 16/05/2013 | 20/05/2013 | 21/05/2013 |
|         | Colistin                | 20/05/2013 | 23/05/2013 |            |            |

1  
2  
3  
4  
5  
6  
7  
8  
9  
10  
11  
12  
13  
14  
15  
16  
17  
18  
19  
20  
21  
22  
23  
24  
25  
26  
27  
28  
29  
30  
31  
32  
33  
34  
35  
36  
37  
38  
39  
40  
41  
42  
43  
44  
45  
46  
47

| Gene | Mutation type | Effect         | AA substitution | Resistance phenotype | Samples                     |
|------|---------------|----------------|-----------------|----------------------|-----------------------------|
| gyrA | SNP           | non-synonymous | T83I            | Ciprofloxacin        | 1056                        |
| nalC | indel         | -              | -               | Meropenem            | 1054, 1056                  |
| mexS | SNP           | non-synonymous | H321Y           | Ciprofloxacin        | 908, 909, 919, 925-928, 932 |
| oprD | indel         | frame shift    | -400?           | Imipenem/meropenem   | 1005, 1006                  |

For peer review only



**STROBE 2007 (v4) Statement—Checklist of items that should be included in reports of cohort studies**

| Section/Topic             | Item # | Recommendation                                                                                                                                                                       | Reported on page # |
|---------------------------|--------|--------------------------------------------------------------------------------------------------------------------------------------------------------------------------------------|--------------------|
| <b>Title and abstract</b> | 1      | (a) Indicate the study's design with a commonly used term in the title or the abstract                                                                                               | 3                  |
|                           |        | (b) Provide in the abstract an informative and balanced summary of what was done and what was found                                                                                  | 3-4                |
| <b>Introduction</b>       |        |                                                                                                                                                                                      |                    |
| Background/rationale      | 2      | Explain the scientific background and rationale for the investigation being reported                                                                                                 | 6                  |
| Objectives                | 3      | State specific objectives, including any prespecified hypotheses                                                                                                                     | 7                  |
| <b>Methods</b>            |        |                                                                                                                                                                                      |                    |
| Study design              | 4      | Present key elements of study design early in the paper                                                                                                                              | 8-9                |
| Setting                   | 5      | Describe the setting, locations, and relevant dates, including periods of recruitment, exposure, follow-up, and data collection                                                      | 8                  |
| Participants              | 6      | (a) Give the eligibility criteria, and the sources and methods of selection of participants. Describe methods of follow-up                                                           | 8                  |
|                           |        | (b) For matched studies, give matching criteria and number of exposed and unexposed                                                                                                  | n/a                |
| Variables                 | 7      | Clearly define all outcomes, exposures, predictors, potential confounders, and effect modifiers. Give diagnostic criteria, if applicable                                             | 8-9                |
| Data sources/ measurement | 8*     | For each variable of interest, give sources of data and details of methods of assessment (measurement). Describe comparability of assessment methods if there is more than one group | 8-9                |
| Bias                      | 9      | Describe any efforts to address potential sources of bias                                                                                                                            | n/a                |
| Study size                | 10     | Explain how the study size was arrived at                                                                                                                                            | 9                  |
| Quantitative variables    | 11     | Explain how quantitative variables were handled in the analyses. If applicable, describe which groupings were chosen and why                                                         | n/a                |
| Statistical methods       | 12     | (a) Describe all statistical methods, including those used to control for confounding                                                                                                | ??                 |
|                           |        | (b) Describe any methods used to examine subgroups and interactions                                                                                                                  | n/a                |
|                           |        | (c) Explain how missing data were addressed                                                                                                                                          | n/a                |
|                           |        | (d) If applicable, explain how loss to follow-up was addressed                                                                                                                       | n/a                |
|                           |        | (e) Describe any sensitivity analyses                                                                                                                                                | n/a                |
| <b>Results</b>            |        |                                                                                                                                                                                      |                    |

**Comment [MN1]:** For JAMA it was in eMethods, however not sure where it is going to be now...

1  
2  
3  
4  
5  
6  
7  
8  
9  
10  
11  
12  
13  
14  
15  
16  
17  
18  
19  
20  
21  
22  
23  
24  
25  
26  
27  
28  
29  
30  
31  
32  
33  
34  
35  
36  
37  
38  
39  
40  
41  
42  
43  
44  
45  
46  
47  
48  
49

|                          |     |                                                                                                                                                                                                                                                                                                                                                                                                               |                    |
|--------------------------|-----|---------------------------------------------------------------------------------------------------------------------------------------------------------------------------------------------------------------------------------------------------------------------------------------------------------------------------------------------------------------------------------------------------------------|--------------------|
| Participants             | 13* | (a) Report numbers of individuals at each stage of study—eg numbers potentially eligible, examined for eligibility, confirmed eligible, included in the study, completing follow-up, and analysed<br>(b) Give reasons for non-participation at each stage<br>(c) Consider use of a flow diagram                                                                                                               | 10<br>10<br>-      |
| Descriptive data         | 14* | (a) Give characteristics of study participants (eg demographic, clinical, social) and information on exposures and potential confounders<br>(b) Indicate number of participants with missing data for each variable of interest<br>(c) Summarise follow-up time (eg, average and total amount)                                                                                                                | 10-11<br>10<br>n/a |
| Outcome data             | 15* | Report numbers of outcome events or summary measures over time                                                                                                                                                                                                                                                                                                                                                | 10-11              |
| Main results             | 16  | (a) Give unadjusted estimates and, if applicable, confounder-adjusted estimates and their precision (eg, 95% confidence interval). Make clear which confounders were adjusted for and why they were included<br>(b) Report category boundaries when continuous variables were categorized<br>(c) If relevant, consider translating estimates of relative risk into absolute risk for a meaningful time period | n/a<br>n/a<br>n/a  |
| Other analyses           | 17  | Report other analyses done—eg analyses of subgroups and interactions, and sensitivity analyses                                                                                                                                                                                                                                                                                                                | n/a                |
| <b>Discussion</b>        |     |                                                                                                                                                                                                                                                                                                                                                                                                               |                    |
| Key results              | 18  | Summarise key results with reference to study objectives                                                                                                                                                                                                                                                                                                                                                      | 16                 |
| <b>Limitations</b>       |     |                                                                                                                                                                                                                                                                                                                                                                                                               |                    |
| Interpretation           | 20  | Give a cautious overall interpretation of results considering objectives, limitations, multiplicity of analyses, results from similar studies, and other relevant evidence                                                                                                                                                                                                                                    | 16-18              |
| Generalisability         | 21  | Discuss the generalisability (external validity) of the study results                                                                                                                                                                                                                                                                                                                                         | 18                 |
| <b>Other information</b> |     |                                                                                                                                                                                                                                                                                                                                                                                                               |                    |
| Funding                  | 22  | Give the source of funding and the role of the funders for the present study and, if applicable, for the original study on which the present article is based                                                                                                                                                                                                                                                 | 19                 |

\*Give information separately for cases and controls in case-control studies and, if applicable, for exposed and unexposed groups in cohort and cross-sectional studies.

**Note:** An Explanation and Elaboration article discusses each checklist item and gives methodological background and published examples of transparent reporting. The STROBE checklist is best used in conjunction with this article (freely available on the Web sites of PLoS Medicine at <http://www.plosmedicine.org/>, Annals of Internal Medicine at <http://www.annals.org/>, and Epidemiology at <http://www.epidem.com/>). Information on the STROBE Initiative is available at [www.strobe-statement.org](http://www.strobe-statement.org).

# BMJ Open

## Seeking the source of *Pseudomonas aeruginosa* infections in a recently opened hospital: an observational study using whole-genome sequencing

|                                 |                                                                                                                                                                                                                                                                                                                                                                                                                                                                                                                                                                                                                                                                                                                                                                                                                                                                                                                                                                                                                                                                                                                                                                                                                                                                                                                                                                                                                                                                                           |
|---------------------------------|-------------------------------------------------------------------------------------------------------------------------------------------------------------------------------------------------------------------------------------------------------------------------------------------------------------------------------------------------------------------------------------------------------------------------------------------------------------------------------------------------------------------------------------------------------------------------------------------------------------------------------------------------------------------------------------------------------------------------------------------------------------------------------------------------------------------------------------------------------------------------------------------------------------------------------------------------------------------------------------------------------------------------------------------------------------------------------------------------------------------------------------------------------------------------------------------------------------------------------------------------------------------------------------------------------------------------------------------------------------------------------------------------------------------------------------------------------------------------------------------|
| Journal:                        | <i>BMJ Open</i>                                                                                                                                                                                                                                                                                                                                                                                                                                                                                                                                                                                                                                                                                                                                                                                                                                                                                                                                                                                                                                                                                                                                                                                                                                                                                                                                                                                                                                                                           |
| Manuscript ID:                  | bmjopen-2014-006278.R1                                                                                                                                                                                                                                                                                                                                                                                                                                                                                                                                                                                                                                                                                                                                                                                                                                                                                                                                                                                                                                                                                                                                                                                                                                                                                                                                                                                                                                                                    |
| Article Type:                   | Research                                                                                                                                                                                                                                                                                                                                                                                                                                                                                                                                                                                                                                                                                                                                                                                                                                                                                                                                                                                                                                                                                                                                                                                                                                                                                                                                                                                                                                                                                  |
| Date Submitted by the Author:   | 16-Sep-2014                                                                                                                                                                                                                                                                                                                                                                                                                                                                                                                                                                                                                                                                                                                                                                                                                                                                                                                                                                                                                                                                                                                                                                                                                                                                                                                                                                                                                                                                               |
| Complete List of Authors:       | Quick, Josh; Institute of Microbiology and Infection, University of Birmingham; Queen Elizabeth Hospital, NIHR Surgical Reconstruction and Microbiology Research Centre<br>Cumley, Nicola; Queen Elizabeth Hospital, NIHR Surgical Reconstruction and Microbiology Research Centre<br>Wearn, Chris; University Hospital Birmingham Foundation Trust, Healing Foundation Centre for Burns Research; Queen Elizabeth Hospital, NIHR Surgical Reconstruction and Microbiology Research Centre<br>Niebel, Marc; Queen Elizabeth Hospital, NIHR Surgical Reconstruction and Microbiology Research Centre<br>Constantinidou, Chrystala; University of Warwick, Division of Microbiology and Immunology<br>Thomas, Chris; University of Birmingham, Institute of Microbiology and Infection<br>Pallen, Mark; University of Warwick, Division of Microbiology and Immunology<br>Moiemen, Naiem; Queen Elizabeth Hospital, NIHR Surgical Reconstruction and Microbiology Research Centre; University Hospital Birmingham Foundation Trust, Healing Foundation Centre for Burns Research<br>Bamford, Amy; Queen Elizabeth Hospital, NIHR Surgical Reconstruction and Microbiology Research Centre; University Hospital Birmingham Foundation Trust, Healing Foundation Centre for Burns Research<br>Oppenheim, Beryl; Queen Elizabeth Hospital, NIHR Surgical Reconstruction and Microbiology Research Centre<br>Loman, Nicholas; University of Birmingham, Institute of Microbiology and Infection |
| <b>Primary Subject Heading</b>: | Genetics and genomics                                                                                                                                                                                                                                                                                                                                                                                                                                                                                                                                                                                                                                                                                                                                                                                                                                                                                                                                                                                                                                                                                                                                                                                                                                                                                                                                                                                                                                                                     |
| Secondary Subject Heading:      | Infectious diseases, Pathology, Public health, Surgery                                                                                                                                                                                                                                                                                                                                                                                                                                                                                                                                                                                                                                                                                                                                                                                                                                                                                                                                                                                                                                                                                                                                                                                                                                                                                                                                                                                                                                    |
| Keywords:                       | Microbiology < BASIC SCIENCES, BIOTECHNOLOGY & BIOINFORMATICS, Molecular diagnostics < INFECTIOUS DISEASES, Infection control < INFECTIOUS DISEASES, MICROBIOLOGY, Plastic & reconstructive surgery < SURGERY                                                                                                                                                                                                                                                                                                                                                                                                                                                                                                                                                                                                                                                                                                                                                                                                                                                                                                                                                                                                                                                                                                                                                                                                                                                                             |
|                                 |                                                                                                                                                                                                                                                                                                                                                                                                                                                                                                                                                                                                                                                                                                                                                                                                                                                                                                                                                                                                                                                                                                                                                                                                                                                                                                                                                                                                                                                                                           |

1  
2  
3  
4  
5  
6  
7  
8  
9  
10  
11  
12  
13  
14  
15  
16  
17  
18  
19  
20  
21  
22  
23  
24  
25  
26  
27  
28  
29  
30  
31  
32  
33  
34  
35  
36  
37  
38  
39  
40  
41  
42  
43  
44  
45  
46  
47  
48  
49  
50  
51  
52  
53  
54  
55  
56  
57  
58  
59  
60

SCHOLARONE™  
Manuscripts

For peer review only

**Title**

Seeking the source of *Pseudomonas aeruginosa* infections in a recently opened hospital: an observational study using whole-genome sequencing

**Authors**

Joshua Quick <sup>1,2\*</sup>, Nicola Cumley <sup>2\*</sup>, Christopher M. Wearn <sup>2,3</sup>, Marc Niebel <sup>2</sup>,  
Chrystala Constantinidou <sup>4</sup>, Chris M Thomas <sup>1</sup>, Mark J. Pallen <sup>4</sup>, Naiem S. Moiemem  
<sup>2,3</sup>, Amy Bamford <sup>2,3</sup>, Beryl Oppenheim <sup>2#</sup>, Nicholas J. Loman <sup>1#</sup>

**Affiliations**

<sup>1</sup>Institute of Microbiology and Infection, University of Birmingham, Birmingham,  
United Kingdom

<sup>2</sup>NIHR Surgical Reconstruction and Microbiology Research Centre, Queen Elizabeth  
Hospital, Birmingham, United Kingdom

<sup>3</sup>Healing Foundation Centre for Burns Research, University Hospital Birmingham  
Foundation Trust, Birmingham, United Kingdom

<sup>4</sup>Division of Microbiology and Immunology, University of Warwick, Warwick, United  
Kingdom

\*Contributed equally

**Correspondence:**

Dr Nicholas James Loman

Institute of Microbiology and Infection, University of Birmingham, Birmingham, B15  
2TT United Kingdom

1  
2  
3 Telephone: +44 (0) 121 414 8849  
4  
5

6 Email: [n.j.loman@bham.ac.uk](mailto:n.j.loman@bham.ac.uk)  
7  
8

9 Dr Beryl Oppenheim  
10

11  
12 Clinical Microbiology, University Hospitals Birmingham NHS Foundation Trust  
13

14 Queen Elizabeth Hospital Birmingham, Mindelsohn Way, Edgbaston  
15

16 Birmingham, B15 2WB  
17  
18

19  
20 Telephone: +44 (0) 121 371 6523  
21

22 Email: [Beryl.Oppenheim@uhb.nhs.uk](mailto:Beryl.Oppenheim@uhb.nhs.uk)  
23  
24

25 **Keywords**  
26

27  
28 High-Throughput DNA sequencing; Pseudomonas aeruginosa; Burns, Hydrotherapy  
29  
30

31 **Word Count**  
32

33 4539  
34  
35  
36  
37  
38  
39  
40  
41  
42  
43  
44  
45  
46  
47  
48  
49  
50  
51  
52  
53  
54  
55  
56  
57  
58  
59  
60

## ABSTRACT

### Objectives

*Pseudomonas aeruginosa* is a common nosocomial pathogen responsible for significant morbidity and mortality internationally. Patients may become colonised or infected with *P. aeruginosa* after exposure to contaminated sources within the hospital environment. The aim of this study was to determine whether whole-genome sequencing (WGS) can be used to determine the source in a cohort of burns patients at high risk of *P. aeruginosa* acquisition.

### Study design

An observational prospective cohort study.

### Setting

Burns care ward and critical care ward in the United Kingdom.

### Participants

Patients with >7% total burns by surface area were recruited into the study.

### Methods

All patients were screened for *P. aeruginosa* on admission and samples taken from their immediate environment, including water. Screening patients who subsequently developed a positive *P. aeruginosa* microbiology result were subject to enhanced environmental surveillance. All isolates of *P. aeruginosa* were whole-genome sequenced. Sequence analysis looked at similarity and relatedness between isolates.

### Results

1  
2  
3 Whole-genome sequences for 141 *P. aeruginosa* isolates were obtained from  
4 patients, hospital water and the ward environment. Phylogenetic analysis revealed  
5 eight distinct clades, with a single clade representing the majority of environmental  
6 isolates in the burns unit. Isolates from three patients had identical genotypes  
7 compared with water isolates from the same room. There was clear clustering of  
8 water isolates by room and outlet, allowing the source of acquisitions to be  
9 unambiguously identified. Whole-genome shotgun sequencing of biofilm DNA  
10 extracted from a thermostatic mixer valve revealed this was the source of a *P.*  
11 *aeruginosa* subpopulation previously detected in water. In the remaining two cases  
12 there was no clear link to the hospital environment.  
13  
14  
15  
16  
17  
18  
19  
20  
21  
22  
23  
24

## 25 **Conclusions**

26  
27  
28 This study reveals that WGS can be used for source tracking of *P. aeruginosa* in a  
29 hospital setting, and that acquisitions can be traced to a specific source within a  
30 hospital ward.  
31  
32  
33  
34  
35  
36  
37  
38  
39  
40  
41  
42  
43  
44  
45  
46  
47  
48  
49  
50  
51  
52  
53  
54  
55  
56  
57  
58  
59  
60



## ARTICLE SUMMARY

### Strengths and limitations of the study

- We have demonstrated that whole-genome sequencing can be used for source tracking of *P. aeruginosa* in a hospital setting.
- We show convincing evidence that transmission has occurred directly from water to patients, but other routes are as likely.
- The main limitation of the study was the sample size, which could be attributable to interventions being carried out during the study.
- Our study focused on a burns unit and critical care unit in a newly built hospital. Modes of *P. aeruginosa* transmission may be different in hospitals with different styles of plumbing and on other augmented care units.

## INTRODUCTION

*Pseudomonas aeruginosa* is a ubiquitous Gram-negative bacterium and an important opportunistic pathogen in the healthcare setting. *P. aeruginosa* particularly affects those with impaired host or mucosal immunity and has a broad range of presentations including respiratory infections in cystic fibrosis and mechanically ventilated patients, bloodstream infections in premature neonates and wounds in burns injuries. Nosocomial *P. aeruginosa* outbreaks are frequently reported and associated with water sources such as taps, showers, mixer valves and flow straighteners, sink traps and drains.[1-10] Other potential routes of transmission include cross-infection, for example carriage on the hands of health care workers, and through contaminated medical equipment such as endoscopic devices.[3,5]

In the UK, the role of water in the transmission of *P. aeruginosa* in healthcare settings has become a matter of urgent concern in response to a recent high-profile outbreak affecting a neonatal critical care unit in Belfast in 2012.[11] This source was eventually determined to be sink taps.[11-13] National guidance is now in place detailing enhanced procedures for routine water sampling on augmented care units, with directed interventions such as disinfection and replacement of high-risk plumbing parts required.[14]

Historical phenotypic typing methods for *P. aeruginosa* such as O-antigen serotyping have more recently been replaced by molecular typing methods such as pulsed-field gel electrophoresis (PFGE), variable number tandem repeat analysis (VNTR) and random amplification of polymorphic DNA (RAPD) and multi-locus sequencing typing (MLST).[15] These methods have been used to investigate outbreaks of *P. aeruginosa* within hospitals.[4,16-18] However, such techniques have important

1  
2  
3 limitations for source tracking of infections in hospitals as they sample limited  
4 numbers of sites in the genome which may result in false clustering of unrelated  
5 strains.[19] In the past five years, whole-genome sequencing (WGS) has started to  
6 be used to investigate outbreaks in hospitals. WGS is attractive because of its digital,  
7 sharable format and ultra-high resolution, which is able to discriminate two isolates  
8 differing by just a single mutation. WGS has been successfully used to determine  
9 likely transmission chains during outbreaks of *Staphylococcus aureus*, *Acinetobacter*  
10 *baumannii* and *Klebsiella pneumoniae*. [19-21] Benchtop sequencing instruments  
11 now offer a cost-effective approach for bringing bacterial WGS to the clinical  
12 environment. [1,22]  
13  
14  
15  
16  
17  
18  
19  
20  
21  
22  
23  
24  
25

26 In this study, we explore the utility of WGS to determine the likely sources of *P.*  
27 *aeruginosa* in an at-risk population of burns patients. In the UK and US burns  
28 patients receive shower cart hydrotherapy as a mainstay of burns treatment. [23-26]  
29 A previous hospital audit suggested that up to one-third of such patients became  
30 colonised with *P. aeruginosa*. We hypothesised that this high rate of acquisition may  
31 relate to transmission from hospital shower water during therapy. We therefore  
32 wished to understand the importance of transmission from water compared with  
33 alternative routes such as cross-infection and endogenous carriage.  
34  
35  
36  
37  
38  
39  
40  
41  
42  
43  
44  
45  
46  
47  
48  
49  
50  
51  
52  
53  
54  
55  
56  
57  
58  
59  
60

## MATERIALS AND METHODS

### Hospital setting

An observational, prospective study design was employed in a burns centre serving approximately 13.7 million people across the Midlands region of England with 300 admissions annually. Opened in June 2010, the burns centre comprises a purpose built 15-bed ward with 11 side-rooms and 2 dual-bedded rooms. Patients requiring mechanical ventilation and organ support are usually treated in two self-contained burns cubicles located within the trauma critical care unit (CCU). Despite the observational nature of the study, sampling was carried out during implementation of interim national guidance on control of *P. aeruginosa* issued by the Department of Health. These guidelines were issued in draft form March 2012, and subsequently revised in March 2013. This meant that parallel water sampling and engineering interventions were being undertaken during the period of study. In addition, some enhanced infection prevention measures were also introduced in response to an outbreak of a multi-drug resistant *A. baumannii*.

### Study design and patient selection

Ethical approval was sought and received from the National Research Ethics Service committee in the West Midlands (reference number 12/WM/0181). Patients admitted to the burns unit were eligible for the screening phase of the study if they had burns injuries covering greater than 7% total body surface area (TBSA). Patients were screened as soon as possible after admission after they had given written informed consent. When appropriate, legal consultee advice was sought for patients lacking capacity due to emergency treatment. On admission, recruited patients were screened for carriage of *P. aeruginosa* (wounds, urine and stool) using standard

1  
2  
3 microbiology techniques. Samples were then taken as part of routine microbiology  
4 service during the patients stay. Environmental and water samples were taken after  
5 the patient was admitted to the burns centre. If during the period of stay *P.*  
6  
7  
8  
9  
10 *aeruginosa* was isolated from a patient sample the patient was recruited into the  
11 second phase of the study. In this phase, patients had wound swabs taken at each  
12 dressing change as well as twice-weekly urine samples. The patient's environment  
13 and water from outlets in their bed space were sampled weekly for the duration of  
14 their stay, and after discharge (post-cleaning). Termination of the study was planned  
15 after 30 screening patient admissions, or a year, whichever came soonest, after  
16 which 10 patients were expected to acquire *P. aeruginosa*. This prediction was  
17 based on a previous local audit which suggested about one-thirds of burns patients  
18 became colonised with *P. aeruginosa*..  
19  
20  
21  
22  
23  
24  
25  
26  
27  
28  
29

### 30 **Microbiological and molecular methods**

31  
32  
33 *P. aeruginosa* isolates were obtained from wound swab, urine, stool, environmental  
34 and water samples. *P. aeruginosa* was isolated from wound swabs, urine and stool  
35 by inoculation onto cysteine lactose electrolyte deficient agar (CLED) and cetrimide  
36 agar and incubation for 24 hours at 37°C. Stool samples were cultured overnight in a  
37 cetrimide enrichment broth before subculture onto CLED. Identification was  
38 confirmed by resistance to C-390 and the VITEK® 2 GN identification card. Antibiotic  
39 sensitivity assays were performed using the VITEK® 2 AST N-210 card (bioMérieux,  
40 Basingstoke, UK).  
41  
42  
43  
44  
45  
46  
47  
48  
49  
50

51  
52 The patient's environment (shower head rosette, drain, shower chair or trolley,  
53 bedside table, patient chair, instruments in contact with the patient) was sampled  
54 over a 10cm<sup>2</sup> area by a Polywipes™ sponge. The sponge was placed in tryptic soy  
55  
56  
57  
58  
59  
60

1  
2  
3 broth incubated for 24 hours at 37°C then sub-cultured onto CLED and cetrimide  
4  
5 agar. During water sampling, water was taken from the patient's shower, or tap if a  
6  
7 shower was not present. Shower heads were not removed for water sampling. At  
8  
9 least 200ml of water was collected into a vessel containing sodium thiosulphate as a  
10  
11 neutraliser. In duplicate, 100ml of water was filtered through a 0.45 micron filter and  
12  
13 the filters placed onto CLED plates and cetrimide agar. Plates were incubated at  
14  
15 37°C for 48 hours and the number of organisms per 100ml quantified.  
16  
17

18  
19 For storage and DNA extraction a single colony was purified from the primary culture  
20  
21 plate. When different colony morphologies were observed, a single colony from each  
22  
23 type was purified. Additionally, for a randomly selected water sample, 24 colonies  
24  
25 were individually picked from one water-filter primary microbiological plate for  
26  
27 sequencing. Isolates were stored on Biobank beads at -20°C prior to DNA extraction.  
28  
29 Organisms were resuscitated on CLED agar plates and genome DNA either  
30  
31 extracted directly using the MOBIO UltraClean Microbial DNA Kit, or from overnight  
32  
33 LB broth culture using a Qiagen Genomic-Tip 100G.  
34  
35  
36  
37

### 38 **DNA extraction and sequencing**

39  
40 Genomic DNA was prepared from single colony picks using the MIOBIO Ultraclean  
41  
42 microbial kit (MOBIO, Carlsbad, USA). 1ng input DNA, as quantified by Qubit (Life  
43  
44 Technologies, Carlsbad, USA) was used to prepare genomic libraries for sequencing  
45  
46 using the Illumina Nextera XT™ DNA sample kit as per manufacturer's protocol  
47  
48 (Illumina, San Diego, USA). Libraries were sequenced on the Illumina MiSeq using a  
49  
50 paired-end protocol resulting in read lengths between 150 and 300 bases. A single  
51  
52 additional sample, isolate 910, was chosen as a representative member of Clade 5  
53  
54 for long-read sequencing. DNA from this sample was fragmented using a  
55  
56  
57  
58  
59  
60

1  
2  
3 Hydroshear (Digilab, Marlborough, MA) using the recommended protocol for 10kb  
4 fragments and further size-selected on a Blue Pippin instrument (Sage Science,  
5 MA) with a 7kb minimum size cut-off. The library was sequenced on two SMRT Cells  
6 using the Pacific Biosciences RS II instrument at the Norwegian Sequencing Centre,  
7 Oslo. C4-P2 chemistry was chosen because it favours long, more accurate reads for  
8 *de novo* assembly.  
9  
10  
11  
12  
13  
14  
15

### 16 17 **Stool PCR**

18  
19 For simple presence/absence detection of *P. aeruginosa* in stool samples using  
20 PCR, a stool sample was collected into a stool collection tube containing stool DNA  
21 stabilizer. Total DNA was extracted using the PSP Spin Stool DNA Plus kit (Strattec  
22 Molecular). PCR amplification of species specific regions of the 16S rDNA gene was  
23 carried out using primers PA-SS-F: GGGGGATCTTCGGACCTCA and PA-SS-R:  
24 TCCTTAGAGTGCCACCCG [12] in the following conditions: 0.5µM of each primer,  
25 1.5mM MgCl<sub>2</sub>, 0.2mM dNTP's using BIOTAQ™ DNA Polymerase and buffer set.  
26 After initial denaturation at 96°C for 2 minutes, 30 cycles of 96°C for 30 seconds, 62°  
27 C for 30 seconds and 72°C for 30 seconds were completed with a final extension of  
28 72°C for 5 minutes. Products were visualised for size on an 1.5% agarose gel.  
29  
30  
31  
32  
33  
34  
35  
36  
37  
38  
39  
40  
41  
42

### 43 **Bioinformatics methods**

44  
45  
46 Illumina MiSeq reads from each isolate were adapter and quality trimmed before use  
47 with Trimmomatic.[27] Phylogenetic reconstruction of isolates sequenced in this  
48 study were combined with data from a global collection of 55 *P. aeruginosa* strains  
49 collected world-wide which have been previously analysed by Stewart et al. [28] For  
50 each of the published strains, 600,000 paired-end reads of length 250 bases were  
51 simulated using wgsim (<https://github.com/lh3/wgsim>) from the complete or draft  
52  
53  
54  
55  
56  
57  
58  
59  
60

1  
2  
3 genome assembly deposited in Genbank. Read sets were mapped against the *P.*  
4 *aeruginosa* PAO1 reference genome using BWA-MEM 0.7.5a-r405 using default  
5 settings.[29] Single nucleotide polymorphisms were called using VarScan 2.3.6 and  
6 filtered for regions with an excessive number of variants. These may represent  
7 regions of recombination, misalignments or strong Darwinian selection.[30] FastTree  
8 (version 2.1.7) was used for phylogenetic reconstruction. This software estimates an  
9 approximate maximum-likelihood tree under the Jukes-Cantor model of nucleotide  
10 evolution with a single rate for each site (CAT).[31] Trees were drawn in FigTree  
11 (<http://tree.bio.ed.ac.uk/software/figtree/>).

12  
13  
14 For *in silico* MLST prediction, trimmed reads were assembled *de novo* using Velvet  
15 [32] with a k-mer size of 81 and searched using nucleotide BLAST against the multi-  
16 locus sequence database downloaded from the pubMLST website on 2013-08-05  
17 (<http://pubmlst.org/paeruginosa/>) [33]. For Clade E isolates, in order to exhaustively  
18 search for discriminatory mutations, a nearly complete reference genome was  
19 generated by *de novo* assembly using Pacific Biosciences sequencing data. Reads  
20 were assembled using the 'RS\_HGAP\_Assembly.3' pipeline within SMRT Portal  
21 v2.2.0. Illumina reads from the same sample were mapped to this draft genome  
22 assembly in order to correct remaining indel errors in the assembly using Pilon  
23 (<http://www.broadinstitute.org/software/pilon/>). Isolates belonging to each clade were  
24 mapped individually against either the PacBio reference (Clade E) or *P. aeruginosa*  
25 PAO1 (NC\_002516) (Clades C, D and G).

26  
27  
28 Variants (single nucleotide polymorphisms and short insertion-deletions) were called  
29 using SAMtools mpileup and VarScan with an allele frequency threshold of 80%.**[30]**  
30  
31 Non-informative positions and regions of putative recombination were removed, the  
32  
33  
34  
35  
36  
37  
38  
39  
40  
41  
42  
43  
44  
45  
46  
47  
48  
49  
50  
51  
52  
53  
54  
55  
56  
57  
58  
59  
60



1  
2  
3 later with a variant density filter of more than 3 SNPs every 1000 nucleotides.  
4  
5 Analysing samples in each clade individually maximised the number of variants  
6  
7 detected by reducing the likelihood of the position being uncovered by a subset of  
8  
9 samples. From these variants fine-grained phylogenetic trees were reconstructed for  
10  
11 each clade using FastTree. The scripts used to perform this analysis are available at  
12  
13 [http://www.github.com/joshquick/snp\\_calling\\_scripts](http://www.github.com/joshquick/snp_calling_scripts). Approximate-maximum-  
14  
15 likelihood phylogenetic trees were generated using FastTree and visualised in  
16  
17 FigTree. For whole-genome shotgun metagenomics analysis, reads were analysed  
18  
19 using the Kraken taxonomic classifier software with the supplied *minikraken*  
20  
21 database.<sup>[34]</sup> Reads from the metagenomics dataset were aligned to *P. aeruginosa*  
22  
23 PAO1 as in the previous section and phylogenetic placement was carried out using  
24  
25 pplacer in conjunction with FastTree.<sup>[35]</sup> Sequence data is available from the  
26  
27 European Nucleotide Archive for the Illumina data (ERP006056) and the corrected  
28  
29 Pacific Biosciences assembly (ERP006058).  
30  
31  
32  
33

## 34 RESULTS

### 35 Study results

36  
37 Recruitment lasted a period of 300 days, ending according to protocol after the  
38  
39 enrolment of 30 screening patients. In total, we detected *P. aeruginosa* in five  
40  
41 patients. Of these patients, three had *P. aeruginosa* detected only in burns wound  
42  
43 swabs, one had *P. aeruginosa* detected in both their burns wound and in their urine,  
44  
45 and one had *P. aeruginosa* in their sputum. One additional eligible patient did not  
46  
47 consent to enter the study and was excluded. The average age in the study group  
48  
49 was 41 years. Males predominated with a male-to-female ration of 2.3:1. Flame  
50  
51 burns were the most common mechanism of injury, followed by scalds and mixed  
52  
53 flame/flash injuries. The average burn size of the study group was 12.5% of the total  
54  
55  
56  
57  
58  
59  
60

1  
2  
3 body surface area (TBSA) and 27% of patients sustained an inhalation injury. Eight  
4  
5 patients required admission to ITU and the majority required surgical treatment of  
6  
7 their burns with excision and skin grafting (80%). A large majority of the study group  
8  
9 (83%) received shower cart hydrotherapy as a routine part of their wound  
10  
11 management to encourage healing through wound debridement and  
12  
13 decontamination. The average length of hospital stay (LOS) was 17 days and taking  
14  
15 into account burn size, the average was 1.4 days per % TBSA.  
16  
17  
18

19  
20 **The water and environment in burns and critical care units are frequently**  
21  
22 **colonised by *P. aeruginosa***  
23

24 A total of 282 water and environmental samples were screened for *P. aeruginosa* of  
25  
26 which 39/78 (50%) were positive in water samples, 25/96 (26%) were positive from  
27  
28 the wet environment and 7/108 (6%) were positive from the dry environment. A total  
29  
30 of 86 genome sequences were generated from the 71 positives, as in some cases  
31  
32 multiple colony picks were sequenced. 78 patient samples were screened for *P.*  
33  
34 *aeruginosa* of which 39 (50%) were positive. A total of 55 genome sequences were  
35  
36 generated, as in some cases multiple colony picks were sequenced. In total, 141  
37  
38 genomes were sequenced; water and environmental (n=86) and patient (n=55).  
39  
40 Genomes were sequenced to a mean coverage of 24.4x, with the minimum  
41  
42 coverage of a sample being 14x and highest 64.7x.  
43  
44  
45  
46

47 When placed in the context of a global collection of *P. aeruginosa* strains,  
48  
49 phylogenetic reconstruction demonstrated isolates in our study fell into eight clades  
50  
51 (figure 1, Panel A). As has been reported previously, there was no strong association  
52  
53 between ecological context and position in the phylogenetic tree.[28] Isolates in this  
54  
55 study are most closely related to strains from a variety of settings. The majority of  
56  
57  
58  
59  
60

1  
2  
3 isolates (52%) belong to Clade E (figure 1 Panel B), whose nearest sequenced  
4 relative is the Liverpool Epidemic Strain, a clone often isolated from patients in the  
5 UK and Canada with cystic fibrosis. [36,37] Isolates from Clade E were found in the  
6 burns unit's water and the ward environment, as well as from two patient's wounds.  
7  
8 However it was never detected in the critical care unit. Clade E was detected  
9  
10 throughout the study in a total of 10 different rooms (figure 2).  
11  
12  
13  
14  
15  
16

### 17 **Inferring potential transmission events by whole-genome sequencing**

18  
19 Microevolutionary changes occurring over rapid time-scales (i.e. days to months)  
20 have been used to detect potential chains of transmission in hospital and community  
21 outbreaks.[19-21,38,39] The number of distinct mutations between given isolates  
22 has been used to infer whether transmission events are likely to have occurred.  
23  
24 Such inferences are aided by prior knowledge of mutation rates in similar  
25 populations. Two patients (1 and 4) in our study both had *P. aeruginosa* from Clade  
26 E isolated from their wounds. These isolates had an indistinguishable genotype from  
27 those present in water and the environment of the room they were nursed within  
28 (figure 1 Panel C and figure 3). This genotype was detected in the patient's shower  
29 water after initial patient screening, during screening of the second patient  
30 admission, twice during the second patient's stay and then 127 days later (days 27,  
31 65, 89 and 216 respectively). When water isolates were positive, the genotype was  
32 also detected in wet environment sites (shower drain, shower rosette and patient's  
33 trolley) on the same days.  
34  
35  
36  
37  
38  
39  
40  
41  
42  
43  
44  
45  
46  
47  
48  
49  
50

51  
52 Patient 5 was nursed on the critical care unit due to concomitant medical problems.  
53  
54 *P. aeruginosa* belonging to Clade G was isolated from sputum during this time.  
55  
56  
57  
58  
59  
60

1  
2  
3 Identical genotypes were detected contemporaneously in the water from the  
4 associated sink and sink tap handle (see online supplementary appendix 4).  
5  
6  
7

8 Two further patients (patients 2 and 3) were positive for *P. aeruginosa*. Isolates from  
9 these patients belonged to Clade C and D respectively. Neither clade was ever  
10 isolated from hospital water. In both cases, identical genotypes were detectable in  
11 the environment associated with the patient but these were not detected before or  
12 after the patients' stay, indicating that the environment was not persistently  
13 contaminated. During the course of patient 3's stay, the dry environment such as the  
14 bedside table was contaminated, as was the patient's door handle and shower chair.  
15 However, after patient discharge, the strain associated with this patient was never  
16 seen again during the course of the study in any location.  
17  
18  
19  
20  
21  
22  
23  
24  
25  
26  
27  
28

### 29 **Whole-genome sequencing permits source tracking of *P. aeruginosa* to** 30 **individual water outlets** 31 32

33  
34 Whole-genome sequencing has been reported previously for source tracking, but  
35 never for the detection of transmission events from hospital water.[40] Phylogenetic  
36 reconstruction within Clade E, the most commonly detected water clone  
37 demonstrated additional diversity within this clone, with a total of 46 mutations  
38 detected an average genetic distance between isolates of 4.1 mutations (figure 3).  
39 The reconstruction demonstrated clear evidence of clustering of genotypes both by  
40 room and outlet (figure 3). When *P. aeruginosa* was detected in the wet environment  
41 (e.g. shower rosettes and drains) these genotypes were most often identical to those  
42 found in water, indicating that the water was likely the ultimate source of that clone.  
43 Genotypic variation was seen between outlets within the same room. For example,  
44 tap water sampled from room 11 had a distinct genotype from that sampled from  
45  
46  
47  
48  
49  
50  
51  
52  
53  
54  
55  
56  
57  
58  
59  
60

1  
2  
3 shower water in the same room and this was consistently found over multiple  
4  
5 samplings. Notably, isolates from two patients fell within the cluster originating from  
6  
7 shower water, indicating that shower hydrotherapy was the most likely source of  
8  
9 infection. Two plasmids (designated pBURNS1 and pBURNS2) were detected in this  
10  
11 study set, which both demonstrated geographical clustering, with pBURNS1 only  
12  
13 being detectable in isolates from room 8 and pBURNS2 only being detectable in  
14  
15 isolates from the shower water in room 9.  
16  
17  
18

### 19 **Rapid evolution of antibiotic resistance associated with treatment**

20  
21  
22 *P. aeruginosa* is commonly associated with antibiotic resistance due to a number of  
23  
24 predisposing features including intrinsic resistance, a repertoire of efflux pumps and  
25  
26 antibiotic-inactivating enzymes including beta-lactamases. [41] Three infected  
27  
28 patients (2, 3 and 5) received antibiotic therapy, and in each case this was  
29  
30 associated with the development of resistance to at least one therapeutic agent.  
31  
32 Associated mutations were detected that were either partially or fully explanatory of  
33  
34 the phenotype (online supplementary appendix 12).  
35  
36  
37

38  
39 Patient 2 was treated with ciprofloxacin, nitrofurantoin and vancomycin (see online  
40  
41 supplementary appendix 11 for full details). 8/21 (38%) tested isolates from this  
42  
43 patient were ciprofloxacin resistant. 7/8 isolates (88%) of the ciprofloxacin-resistant  
44  
45 strains were distinguishable from the other isolates by a single SNP in *mexS*  
46  
47 (annotated as PA2491 in *P. aeruginosa* PAO1) (see online supplementary appendix  
48  
49 1 and 7). This SNP was predicted to result in a non-synonymous amino acid  
50  
51 substitution. Disruption of this gene has been shown to cause increased expression  
52  
53 of the *mexEF-oprN* multidrug efflux pump, associated with resistance to  
54  
55 quinolones.[42]  
56  
57  
58  
59  
60

1  
2  
3 Patient 3 was not treated with antibiotics, but isolates associated with this patient  
4  
5 demonstrated differences in resistance to timentin and piperacillin-tazobactam.  
6

7 These changes were associated with non-synonymous mutations in *gacA*, the  
8 response regulator of the GacA/GacS two-component system and in *lasR*, a  
9 transcriptional activator required for transcription of elastase and LasA protease  
10  
11 (online supplementary appendices 2 and 8).  
12  
13  
14  
15

16  
17 Patient 4 was treated with meropenem, piperacillin/tazobactam, flucloxacillin and  
18 colistin. Five isolates collected 10 to 18 days after initiation of meropenem showed  
19 resistance to imipenem and intermediate resistance to meropenem (see online  
20 supplementary appendix 3 and 9). The most likely mutation responsible for this  
21 phenotype was detectable in two isolates, both of which had a frame-shift mutation in  
22 the gene coding for the membrane porin *oprD*. [43]  
23  
24  
25  
26  
27  
28  
29

30  
31 Patient 5 had a prolonged stay in ITU and had multiple medical problems including  
32 *A. baumannii* infection and was treated with nine antibiotic agents including  
33 ciprofloxacin, meropenem and piperacillin-tazobactam. Serial isolates from this  
34 patient demonstrated the stepwise acquisition of two mutations (online  
35 supplementary appendix 4). The first was in *nalC*, a probable repressor of the  
36 TetR/AcrR family (online supplementary appendix 10). [44] On inspection of the  
37 sequence alignment in this region, a large deletion of 196 nucleotide bases was  
38 seen compared to the reference PAO1 strain. This mutation was seen in association  
39 with full resistance to piperacillin-tazobactam, ceftazidime, aztreonam, meropenem  
40 and intermediate resistance to ciprofloxacin. This deletion is likely to result in over-  
41 expression of efflux pumps involving the *mexAB-oprM* operon. [44,45] Ciprofloxacin  
42 resistance in a later isolate corresponded to the stepwise acquisition of a second  
43  
44  
45  
46  
47  
48  
49  
50  
51  
52  
53  
54  
55  
56  
57  
58  
59  
60

1  
2  
3 mutation. This mutation is predicted to affect the well-studied DNA gyrase subunit A  
4 gene (*gyrA*) which is strongly associated with ciprofloxacin resistance.[46]  
5  
6  
7

### 8 **Confirmation of *P. aeruginosa* genotypes in biofilms by whole-genome** 9 **metagenomic shotgun sequencing** 10

11  
12  
13 *P. aeruginosa* is able to produce and survive in biofilms. Plumbing parts such as flow  
14 straighteners, shower rosettes, flexible hoses, solenoid valves and thermostatic  
15 mixer valves (TMV) are particularly at risk of biofilm formation due to factors  
16 including surface areas, convoluted designs and inadequate pasteurisation. [47] To  
17 confirm the presence of *P. aeruginosa* in water fittings associated with rooms on the  
18 burns unit, we obtained a TMV removed by the hospital estates team from the  
19 shower in room nine as part of compliance with UK guidelines for managing *P.*  
20 *aeruginosa* in hospitals. On visual inspection, a biofilm was present which was  
21 scraped from the surface with a sterile scalpel. DNA from this biofilm was extracted  
22 for whole-genome shotgun sequencing. The majority of reads did not map to any  
23 known bacterial taxa. The most abundant taxon identified was *Pseudomonas*  
24 *aeruginosa* (3%). Subsequent alignment to the *P. aeruginosa* PAO1 reference  
25 covered 94% of the 6.3 million base reference genome at a median coverage of 5x,  
26 confirming that reads were correctly classified to this species and not other  
27 environmental *Pseudomonas* species. Alignment to the *P. aeruginosa* Clade E  
28 reference genome followed by phylogenetic placement of reads demonstrated that it  
29 fell into the same clade as previously recovered isolates from the shower or tap in  
30 room 9 (indicated on figure 3, and in online supplementary appendix 6).  
31  
32  
33  
34  
35  
36  
37  
38  
39  
40  
41  
42  
43  
44  
45  
46  
47  
48  
49  
50  
51  
52

### 53 **DISCUSSION** 54 55 56 57 58 59 60

1  
2  
3 The hospital environment has been intimately linked with *P. aeruginosa* infection for  
4  
5 over 50 years yet hospital acquisitions, clusters and outbreaks remain a common  
6  
7 occurrence and understanding precise routes of transmission can be difficult. [47,48]  
8

9  
10 Our results demonstrate that, even in a new hospital, *P. aeruginosa* can become  
11  
12 rapidly endemic in hospital plumbing. Furthermore, by linking *P. aeruginosa*  
13  
14 genotypes recovered from patients to specific individual water outlets, we offer  
15  
16 compelling evidence of unidirectional transmission from water to patients. Further, by  
17  
18 sequencing of a biofilm identified in a TMV from a hospital water system, we can  
19  
20 identify the likely common source of genotypes found in water and in the hospital  
21  
22 environment.  
23

24  
25  
26 Our results suggest that use of whole-genome sequencing can reduce ambiguity  
27  
28 about potential transmission events in hospitals and consequently inform infection  
29  
30 prevention efforts about the direction and sequence of transmission. Typing  
31  
32 schemes such as MLST and PFGE are much lower resolution methods and would  
33  
34 not be able to provide sufficient information to permit such inferences to be made. It  
35  
36 is notable that the burns unit was colonised by a single clone, meaning that it was  
37  
38 very unlikely that water outlets at each bed space were colonised as a result of  
39  
40 transmissions from the patient or environment. For this to happen would require  
41  
42 multiple transmission events from separate patients with the same clone, for which  
43  
44 there is not evidence. Instead we speculate that this clone was introduced to the  
45  
46 hospital associated with its commissioning. One hypothesis is that particular  
47  
48 plumbing fittings, i.e. the TMV may have been colonised simultaneously by a clone  
49  
50 circulating in water. Clade E (ST395) has been frequently reported associated with  
51  
52 water, so this remains a possibility. [49,50] However, it is possible that plumbing  
53  
54 fittings are installed 'pre-seeded' with *P. aeruginosa* as has already been proposed  
55  
56  
57  
58  
59  
60



1  
2  
3 by Kelsey.[3,5,47] Investigation of an outbreak in Wales implicated new plumbing  
4 parts as a potential source of *P. aeruginosa*. New plumbing components are often  
5 tested by companies prior to their supply and it is possible they were contaminated  
6 prior to distribution. The limited amount of diversity (average 4 SNPs) seen within  
7 this clade is consistent with a single founding genotype coinciding with the opening  
8 of the burns unit, based on estimates from a previous study using WGS which  
9 reported that mutations accumulate at a rate of approximately one every 3-4 months  
10 in a hospital-associated clone.[51] However our results suggest that our isolates  
11 accumulate mutations even more slowly. This may be due to reduced growth rates in  
12 nutritionally-poor biofilms.[52]  
13  
14  
15  
16  
17  
18  
19  
20  
21  
22  
23  
24  
25

26 It is notable that antibiotic resistance to multiple first-line agents developed rapidly in  
27 response to therapy. These results underline the importance of selecting appropriate  
28 antibiotic therapy in *P. aeruginosa* infections. It is reassuring however that antibiotic  
29 resistance genotypes selected *in vivo* did not show evidence of persistence in the  
30 ward environment or transmission to other patients.  
31  
32  
33  
34  
35  
36  
37

38 Our study has certain limitations. Based on a previous audit, we expected around  
39 one-third of patients screened for *P. aeruginosa* would develop colonisation or  
40 clinical infection. In fact, only 5 out of 30 of patients were colonised. This may have  
41 been related to guidance and engineering interventions being put in place during the  
42 study as detailed in national guidance issued whilst this study was on-going. In  
43 addition, infection control policies were revised to address control of an outbreak of a  
44 multi-drug resistant *A. baumannii* in this same burns unit. Following these  
45 interventions, only 1 of the last 20 patients recruited was infected with *P. aeruginosa*  
46  
47  
48  
49  
50  
51  
52  
53  
54  
55  
56  
57  
58  
59  
60

1  
2  
3 which may demonstrate the importance of national guidance in reducing  
4  
5 transmissions.  
6  
7

8  
9 By focusing on burns patients who receive hydrotherapy, our study population were  
10  
11 at extremely high risk of waterborne infection. In other patient groups it may be that  
12  
13 alternative routes of transmission including cross-infection or endogenous carriage  
14  
15 play a more important role. Our results suggest that our burns unit is endemically  
16  
17 colonised with a distinct clone of *P. aeruginosa* that may have been imported  
18  
19 coinciding with the opening of the hospital. Other intensive care units, particularly  
20  
21 those which have been open for longer may have harbour a greater diversity of *P.*  
22  
23 *aeruginosa* as a result of increased opportunities for clones to be imported.  
24  
25

26  
27 One potential application for WGS in infection control would be to determine whether  
28  
29 cases are as a result of water transmission, or represent sporadic clones originating  
30  
31 from the wider environment. Despite improved guidance concerning improved  
32  
33 engineering infection control practices and the introduction of the water safety group  
34  
35 in the UK, it may not be realistic to eliminate *P. aeruginosa* from hospitals entirely. In  
36  
37 augmented care units such as ITUs, burns units and neonatal wards where *P.*  
38  
39 *aeruginosa* poses a significant risk to vulnerable patients, the increased resolution  
40  
41 offered by WGS will justify its use, particularly as the costs continue to fall.  
42  
43  
44

45  
46 In conclusion, we have identified through WGS clear evidence for transmission of *P.*  
47  
48 *aeruginosa* from specific water outlets to burns patients and offer a forensic-level  
49  
50 framework for dealing with outbreaks linked to hospital water. We expect WGS will  
51  
52 continue to make inroads into clinical microbiology and become a vital tool for  
53  
54 tracking *P. aeruginosa* in the hospital environment, helping inform targeted control  
55  
56 measures to help protect patients at risk of infection.  
57  
58  
59  
60

## Acknowledgments

We are grateful to Mark Webber for discussions on antibiotic resistance and to Paul Keim for discussion on phylogenetic placement of metagenomics samples. We thank Lex Nederbragt, Ave Tooming-Klunderud and the staff of the Norwegian Sequencing Centre, Oslo for Pacific Biosciences sequencing. We thank Matthew Smith-Banks for laboratory assistance with processing samples. We thank Jimmy Walker for critical reading of the manuscript. We thank Drs David Baltrus, Thomas Connor, Jennifer Gardy and Alan McNally for their helpful comments and suggestions to help improve the manuscript made during the open peer review process.

## Contributors

MP NM BO conceived the study. CW and AB enrolled patients into study and collected samples. NC collected environmental and water samples. NC CC MN processed samples and performed microbiology. NC CC JQ did sequencing. JQ NC CT NL analysed the data. NL NC JQ MP BO wrote the paper. All authors commented on the manuscript draft.

## Funding

This paper presents independent research funded by the National Institute for Health research (NIHR). The views expressed are those of the author(s) and not necessarily those of the NHS, the NIHR or the Department of Health.

## Competing interests

None

## Data Sharing Statement

1  
2  
3 Pacific Biosciences raw data files are available from the corresponding author  
4  
5 (Nicholas J Loman, n.j.loman@bham.ac.uk) and will be made available via Data  
6  
7 Dryad.  
8  
9

### 10 **Ethics approval**

11  
12 The study protocol received approval from National Research Ethics Service  
13  
14 committee in the West Midlands (reference number 12/WM/0181).  
15  
16  
17  
18  
19  
20  
21  
22  
23  
24  
25  
26  
27  
28  
29  
30  
31  
32  
33  
34  
35  
36  
37  
38  
39  
40  
41  
42  
43  
44  
45  
46  
47  
48  
49  
50  
51  
52  
53  
54  
55  
56  
57  
58  
59  
60

## Figure and Table Legends

### Figure 1 Legend

An overview of all samples collected during the study in global phylogenetic context with other sequenced strains of *P. aeruginosa* from the set of Stewart *et al.*[28]

Samples collected in this study are widely dispersed in the tree, which contains isolates from different environments (Panel A). Bar plots indicate the numbers of each type of sample collected (Panel B). Microdiversity within each clade is shown, with the colour bar indicating the source of each sample (Panel C).

### Figure 2 Legend

A schematic view of the 300-day study of *P. aeruginosa* in a burns centre and critical care unit. Time in days is shown along the X-axis with bed numbers in the critical care unit and burns unit along the Y-axis. Each circular icon indicates a positive isolate of *P. aeruginosa*. The icon's logotype indicates which environment it originated from (wound, urine/sputum, environment or water). The filled colour of the icon indicates the clade it belongs to. Patient icons represent the enrolment of a screening patient into the study and their location. Patient movements around the hospital are noted by dotted lines. The five patients infected with *P. aeruginosa* are denoted by rounded boxes. Boxes are coloured according to the patient number. In the event two or more isolates of the same source and clade were collected on the same day, these have been collapsed into a single circular icon.

### Figure 3 Legend

1  
2  
3 The high-resolution phylogenetic reconstruction of Clade E isolates. This  
4  
5 demonstrates the clustering of genotypes by bed space. Patient associated samples  
6  
7 are contained within the room 11 clade. This clade contains water samples from the  
8  
9 shower and environmental samples from the shower, drain and trolley. The water  
10  
11 samples from the room 11 tap are in a distinct clade, indicating the biofilm within the  
12  
13 tap has a distinct genotype to the shower. This suggests environmental  
14  
15 contamination was more likely to arise from contaminated shower water than tap  
16  
17 water. Details of sampling site, days since start of study and presence of pBURNS  
18  
19 plasmids are also shown. The likely phylogenetic position of *P. aeruginosa* detected  
20  
21 in a biofilm from a thermostatic mixer valve is shown in the clade associated with  
22  
23 room 9 and indicated 'TMV'.  
24  
25  
26  
27

### 28 **Appendix 1**

29  
30  
31 Phylogenetic tree, sample origin and antibiotic-resistance phenotype for Clade C  
32  
33 isolates. The patient column refers to the sampling event. If a sample was collected  
34  
35 from a patient colonised with *P. aeruginosa* or that patient's environment the patient  
36  
37 number if marked. Patient numbers starting with SP relate to screening patients who  
38  
39 were not colonised by *P. aeruginosa*.  
40  
41  
42

### 43 **Appendix 2**

44  
45 Phylogenetic tree, sample origin and antibiotic-resistance phenotype for Clade D  
46  
47 isolates.  
48  
49

### 50 **Appendix 3**

51  
52  
53 Phylogenetic tree, sample origin and antibiotic-resistance phenotype for Clade E  
54  
55 isolates.  
56  
57

### 58 **Appendix 4**

1  
2  
3 Phylogenetic tree, sample origin and antibiotic-resistance phenotype for Clade G  
4 isolates.  
5  
6

#### 7 8 **Appendix 5** 9

10 A physical map of the burns unit, indicating individual patient bed areas, shower  
11 areas. The water supply is indicated by a blue line.  
12  
13

#### 14 15 **Appendix 6** 16

17 Clade E isolates in phylogenetic context with the metagenomics sample from a tap  
18 mixer valve.  
19  
20

#### 21 22 **Appendix 7** 23

24 Single nucleotide and small indel variants detected within Clade C isolates.  
25  
26

#### 27 28 **Appendix 8** 29

30 Single nucleotide and small indel variants detected within Clade D isolates.  
31  
32

#### 33 34 **Appendix 9** 35

36 Single nucleotide and small indel variants detected within Clade E isolates.  
37  
38

#### 39 40 **Appendix 10** 41

42 Single nucleotide and small indel variants detected within Clade G isolates.  
43  
44

#### 45 46 **Appendix 11** 47

48 The type of antibiotics administered to the five patients in this study.  
49

#### 50 51 **Appendix 12** 52

53 Mutations predicted to be associated with antibiotic-resistance.  
54  
55  
56  
57  
58  
59  
60

## REFERENCES

- 1 Reuter S, Sigge A, Wiedeck H, *et al.* Analysis of transmission pathways of *Pseudomonas aeruginosa* between patients and tap water outlets. *Crit Care Med* 2002;**30**:2222–8. doi:10.1097/01.CCM.0000025907.12833.10
- 2 Struelens MJ, Rost F, Deplano A, *et al.* *Pseudomonas aeruginosa* and Enterobacteriaceae bacteremia after biliary endoscopy: an outbreak investigation using DNA macrorestriction analysis. *Am J Med* 1993;**95**:489–98.
- 3 DiazGranados CA, Jones MY, Kongphet-Tran T, *et al.* Outbreak of *Pseudomonas aeruginosa* infection associated with contamination of a flexible bronchoscope. *Infect Control Hosp Epidemiol* 2009;**30**:550–5. doi:10.1086/597235
- 4 Crivaro V, Di Popolo A, Caprio A, *et al.* *Pseudomonas aeruginosa* in a neonatal intensive care unit: molecular epidemiology and infection control measures. *BMC Infect Dis* 2009;**9**:70. doi:10.1186/1471-2334-9-70
- 5 Moolenaar RL, Crutcher JM, San Joaquin VH, *et al.* A prolonged outbreak of *Pseudomonas aeruginosa* in a neonatal intensive care unit: did staff fingernails play a role in disease transmission? *Infect Control Hosp Epidemiol* 2000;**21**:80–5. doi:10.1086/501739
- 6 Trautmann M, Lepper PM, Haller M. Ecology of *Pseudomonas aeruginosa* in the intensive care unit and the evolving role of water outlets as a reservoir of the organism. *Am J Infect Control* 2005;**33**:S41–9. doi:10.1016/j.ajic.2005.03.006
- 7 Foca M, Jakob K, Whittier S, *et al.* Endemic *Pseudomonas aeruginosa* infection in a neonatal intensive care unit. *N Engl J Med* 2000;**343**:695–700. doi:10.1056/NEJM200009073431004
- 8 Kolmos HJ, Thuesen B, Nielsen SV, *et al.* Outbreak of infection in a burns unit due to *Pseudomonas aeruginosa* originating from contaminated tubing used for irrigation of patients. *J Hosp Infect* 1993;**24**:11–21.
- 9 Widmer AF, Wenzel RP, Trilla A, *et al.* Outbreak of *Pseudomonas aeruginosa* infections in a surgical intensive care unit: probable transmission via hands of a health care worker. *Clin Infect Dis* 1993;**16**:372–6.
- 10 Srinivasan A, Wolfenden LL, Song X, *et al.* An outbreak of *Pseudomonas aeruginosa* infections associated with flexible bronchoscopes. *N Engl J Med* 2003;**348**:221–7. doi:10.1056/NEJMoa021808
- 11 Wise J. Three babies die in pseudomonas outbreak at Belfast neonatal unit. *BMJ*. 2012;**344**:e592.



- 1  
2  
3 12 Breathnach AS, Cubbon MD, Karunaharan RN, *et al.* Multidrug-resistant  
4 Pseudomonas aeruginosa outbreaks in two hospitals: association with  
5 contaminated hospital waste-water systems. *J Hosp Infect* 2012;**82**:19–  
6 24. doi:10.1016/j.jhin.2012.06.007  
7
- 8  
9 13 Walker JT, Jhutti A, Parks S, *et al.* Investigation of healthcare-acquired  
10 infections associated with Pseudomonas aeruginosa biofilms in taps in  
11 neonatal units in Northern Ireland. *J Hosp Infect* 2014;**86**:16–23.  
12 doi:10.1016/j.jhin.2013.10.003  
13
- 14 14 *Health Technical Memorandum 04-01: Addendum.* Department of Health  
15 [https://www.gov.uk/government/uploads/system/uploads/attachment\\_data/](https://www.gov.uk/government/uploads/system/uploads/attachment_data/file/140105/Health_Technical_Memorandum_04-01_Addendum.pdf)  
16 [file/140105/Health\\_Technical\\_Memorandum\\_04-01\\_Addendum.pdf](https://www.gov.uk/government/uploads/system/uploads/attachment_data/file/140105/Health_Technical_Memorandum_04-01_Addendum.pdf)  
17 (accessed 11 Dec2013).  
18
- 19 15 Maiden MC, Bygraves JA, Feil E, *et al.* Multilocus sequence typing: a  
20 portable approach to the identification of clones within populations of  
21 pathogenic microorganisms. *Proc Natl Acad Sci USA* 1998;**95**:3140–5.  
22
- 23 16 Jefferies JMC, Cooper T, Yam T, *et al.* Pseudomonas aeruginosa  
24 outbreaks in the neonatal intensive care unit—a systematic review of risk  
25 factors and environmental sources. *J Med Microbiol* 2012;**61**:1052–61.  
26 doi:10.1099/jmm.0.044818-0  
27
- 28 17 Cholley P, Thouverez M, Hocquet D, *et al.* Most multidrug-resistant  
29 Pseudomonas aeruginosa isolates from hospitals in eastern France  
30 belong to a few clonal types. *J Clin Microbiol* 2011;**49**:2578–83.  
31 doi:10.1128/JCM.00102-11  
32
- 33 18 Curran B, Jonas D, Grundmann H, *et al.* Development of a multilocus  
34 sequence typing scheme for the opportunistic pathogen Pseudomonas  
35 aeruginosa. *J Clin Microbiol* 2004;**42**:5644–9.  
36 doi:10.1128/JCM.42.12.5644-5649.2004  
37
- 38 19 Harris SR, Cartwright EJP, Török ME, *et al.* Whole-genome sequencing  
39 for analysis of an outbreak of methicillin-resistant Staphylococcus aureus:  
40 a descriptive study. *Lancet Infect Dis* 2013;**13**:130–6. doi:10.1016/S1473-  
41 3099(12)70268-2  
42
- 43 20 Lewis T, Loman NJ, Bingle L, *et al.* High-throughput whole-genome  
44 sequencing to dissect the epidemiology of Acinetobacter baumannii  
45 isolates from a hospital outbreak. *J Hosp Infect* 2010;**75**:37–41.  
46 doi:10.1016/j.jhin.2010.01.012  
47
- 48 21 Snitkin ES, Zelazny AM, Thomas PJ, *et al.* Tracking a hospital outbreak  
49 of carbapenem-resistant Klebsiella pneumoniae with whole-genome  
50 sequencing. *Sci Transl Med* 2012;**4**:148ra116.  
51 doi:10.1126/scitranslmed.3004129  
52
- 53 22 Loman NJ, Misra RV, Dallman TJ, *et al.* Performance comparison of  
54 benchtop high-throughput sequencing platforms. *Nat Biotechnol*  
55  
56  
57  
58  
59  
60

- 2012;**30**:434–9. doi:10.1038/nbt.2198
- 23 Tredget EE, Shankowsky HA, Joffe AM, *et al.* Epidemiology of infections with *Pseudomonas aeruginosa* in burn patients: the role of hydrotherapy. *Clin Infect Dis* 1992;**15**:941–9.
- 24 Langschmidt J, Caine PL, Wearn CM, *et al.* Hydrotherapy in burn care: A survey of hydrotherapy practices in the UK and Ireland and literature review. *Burns* Published Online First: 10 December 2013. doi:10.1016/j.burns.2013.11.006
- 25 Tredget EE, Shankowsky HA, Rennie R, *et al.* *Pseudomonas* infections in the thermally injured patient. *Burns* 2004;**30**:3–26.
- 26 Davison PG, Loiselle FB, Nickerson D. Survey on current hydrotherapy use among North American burn centers. *J Burn Care Res* 2010;**31**:393–9. doi:10.1097/BCR.0b013e3181db5215
- 27 Bolger AM, Lohse M, Usadel B. Trimmomatic: a flexible trimmer for Illumina sequence data. *Bioinformatics* Published Online First: 28 April 2014. doi:10.1093/bioinformatics/btu170
- 28 Stewart L, Ford A, Sangal V, *et al.* Draft genomes of 12 host-adapted and environmental isolates of *Pseudomonas aeruginosa* and their positions in the core genome phylogeny. *Pathog Dis* Published Online First: 26 October 2013. doi:10.1111/2049-632X.12107
- 29 Li H, Durbin R. Fast and accurate long-read alignment with Burrows-Wheeler transform. *Bioinformatics* 2010;**26**:589–95. doi:10.1093/bioinformatics/btp698
- 30 Koboldt DC, Zhang Q, Larson DE, *et al.* VarScan 2: somatic mutation and copy number alteration discovery in cancer by exome sequencing. *Genome Res* 2012;**22**:568–76. doi:10.1101/gr.129684.111
- 31 Price MN, Dehal PS, Arkin AP. FastTree 2--approximately maximum-likelihood trees for large alignments. *PLoS One* 2010;**5**:e9490. doi:10.1371/journal.pone.0009490
- 32 Zerbino DR, Birney E. Velvet: algorithms for de novo short read assembly using de Bruijn graphs. *Genome Res* 2008;**18**:821–9. doi:10.1101/gr.074492.107
- 33 Jolley KA, Maiden MC. BIGSdb: Scalable analysis of bacterial genome variation at the population level. *BMC Bioinformatics* 2010;**11**:595–5. doi:10.1186/1471-2105-11-595
- 34 Wood DE, Salzberg SL. Kraken: ultrafast metagenomic sequence classification using exact alignments. *Genome Biol* 2014;**15**:R46. doi:10.1186/gb-2014-15-3-r46
- 35 Matsen FA, Kodner RB, Armbrust EV. pplacer: linear time maximum-

- 1  
2  
3 likelihood and Bayesian phylogenetic placement of sequences onto a  
4 fixed reference tree. *BMC Bioinformatics* 2010;**11**:538. doi:10.1186/1471-  
5 2105-11-538  
6
- 7 36 Scott FW, Pitt TL. Identification and characterization of transmissible  
8 *Pseudomonas aeruginosa* strains in cystic fibrosis patients in England  
9 and Wales. *J Med Microbiol* 2004;**53**:609–15.
- 10  
11 37 Panagea S, Winstanley C, Parsons YN, *et al.* PCR-based detection of a  
12 cystic fibrosis epidemic strain of *Pseudomonas Aeruginosa*. *Mol Diagn*  
13 2003;**7**:195–200.
- 14  
15 38 Gardy JL, Johnston JC, Ho Sui SJ, *et al.* Whole-genome sequencing and  
16 social-network analysis of a tuberculosis outbreak. *N Engl J Med*  
17 2011;**364**:730–9. doi:10.1056/NEJMoa1003176
- 18  
19 39 Bryant JM, Grogono DM, Greaves D, *et al.* Whole-genome sequencing to  
20 identify transmission of *Mycobacterium abscessus* between patients with  
21 cystic fibrosis: a retrospective cohort study. *Lancet* 2013;**381**:1551–60.  
22 doi:10.1016/S0140-6736(13)60632-7
- 23  
24 40 Lienau EK, Strain E, Wang C, *et al.* Identification of a salmonellosis  
25 outbreak by means of molecular sequencing. *N Engl J Med*  
26 2011;**364**:981–2. doi:10.1056/NEJMc1100443
- 27  
28 41 Lambert PA. Mechanisms of antibiotic resistance in *Pseudomonas*  
29 *aeruginosa*. *J R Soc Med* 2002;**95 Suppl 41**:22–6.
- 30  
31 42 Sobel ML, Neshat S, Poole K. Mutations in PA2491 (*mexS*) promote  
32 *MexT*-dependent *mexEF-oprN* expression and multidrug resistance in a  
33 clinical strain of *Pseudomonas aeruginosa*. *J Bacteriol* 2005;**187**:1246–  
34 53. doi:10.1128/JB.187.4.1246-1253.2005
- 35  
36 43 Quinn JP, Dudek EJ, DiVincenzo CA, *et al.* Emergence of resistance to  
37 imipenem during therapy for *Pseudomonas aeruginosa* infections. *J*  
38 *Infect Dis* 1986;**154**:289–94.
- 39  
40 44 Cao L, Srikumar R, Poole K. *MexAB-OprM* hyperexpression in *NalC*-type  
41 multidrug-resistant *Pseudomonas aeruginosa*: identification and  
42 characterization of the *nalC* gene encoding a repressor of PA3720-  
43 PA3719. *Mol Microbiol* 2004;**53**:1423–36. doi:10.1111/j.1365-  
44 2958.2004.04210.x
- 45  
46 45 Llanes C, Hocquet D, Vogne C, *et al.* Clinical strains of *Pseudomonas*  
47 *aeruginosa* overproducing *MexAB-OprM* and *MexXY* efflux pumps  
48 simultaneously. *Antimicrob Agents Chemother* 2004;**48**:1797–802.
- 49  
50 46 Cambau E, Perani E, Dib C, *et al.* Role of mutations in DNA gyrase  
51 genes in ciprofloxacin resistance of *Pseudomonas aeruginosa*  
52 susceptible or resistant to imipenem. *Antimicrob Agents Chemother*  
53 1995;**39**:2248–52.
- 54  
55  
56  
57  
58  
59  
60

- 1  
2  
3 47 Kelsey M. Pseudomonas in augmented care: should we worry? *J*  
4 *Antimicrob Chemother* 2013;**68**:2697–700. doi:10.1093/jac/dkt288  
5  
6 48 Rogers DE. The changing pattern of life-threatening microbial disease. *N*  
7 *Engl J Med* 1959;**261**:677–83. doi:10.1056/NEJM195910012611401  
8  
9 49 Martin K, Baddal B, Mustafa N, *et al*. Clusters of genetically similar  
10 isolates of *Pseudomonas aeruginosa* from multiple hospitals in the UK. *J*  
11 *Med Microbiol* 2013;**62**:988–1000. doi:10.1099/jmm.0.054841-0  
12  
13 50 Slekovec C, Plantin J, Cholley P, *et al*. Tracking down antibiotic-resistant  
14 *Pseudomonas aeruginosa* isolates in a wastewater network. *PLoS One*  
15 2012;**7**:e49300. doi:10.1371/journal.pone.0049300  
16  
17 51 Snyder LA, Loman N, Faraj LA, *et al*. Epidemiological investigation of  
18 *Pseudomonas aeruginosa* isolates from a six-year-long hospital outbreak  
19 using high-throughput whole genome sequencing. *Euro Surveill* 2013;**18**.  
20  
21 52 Donlan RM. Biofilm formation: a clinically relevant microbiological  
22 process. *Clin Infect Dis* 2001;**33**:1387–92. doi:10.1086/322972  
23  
24  
25  
26  
27  
28  
29  
30  
31  
32  
33  
34  
35  
36  
37  
38  
39  
40  
41  
42  
43  
44  
45  
46  
47  
48  
49  
50  
51  
52  
53  
54  
55  
56  
57  
58  
59  
60

**Title**

Seeking the source of *Pseudomonas aeruginosa* infections in a recently opened hospital: an observational study using whole-genome sequencing

**Authors**

Joshua Quick <sup>1,2\*</sup>, Nicola Cumley <sup>2\*</sup>, Christopher M. Wearn <sup>2,3</sup>, Marc Niebel <sup>2</sup>,  
Chrystala Constantinidou <sup>4</sup>, [Chris M Thomas](#) <sup>1</sup>, Mark J. Pallen <sup>4</sup>, Naiem S. Moiemem <sup>2,3</sup>, Amy Bamford <sup>2,3</sup>, Beryl Oppenheim <sup>2#</sup>, Nicholas J. Loman <sup>1#</sup>

**Affiliations**

<sup>1</sup>Institute of Microbiology and Infection, University of Birmingham, Birmingham, United Kingdom

<sup>2</sup>NIHR Surgical Reconstruction and Microbiology Research Centre, Queen Elizabeth Hospital, Birmingham, United Kingdom

<sup>3</sup>Healing Foundation Centre for Burns Research, University Hospital Birmingham Foundation Trust, Birmingham, United Kingdom

<sup>4</sup>Division of Microbiology and Immunology, University of Warwick, Warwick, United Kingdom

\*Contributed equally

**Correspondence:**

Dr Nicholas James Loman

Institute of Microbiology and Infection, University of Birmingham, Birmingham, B15 2TT United Kingdom

1  
2  
3 Telephone: +44 (0) 121 414 8849  
4  
5

6 Email: [n.j.loman@bham.ac.uk](mailto:n.j.loman@bham.ac.uk)  
7  
8

9 Dr Beryl Oppenheim  
10

11  
12 Clinical Microbiology, University Hospitals Birmingham NHS Foundation Trust  
13

14 Queen Elizabeth Hospital Birmingham, Mindelsohn Way, Edgbaston  
15

16 Birmingham, B15 2WB  
17

18  
19  
20 Telephone: +44 (0) 121 371 6523  
21

22 Email: [Beryl.Oppenheim@uhb.nhs.uk](mailto:Beryl.Oppenheim@uhb.nhs.uk)  
23  
24

25 **Keywords**  
26

27  
28 High-Throughput DNA sequencing; Pseudomonas aeruginosa; Burns, Hydrotherapy  
29  
30

31 **Word Count**  
32

33 4539  
34  
35  
36  
37  
38  
39  
40  
41  
42  
43  
44  
45  
46  
47  
48  
49  
50  
51  
52  
53  
54  
55  
56  
57  
58  
59  
60

## ABSTRACT

### Objectives

*Pseudomonas aeruginosa* is a common nosocomial pathogen responsible for significant morbidity and mortality internationally. Patients may become colonised or infected with *P. aeruginosa* after exposure to contaminated sources within the hospital environment. The aim of this study was to determine whether whole-genome sequencing (WGS) can be used to determine the source in a cohort of burns patients at high risk of *P. aeruginosa* acquisition.

### Study design

An observational prospective cohort study.

### Setting

Burns care ward and critical care ward in the United Kingdom.

### Participants

Patients with >7% total burns by surface area were recruited into the study.

### Methods

All patients were screened for *P. aeruginosa* on admission and samples taken from their immediate environment, including water. Screening patients who subsequently developed a positive *P. aeruginosa* microbiology result were subject to enhanced environmental surveillance. All isolates of *P. aeruginosa* were whole-genome sequenced. Sequence analysis looked at similarity and relatedness between isolates.

### Results

1  
2  
3 Whole-genome sequences for 141 *P. aeruginosa* isolates were obtained from  
4 patients, hospital water and the ward environment. Phylogenetic analysis revealed  
5 eight distinct clades, with a single clade representing the majority of environmental  
6 isolates in the burns unit. Isolates from three patients had identical genotypes  
7 compared with water isolates from the same room. There was clear clustering of  
8 water isolates by room and outlet, allowing the source of acquisitions to be  
9 unambiguously identified. Whole-genome shotgun sequencing of biofilm DNA  
10 extracted from a thermostatic mixer valve revealed this was the source of a *P.*  
11 *aeruginosa* subpopulation previously detected in water. In the remaining two cases  
12 there was no clear link to the hospital environment.  
13  
14  
15  
16  
17  
18  
19  
20  
21  
22  
23  
24

## 25 **Conclusions**

26  
27  
28 This study reveals that WGS can be used for source tracking of *P. aeruginosa* in a  
29 hospital setting, and that acquisitions can be traced to a specific source within a  
30 hospital ward.  
31  
32  
33  
34  
35  
36  
37  
38  
39  
40  
41  
42  
43  
44  
45  
46  
47  
48  
49  
50  
51  
52  
53  
54  
55  
56  
57  
58  
59  
60



## ARTICLE SUMMARY

### Strengths and limitations of the study

- We have demonstrated that whole-genome sequencing can be used for source tracking of *P. aeruginosa* in a hospital setting.
- We show convincing evidence that transmission has occurred directly from water to patients, but other routes are as likely.
- The main limitation of the study was the sample size, which could be attributable to interventions being carried out during the study.
- Our study focused on a burns unit and critical care unit in a newly built hospital. Modes of *P. aeruginosa* transmission may be different in hospitals with different styles of plumbing and on other augmented care units.

## INTRODUCTION

*Pseudomonas aeruginosa* is a ubiquitous Gram-negative bacterium and an important opportunistic pathogen in the healthcare setting. *P. aeruginosa* particularly affects those with impaired host or mucosal immunity and has a broad range of presentations including respiratory infections in cystic fibrosis and mechanically ventilated patients, bloodstream infections in premature neonates and wounds in burns injuries. Nosocomial *P. aeruginosa* outbreaks are frequently reported and associated with water sources such as taps, showers, mixer valves and flow straighteners, sink traps and drains.[1-10] Other potential routes of transmission include cross-infection, for example carriage on the hands of health care workers, and through contaminated medical equipment such as endoscopic devices.[3,5]

In the UK, the role of water in the transmission of *P. aeruginosa* in healthcare settings has become a matter of urgent concern in response to a recent high-profile outbreak affecting a neonatal critical care unit in Belfast in 2012.[11] This source was eventually determined to be sink taps.[11-13] National guidance is now in place detailing enhanced procedures for routine water sampling on augmented care units, with directed interventions such as disinfection and replacement of high-risk plumbing parts required.[14]

Historical phenotypic typing methods for *P. aeruginosa* such as O-antigen serotyping have more recently been replaced by molecular typing methods such as pulsed-field gel electrophoresis (PFGE), variable number tandem repeat analysis (VNTR) and random amplification of polymorphic DNA (RAPD) and multi-locus sequencing typing (MLST).[15] These methods have been used to investigate outbreaks of *P. aeruginosa* within hospitals.[4,16-18] However, such techniques have important

1  
2  
3 limitations for source tracking of infections in hospitals as they sample limited  
4  
5 numbers of sites in the genome which may result in false clustering of unrelated  
6  
7 strains.[19] In the past five years, whole-genome sequencing (WGS) has started to  
8  
9 be used to investigate outbreaks in hospitals. WGS is attractive because of its digital,  
10  
11 sharable format and ultra-high resolution, which is able to discriminate two isolates  
12  
13 differing by just a single mutation. WGS has been successfully used to determine  
14  
15 likely transmission chains during outbreaks of *Staphylococcus aureus*, *Acinetobacter*  
16  
17 *baumannii* and *Klebsiella pneumoniae*. [19-21] Benchtop sequencing instruments  
18  
19 now offer a cost-effective approach for bringing bacterial WGS to the clinical  
20  
21 environment. [1,22]  
22  
23  
24

25  
26 In this study, we explore the utility of WGS to determine the likely sources of *P.*  
27  
28 *aeruginosa* in an at-risk population of burns patients. In the UK and US burns  
29  
30 patients receive shower cart hydrotherapy as a mainstay of burns treatment. [23-26]  
31  
32 A previous hospital audit suggested that up to one-third of such patients became  
33  
34 colonised with *P. aeruginosa*. We hypothesised that this high rate of acquisition may  
35  
36 relate to transmission from hospital shower water during therapy. We therefore  
37  
38 wished to understand the importance of transmission from water compared with  
39  
40 alternative routes such as cross-infection and endogenous carriage.  
41  
42  
43  
44  
45  
46  
47  
48  
49  
50  
51  
52  
53  
54  
55  
56  
57  
58  
59  
60

## MATERIALS AND METHODS

### Hospital setting

An observational, prospective study design was employed in a burns centre serving approximately 13.7 million people across the Midlands region of England with 300 admissions annually. Opened in June 2010, the burns centre comprises a purpose built 15-bed ward with 11 side-rooms and 2 dual-bedded rooms. Patients requiring mechanical ventilation and organ support are usually treated in two self-contained burns cubicles located within the trauma critical care unit (CCU). Despite the observational nature of the study, sampling was carried out during implementation of interim national guidance on control of *P. aeruginosa* issued by the Department of Health. These guidelines were issued in draft form March 2012, and subsequently revised in March 2013. This meant that parallel water sampling and engineering interventions were being undertaken during the period of study. In addition, some enhanced infection prevention measures were also introduced in response to an outbreak of a multi-drug resistant *A. baumannii*.

### Study design and patient selection

Ethical approval was sought and received from the National Research Ethics Service committee in the West Midlands (reference number 12/WM/0181). Patients admitted to the burns unit were eligible for the screening phase of the study if they had burns injuries covering greater than 7% total body surface area (TBSA). Patients were screened as soon as possible after admission after they had given written informed consent. When appropriate, legal consultee advice was sought for patients lacking capacity due to emergency treatment. On admission, recruited patients were screened for carriage of *P. aeruginosa* (wounds, urine and stool) using standard

1  
2  
3 microbiology techniques. Samples were then taken as part of routine microbiology  
4 service during the patients stay. Environmental and water samples were taken after  
5 the patient was admitted to the burns centre. If during the period of stay *P.*  
6  
7  
8  
9  
10 *aeruginosa* was isolated from a patient sample the patient was recruited into the  
11 second phase of the study. In this phase, patients had wound swabs taken at each  
12 dressing change as well as twice-weekly urine samples. The patient's environment  
13 and water from outlets in their bed space were sampled weekly for the duration of  
14 their stay, and after discharge (post-cleaning). Termination of the study was planned  
15 after 30 screening patient admissions, or a year, whichever came soonest, after  
16 which 10 patients were expected to acquire *P. aeruginosa*. This prediction was  
17 based on a previous local audit which suggested about one-thirds of burns patients  
18 became colonised with *P. aeruginosa*..  
19  
20  
21  
22  
23  
24  
25  
26  
27  
28  
29

### 30 **Microbiological and molecular methods**

31  
32  
33 *P. aeruginosa* isolates were obtained from wound swab, urine, stool, environmental  
34 and water samples. *P. aeruginosa* was isolated from wound swabs, urine and stool  
35 by inoculation onto cysteine lactose electrolyte deficient agar (CLED) and cetrimide  
36 agar and incubation for 24 hours at 37°C. Stool samples were cultured overnight in a  
37 cetrimide enrichment broth before subculture onto CLED. Identification was  
38 confirmed by resistance to C-390 and the VITEK® 2 GN identification card. Antibiotic  
39 sensitivity assays were performed using the VITEK® 2 AST N-210 card (bioMérieux,  
40 Basingstoke, UK).  
41  
42  
43  
44  
45  
46  
47  
48  
49  
50

51  
52 The patient's environment (shower head rosette, drain, shower chair or trolley,  
53 bedside table, patient chair, instruments in contact with the patient) was sampled  
54 over a 10cm<sup>2</sup> area by a Polywipe™ sponge. The sponge was placed in tryptic soy  
55  
56  
57  
58  
59  
60

1  
2  
3 broth incubated for 24 hours at 37°C then sub-cultured onto CLED and cetrimide  
4  
5 agar. During water sampling, water was taken from the patient's shower, or tap if a  
6  
7 shower was not present. Shower heads were not removed for water sampling. At  
8  
9 least 200ml of water was collected into a vessel containing sodium thiosulphate as a  
10  
11 neutraliser. In duplicate, 100ml of water was filtered through a 0.45 micron filter and  
12  
13 the filters placed onto CLED plates and cetrimide agar. Plates were incubated at  
14  
15 37°C for 48 hours and the number of organisms per 100ml quantified.  
16  
17

18  
19 For storage and DNA extraction a single colony was purified from the primary culture  
20  
21 plate. When different colony morphologies were observed, a single colony from each  
22  
23 type was purified. Additionally, for a randomly selected water sample, 24 colonies  
24  
25 were individually picked from one water-filter primary microbiological plate for  
26  
27 sequencing. Isolates were stored on Biobank beads at -20°C prior to DNA extraction.  
28  
29 Organisms were resuscitated on CLED agar plates and genome DNA either  
30  
31 extracted directly using the MOBIO UltraClean Microbial DNA Kit, or from overnight  
32  
33 LB broth culture using a Qiagen Genomic-Tip 100G.  
34  
35  
36  
37

### 38 **DNA extraction and sequencing**

39  
40 Genomic DNA was prepared from single colony picks using the MIOBIO Ultraclean  
41  
42 microbial kit (MOBIO, Carlsbad, USA). 1ng input DNA, as quantified by Qubit (Life  
43  
44 Technologies, Carlsbad, USA) was used to prepare genomic libraries for sequencing  
45  
46 using the Illumina Nextera XT™ DNA sample kit as per manufacturer's protocol  
47  
48 (Illumina, San Diego, USA). Libraries were sequenced on the Illumina MiSeq using a  
49  
50 paired-end protocol resulting in read lengths between 150 and 300 bases. A single  
51  
52 additional sample, isolate 910, was chosen as a representative member of Clade 5  
53  
54 for long-read sequencing. DNA from this sample was fragmented using a  
55  
56  
57  
58  
59  
60

1  
2  
3 Hydroshear (Digilab, Marlborough, MA) using the recommended protocol for 10kb  
4 fragments and further size-selected on a Blue Pippin instrument (Sage Science,  
5 MA) with a 7kb minimum size cut-off. The library was sequenced on two SMRT Cells  
6 using the Pacific Biosciences RS II instrument at the Norwegian Sequencing Centre,  
7 Oslo. C4-P2 chemistry was chosen because it favours long, more accurate reads for  
8 *de novo* assembly.  
9  
10  
11  
12  
13  
14  
15

### 16 17 **Stool PCR**

18  
19 For simple presence/absence detection of *P. aeruginosa* in stool samples using  
20 PCR, a stool sample was collected into a stool collection tube containing stool DNA  
21 stabilizer. Total DNA was extracted using the PSP Spin Stool DNA Plus kit (Strattec  
22 Molecular). PCR amplification of species specific regions of the 16S rDNA gene was  
23 carried out using primers PA-SS-F: GGGGGATCTTCGGACCTCA and PA-SS-R:  
24 TCCTTAGAGTGCCACCCG [12] in the following conditions: 0.5µM of each primer,  
25 1.5mM MgCl<sub>2</sub>, 0.2mM dNTP's using BIOTAQ™ DNA Polymerase and buffer set.  
26  
27 After initial denaturation at 96°C for 2 minutes, 30 cycles of 96°C for 30 seconds, 62°  
28 C for 30 seconds and 72°C for 30 seconds were completed with a final extension of  
29 72°C for 5 minutes. Products were visualised for size on an 1.5% agarose gel.  
30  
31  
32  
33  
34  
35  
36  
37  
38  
39  
40  
41  
42

### 43 **Bioinformatics methods**

44  
45  
46 Illumina MiSeq reads from each isolate were adapter and quality trimmed before use  
47 with Trimmomatic.[27] Phylogenetic reconstruction of isolates sequenced in this  
48 study were combined with data from a global collection of 55 *P. aeruginosa* strains  
49 collected world-wide which have been previously analysed by Stewart et al. [28] For  
50 each of the published strains, 600,000 paired-end reads of length 250 bases were  
51 simulated using wgsim (<https://github.com/lh3/wgsim>) from the complete or draft  
52  
53  
54  
55  
56  
57  
58  
59  
60

1  
2  
3 genome assembly deposited in Genbank. Read sets were mapped against the *P.*  
4 *aeruginosa* PAO1 reference genome using BWA-MEM 0.7.5a-r405 using default  
5 settings.[29] Single nucleotide polymorphisms were called using VarScan 2.3.6 and  
6 filtered for regions with an excessive number of variants. These may represent  
7 regions of recombination, misalignments or strong Darwinian selection.[30] FastTree  
8 (version 2.1.7) was used for phylogenetic reconstruction. This software estimates an  
9 approximate maximum-likelihood tree under the Jukes-Cantor model of nucleotide  
10 evolution with a single rate for each site (CAT).[31] Trees were drawn in FigTree  
11 (<http://tree.bio.ed.ac.uk/software/figtree/>).

12  
13  
14 For *in silico* MLST prediction, trimmed reads were assembled *de novo* using Velvet  
15 [32] with a k-mer size of 81 and searched using nucleotide BLAST against the multi-  
16 locus sequence database downloaded from the pubMLST website on 2013-08-05  
17 (<http://pubmlst.org/paeruginosa/>) [33]. For Clade E isolates, in order to exhaustively  
18 search for discriminatory mutations, a nearly complete reference genome was  
19 generated by *de novo* assembly using Pacific Biosciences sequencing data. Reads  
20 were assembled using the 'RS\_HGAP\_Assembly.3' pipeline within SMRT Portal  
21 v2.2.0. Illumina reads from the same sample were mapped to this draft genome  
22 assembly in order to correct remaining indel errors in the assembly using Pilon  
23 (<http://www.broadinstitute.org/software/pilon/>). Isolates belonging to each clade were  
24 mapped individually against either the PacBio reference (Clade E) or *P. aeruginosa*  
25 PAO1 (NC\_002516) (Clades C, D and G).

26  
27  
28 Variants (single nucleotide polymorphisms and short insertion-deletions) were called  
29 using SAMtools mpileup and VarScan with an allele frequency threshold of 80%.**[30]**  
30  
31 Non-informative positions and regions of putative recombination were removed, the  
32  
33  
34  
35  
36  
37  
38  
39  
40  
41  
42  
43  
44  
45  
46  
47  
48  
49  
50  
51  
52  
53  
54  
55  
56  
57  
58  
59  
60



1  
2  
3 later with a variant density filter of more than 3 SNPs every 1000 nucleotides.  
4  
5 Analysing samples in each clade individually maximised the number of variants  
6  
7 detected by reducing the likelihood of the position being uncovered by a subset of  
8  
9 samples. From these variants fine-grained phylogenetic trees were reconstructed for  
10  
11 each clade using FastTree. The scripts used to perform this analysis are available at  
12  
13 [http://www.github.com/joshquick/snp\\_calling\\_scripts](http://www.github.com/joshquick/snp_calling_scripts). Approximate-maximum-  
14  
15 likelihood phylogenetic trees were generated using FastTree and visualised in  
16  
17 FigTree. For whole-genome shotgun metagenomics analysis, reads were analysed  
18  
19 using the Kraken taxonomic classifier software with the supplied *minikraken*  
20  
21 database.<sup>[34]</sup> Reads from the metagenomics dataset were aligned to *P. aeruginosa*  
22  
23 PAO1 as in the previous section and phylogenetic placement was carried out using  
24  
25 pplacer in conjunction with FastTree.<sup>[35]</sup> Sequence data is available from the  
26  
27 European Nucleotide Archive for the Illumina data (ERP006056) and the corrected  
28  
29 Pacific Biosciences assembly (ERP006058).  
30  
31  
32  
33

## 34 RESULTS

### 35 Study results

36  
37 Recruitment lasted a period of 300 days, ending according to protocol after the  
38  
39 enrolment of 30 screening patients. In total, we detected *P. aeruginosa* in five  
40  
41 patients. Of these patients, three had *P. aeruginosa* detected only in burns wound  
42  
43 swabs, one had *P. aeruginosa* detected in both their burns wound and in their urine,  
44  
45 and one had *P. aeruginosa* in their sputum. One additional eligible patient did not  
46  
47 consent to enter the study and was excluded. The average age in the study group  
48  
49 was 41 years. Males predominated with a male-to-female ration of 2.3:1. Flame  
50  
51 burns were the most common mechanism of injury, followed by scalds and mixed  
52  
53 flame/flash injuries. The average burn size of the study group was 12.5% of the total  
54  
55  
56  
57  
58  
59  
60

1  
2  
3 body surface area (TBSA) and 27% of patients sustained an inhalation injury. Eight  
4  
5 patients required admission to ITU and the majority required surgical treatment of  
6  
7 their burns with excision and skin grafting (80%). A large majority of the study group  
8  
9 (83%) received shower cart hydrotherapy as a routine part of their wound  
10  
11 management to encourage healing through wound debridement and  
12  
13 decontamination. The average length of hospital stay (LOS) was 17 days and taking  
14  
15 into account burn size, the average was 1.4 days per % TBSA.  
16  
17  
18

19  
20 **The water and environment in burns and critical care units are frequently**  
21  
22 **colonised by *P. aeruginosa***  
23

24  
25 A total of 282 water and environmental samples were screened for *P. aeruginosa* of  
26  
27 which 39/78 (50%) were positive in water samples, 25/96 (26%) were positive from  
28  
29 the wet environment and 7/108 (6%) were positive from the dry environment. A total  
30  
31 of 86 genome sequences were generated from the 71 positives, as in some cases  
32  
33 multiple colony picks were sequenced. 78 patient samples were screened for *P.*  
34  
35 *aeruginosa* of which 39 (50%) were positive. A total of 55 genome sequences were  
36  
37 generated, as in some cases multiple colony picks were sequenced. In total, 141  
38  
39 genomes were sequenced; water and environmental (n=86) and patient (n=55).  
40  
41 Genomes were sequenced to a mean coverage of 24.4x, with the minimum  
42  
43 coverage of a sample being 14x and highest 64.7x.  
44  
45  
46

47  
48 When placed in the context of a global collection of *P. aeruginosa* strains,  
49  
50 phylogenetic reconstruction demonstrated isolates in our study fell into eight clades  
51  
52 (figure 1, Panel A). As has been reported previously, there was no strong association  
53  
54 between ecological context and position in the phylogenetic tree.[28] Isolates in this  
55  
56 study are most closely related to strains from a variety of settings. The majority of  
57  
58  
59  
60

1  
2  
3 isolates (52%) belong to Clade E (figure 1 Panel B), whose nearest sequenced  
4  
5 relative is the Liverpool Epidemic Strain, a clone often isolated from patients in the  
6  
7 UK and Canada with cystic fibrosis. [36,37] Isolates from Clade E were found in the  
8  
9 burns unit's water and the ward environment, as well as from two patient's wounds.  
10  
11 However it was never detected in the critical care unit. Clade E was detected  
12  
13 throughout the study in a total of 10 different rooms (figure 2).  
14  
15

### 16 17 **Inferring potential transmission events by whole-genome sequencing**

18  
19 Microevolutionary changes occurring over rapid time-scales (i.e. days to months)  
20  
21 have been used to detect potential chains of transmission in hospital and community  
22  
23 outbreaks.[19-21,38,39] The number of distinct mutations between given isolates  
24  
25 has been used to infer whether transmission events are likely to have occurred.  
26  
27 Such inferences are aided by prior knowledge of mutation rates in similar  
28  
29 populations. Two patients (1 and 4) in our study both had *P. aeruginosa* from Clade  
30  
31 E isolated from their wounds. These isolates had an indistinguishable genotype from  
32  
33 those present in water and the environment of the room they were nursed within  
34  
35 (figure 1 Panel C and figure 3). This genotype was detected in the patient's shower  
36  
37 water after initial patient screening, during screening of the second patient  
38  
39 admission, twice during the second patient's stay and then 127 days later (days 27,  
40  
41 65, 89 and 216 respectively). When water isolates were positive, the genotype was  
42  
43 also detected in wet environment sites (shower drain, shower rosette and patient's  
44  
45 trolley) on the same days.  
46  
47  
48  
49  
50

51  
52 Patient 5 was nursed on the critical care unit due to concomitant medical problems.  
53  
54 *P. aeruginosa* belonging to Clade G was isolated from sputum during this time.  
55  
56  
57  
58  
59  
60

1  
2  
3 Identical genotypes were detected contemporaneously in the water from the  
4 associated sink and sink tap handle (see online supplementary appendix 4).  
5  
6  
7

8 Two further patients (patients 2 and 3) were positive for *P. aeruginosa*. Isolates from  
9 these patients belonged to Clade C and D respectively. Neither clade was ever  
10 isolated from hospital water. In both cases, identical genotypes were detectable in  
11 the environment associated with the patient but these were not detected before or  
12 after the patients' stay, indicating that the environment was not persistently  
13 contaminated. During the course of patient 3's stay, the dry environment such as the  
14 bedside table was contaminated, as was the patient's door handle and shower chair.  
15 However, after patient discharge, the strain associated with this patient was never  
16 seen again during the course of the study in any location.  
17  
18  
19  
20  
21  
22  
23  
24  
25  
26  
27  
28

### 29 **Whole-genome sequencing permits source tracking of *P. aeruginosa* to** 30 **individual water outlets** 31 32

33  
34 Whole-genome sequencing has been reported previously for source tracking, but  
35 never for the detection of transmission events from hospital water.[40] Phylogenetic  
36 reconstruction within Clade E, the most commonly detected water clone  
37 demonstrated additional diversity within this clone, with a total of 46 mutations  
38 detected an average genetic distance between isolates of 4.1 mutations (figure 3).  
39 The reconstruction demonstrated clear evidence of clustering of genotypes both by  
40 room and outlet (figure 3). When *P. aeruginosa* was detected in the wet environment  
41 (e.g. shower rosettes and drains) these genotypes were most often identical to those  
42 found in water, indicating that the water was likely the ultimate source of that clone.  
43 Genotypic variation was seen between outlets within the same room. For example,  
44 tap water sampled from room 11 had a distinct genotype from that sampled from  
45  
46  
47  
48  
49  
50  
51  
52  
53  
54  
55  
56  
57  
58  
59  
60

1  
2  
3 shower water in the same room and this was consistently found over multiple  
4  
5 samplings. Notably, isolates from two patients fell within the cluster originating from  
6  
7 shower water, indicating that shower hydrotherapy was the most likely source of  
8  
9 infection. Two plasmids (designated pBURNS1 and pBURNS2) were detected in this  
10  
11 study set, which both demonstrated geographical clustering, with pBURNS1 only  
12  
13 being detectable in isolates from room 8 and pBURNS2 only being detectable in  
14  
15 isolates from the shower water in room 9.  
16  
17  
18

### 19 **Rapid evolution of antibiotic resistance associated with treatment**

20  
21  
22 *P. aeruginosa* is commonly associated with antibiotic resistance due to a number of  
23  
24 predisposing features including intrinsic resistance, a repertoire of efflux pumps and  
25  
26 antibiotic-inactivating enzymes including beta-lactamases. [41] Three infected  
27  
28 patients (2, 3 and 5) received antibiotic therapy, and in each case this was  
29  
30 associated with the development of resistance to at least one therapeutic agent.  
31  
32 Associated mutations were detected that were either partially or fully explanatory of  
33  
34 the phenotype (online supplementary appendix 12).  
35  
36  
37

38  
39 Patient 2 was treated with ciprofloxacin, nitrofurantoin and vancomycin (see online  
40  
41 supplementary appendix 11 for full details). 8/21 (38%) tested isolates from this  
42  
43 patient were ciprofloxacin resistant. 7/8 isolates (88%) of the ciprofloxacin-resistant  
44  
45 strains were distinguishable from the other isolates by a single SNP in *mexS*  
46  
47 (annotated as PA2491 in *P. aeruginosa* PAO1) (see online supplementary appendix  
48  
49 1 and 7). This SNP was predicted to result in a non-synonymous amino acid  
50  
51 substitution. Disruption of this gene has been shown to cause increased expression  
52  
53 of the *mexEF-oprN* multidrug efflux pump, associated with resistance to  
54  
55 quinolones.[42]  
56  
57  
58  
59  
60

1  
2  
3 Patient 3 was not treated with antibiotics, but isolates associated with this patient  
4  
5 demonstrated differences in resistance to timentin and piperacillin-tazobactam.  
6

7 These changes were associated with non-synonymous mutations in *gacA*, the  
8 response regulator of the GacA/GacS two-component system and in *lasR*, a  
9 transcriptional activator required for transcription of elastase and LasA protease  
10  
11 (online supplementary appendices 2 and 8).  
12  
13  
14  
15

16  
17 Patient 4 was treated with meropenem, piperacillin/tazobactam, flucloxacillin and  
18 colistin. Five isolates collected 10 to 18 days after initiation of meropenem showed  
19 resistance to imipenem and intermediate resistance to meropenem (see online  
20 supplementary appendix 3 and 9). The most likely mutation responsible for this  
21 phenotype was detectable in two isolates, both of which had a frame-shift mutation in  
22 the gene coding for the membrane porin *oprD*. [43]  
23  
24  
25  
26  
27  
28  
29

30  
31 Patient 5 had a prolonged stay in ITU and had multiple medical problems including  
32 *A. baumannii* infection and was treated with nine antibiotic agents including  
33 ciprofloxacin, meropenem and piperacillin-tazobactam. Serial isolates from this  
34 patient demonstrated the stepwise acquisition of two mutations (online  
35 supplementary appendix 4). The first was in *nalC*, a probable repressor of the  
36 TetR/AcrR family (online supplementary appendix 10). [44] On inspection of the  
37 sequence alignment in this region, a large deletion of 196 nucleotide bases was  
38 seen compared to the reference PAO1 strain. This mutation was seen in association  
39 with full resistance to piperacillin-tazobactam, ceftazidime, aztreonam, meropenem  
40 and intermediate resistance to ciprofloxacin. This deletion is likely to result in over-  
41 expression of efflux pumps involving the *mexAB-oprM* operon. [44,45] Ciprofloxacin  
42 resistance in a later isolate corresponded to the stepwise acquisition of a second  
43  
44  
45  
46  
47  
48  
49  
50  
51  
52  
53  
54  
55  
56  
57  
58  
59  
60

1  
2  
3 mutation. This mutation is predicted to affect the well-studied DNA gyrase subunit A  
4 gene (*gyrA*) which is strongly associated with ciprofloxacin resistance.[46]  
5  
6  
7

### 8 **Confirmation of *P. aeruginosa* genotypes in biofilms by whole-genome** 9 **metagenomic shotgun sequencing** 10

11  
12  
13 *P. aeruginosa* is able to produce and survive in biofilms. Plumbing parts such as flow  
14 straighteners, shower rosettes, flexible hoses, solenoid valves and thermostatic  
15 mixer valves (TMV) are particularly at risk of biofilm formation due to factors  
16 including surface areas, convoluted designs and inadequate pasteurisation. [47] To  
17 confirm the presence of *P. aeruginosa* in water fittings associated with rooms on the  
18 burns unit, we obtained a TMV removed by the hospital estates team from the  
19 shower in room nine as part of compliance with UK guidelines for managing *P.*  
20 *aeruginosa* in hospitals. On visual inspection, a biofilm was present which was  
21 scraped from the surface with a sterile scalpel. DNA from this biofilm was extracted  
22 for whole-genome shotgun sequencing. The majority of reads did not map to any  
23 known bacterial taxa. The most abundant taxon identified was *Pseudomonas*  
24 *aeruginosa* (3%). Subsequent alignment to the *P. aeruginosa* PAO1 reference  
25 covered 94% of the 6.3 million base reference genome at a median coverage of 5x,  
26 confirming that reads were correctly classified to this species and not other  
27 environmental *Pseudomonas* species. Alignment to the *P. aeruginosa* Clade E  
28 reference genome followed by phylogenetic placement of reads demonstrated that it  
29 fell into the same clade as previously recovered isolates from the shower or tap in  
30 room 9 (indicated on figure 3, and in online supplementary appendix 6).  
31  
32  
33  
34  
35  
36  
37  
38  
39  
40  
41  
42  
43  
44  
45  
46  
47  
48  
49  
50  
51  
52

### 53 **DISCUSSION** 54 55 56 57 58 59 60

1  
2  
3 The hospital environment has been intimately linked with *P. aeruginosa* infection for  
4  
5 over 50 years yet hospital acquisitions, clusters and outbreaks remain a common  
6  
7 occurrence and understanding precise routes of transmission can be difficult. [47,48]  
8

9  
10 Our results demonstrate that, even in a new hospital, *P. aeruginosa* can become  
11  
12 rapidly endemic in hospital plumbing. Furthermore, by linking *P. aeruginosa*  
13  
14 genotypes recovered from patients to specific individual water outlets, we offer  
15  
16 compelling evidence of unidirectional transmission from water to patients. Further, by  
17  
18 sequencing of a biofilm identified in a TMV from a hospital water system, we can  
19  
20 identify the likely common source of genotypes found in water and in the hospital  
21  
22 environment.  
23

24  
25  
26 Our results suggest that use of whole-genome sequencing can reduce ambiguity  
27  
28 about potential transmission events in hospitals and consequently inform infection  
29  
30 prevention efforts about the direction and sequence of transmission. Typing  
31  
32 schemes such as MLST and PFGE are much lower resolution methods and would  
33  
34 not be able to provide sufficient information to permit such inferences to be made. It  
35  
36 is notable that the burns unit was colonised by a single clone, meaning that it was  
37  
38 very unlikely that water outlets at each bed space were colonised as a result of  
39  
40 transmissions from the patient or environment. For this to happen would require  
41  
42 multiple transmission events from separate patients with the same clone, for which  
43  
44 there is not evidence. Instead we speculate that this clone was introduced to the  
45  
46 hospital associated with its commissioning. One hypothesis is that particular  
47  
48 plumbing fittings, i.e. the TMV may have been colonised simultaneously by a clone  
49  
50 circulating in water. Clade E (ST395) has been frequently reported associated with  
51  
52 water, so this remains a possibility. [49,50] However, it is possible that plumbing  
53  
54 fittings are installed 'pre-seeded' with *P. aeruginosa* as has already been proposed  
55  
56  
57  
58  
59  
60



1  
2  
3 by Kelsey.[3,5,47] Investigation of an outbreak in Wales implicated new plumbing  
4 parts as a potential source of *P. aeruginosa*. New plumbing components are often  
5 tested by companies prior to their supply and it is possible they were contaminated  
6 prior to distribution. The limited amount of diversity (average 4 SNPs) seen within  
7 this clade is consistent with a single founding genotype coinciding with the opening  
8 of the burns unit, based on estimates from a previous study using WGS which  
9 reported that mutations accumulate at a rate of approximately one every 3-4 months  
10 in a hospital-associated clone.[51] However our results suggest that our isolates  
11 accumulate mutations even more slowly. This may be due to reduced growth rates in  
12 nutritionally-poor biofilms.[52]  
13  
14  
15  
16  
17  
18  
19  
20  
21  
22  
23  
24  
25

26 It is notable that antibiotic resistance to multiple first-line agents developed rapidly in  
27 response to therapy. These results underline the importance of selecting appropriate  
28 antibiotic therapy in *P. aeruginosa* infections. It is reassuring however that antibiotic  
29 resistance genotypes selected *in vivo* did not show evidence of persistence in the  
30 ward environment or transmission to other patients.  
31  
32  
33  
34  
35  
36  
37

38 Our study has certain limitations. Based on a previous audit, we expected around  
39 one-third of patients screened for *P. aeruginosa* would develop colonisation or  
40 clinical infection. In fact, only 5 out of 30 of patients were colonised. This may have  
41 been related to guidance and engineering interventions being put in place during the  
42 study as detailed in national guidance issued whilst this study was on-going. In  
43 addition, infection control policies were revised to address control of an outbreak of a  
44 multi-drug resistant *A. baumannii* in this same burns unit. Following these  
45 interventions, only 1 of the last 20 patients recruited was infected with *P. aeruginosa*  
46  
47  
48  
49  
50  
51  
52  
53  
54  
55  
56  
57  
58  
59  
60

1  
2  
3 which may demonstrate the importance of national guidance in reducing  
4  
5 transmissions.  
6  
7

8  
9 By focusing on burns patients who receive hydrotherapy, our study population were  
10  
11 at extremely high risk of waterborne infection. In other patient groups it may be that  
12  
13 alternative routes of transmission including cross-infection or endogenous carriage  
14  
15 play a more important role. Our results suggest that our burns unit is endemically  
16  
17 colonised with a distinct clone of *P. aeruginosa* that may have been imported  
18  
19 coinciding with the opening of the hospital. Other intensive care units, particularly  
20  
21 those which have been open for longer may have harbour a greater diversity of *P.*  
22  
23 *aeruginosa* as a result of increased opportunities for clones to be imported.  
24  
25

26  
27 One potential application for WGS in infection control would be to determine whether  
28  
29 cases are as a result of water transmission, or represent sporadic clones originating  
30  
31 from the wider environment. Despite improved guidance concerning improved  
32  
33 engineering infection control practices and the introduction of the water safety group  
34  
35 in the UK, it may not be realistic to eliminate *P. aeruginosa* from hospitals entirely. In  
36  
37 augmented care units such as ITUs, burns units and neonatal wards where *P.*  
38  
39 *aeruginosa* poses a significant risk to vulnerable patients, the increased resolution  
40  
41 offered by WGS will justify its use, particularly as the costs continue to fall.  
42  
43  
44

45  
46 In conclusion, we have identified through WGS clear evidence for transmission of *P.*  
47  
48 *aeruginosa* from specific water outlets to burns patients and offer a forensic-level  
49  
50 framework for dealing with outbreaks linked to hospital water. We expect WGS will  
51  
52 continue to make inroads into clinical microbiology and become a vital tool for  
53  
54 tracking *P. aeruginosa* in the hospital environment, helping inform targeted control  
55  
56 measures to help protect patients at risk of infection.  
57  
58  
59  
60

## Acknowledgments

We are grateful to Mark Webber for discussions on antibiotic resistance and to Paul Keim for discussion on phylogenetic placement of metagenomics samples. ~~We thank Chris Thomas for useful discussions about *P. aeruginosa* plasmids.~~ We thank Lex Nederbragt, Ave Tooming-Klunderud and the staff of the Norwegian Sequencing Centre, Oslo for Pacific Biosciences sequencing. We thank Matthew Smith-Banks for laboratory assistance with processing samples. We thank Jimmy Walker for critical reading of the manuscript. We thank Drs David Baltrus, Thomas Connor, Jennifer Gardy and Alan McNally for their helpful comments and suggestions to help improve the manuscript made during the open peer review process.

## Contributors

MP NM BO conceived the study. CW and AB enrolled patients into study and collected samples. NC collected environmental and water samples. NC CC MN processed samples and performed microbiology. NC CC JQ did sequencing. JQ NC CI NL analysed the data. NL NC JQ MP BO wrote the paper. All authors commented on the manuscript draft.

## Funding

This paper presents independent research funded by the National Institute for Health research (NIHR). The views expressed are those of the author(s) and not necessarily those of the NHS, the NIHR or the Department of Health.

## Competing interests

None

## Data Sharing Statement

Pacific Biosciences raw data files are available from the corresponding author (Nicholas J Loman, n.j.loman@bham.ac.uk) and will be made available via Data Dryad.

### Ethics approval

The study protocol received approval from National Research Ethics Service committee in the West Midlands (reference number 12/WM/0181).

### REFERENCES

- 1 Reuter S, Sigge A, Wiedeck H, *et al.* Analysis of transmission pathways of *Pseudomonas aeruginosa* between patients and tap water outlets. *Crit Care Med* 2002;**30**:2222–8. doi:10.1097/01.CCM.0000025907.12833.10
- 2 Struelens MJ, Rost F, Deplano A, *et al.* *Pseudomonas aeruginosa* and Enterobacteriaceae bacteremia after biliary endoscopy: an outbreak investigation using DNA macrorestriction analysis. *Am J Med* 1993;**95**:489–98.
- 3 DiazGranados CA, Jones MY, Kongphet-Tran T, *et al.* Outbreak of *Pseudomonas aeruginosa* infection associated with contamination of a flexible bronchoscope. *Infect Control Hosp Epidemiol* 2009;**30**:550–5. doi:10.1086/597235
- 4 Crivaro V, Di Popolo A, Caprio A, *et al.* *Pseudomonas aeruginosa* in a neonatal intensive care unit: molecular epidemiology and infection control measures. *BMC Infect Dis* 2009;**9**:70. doi:10.1186/1471-2334-9-70
- 5 Moolenaar RL, Crutcher JM, San Joaquin VH, *et al.* A prolonged outbreak of *Pseudomonas aeruginosa* in a neonatal intensive care unit: did staff fingernails play a role in disease transmission? *Infect Control Hosp Epidemiol* 2000;**21**:80–5. doi:10.1086/501739
- 6 Trautmann M, Lepper PM, Haller M. Ecology of *Pseudomonas aeruginosa* in the intensive care unit and the evolving role of water outlets as a reservoir of the organism. *Am J Infect Control* 2005;**33**:S41–9. doi:10.1016/j.ajic.2005.03.006
- 7 Foca M, Jakob K, Whittier S, *et al.* Endemic *Pseudomonas aeruginosa* infection in a neonatal intensive care unit. *N Engl J Med* 2000;**343**:695–700. doi:10.1056/NEJM200009073431004
- 8 Kolmos HJ, Thuesen B, Nielsen SV, *et al.* Outbreak of infection in a

- 1  
2  
3 burns unit due to *Pseudomonas aeruginosa* originating from  
4 contaminated tubing used for irrigation of patients. *J Hosp Infect*  
5 1993;**24**:11–21.  
6
- 7  
8 9 Widmer AF, Wenzel RP, Trilla A, *et al.* Outbreak of *Pseudomonas*  
9 *aeruginosa* infections in a surgical intensive care unit: probable  
10 transmission via hands of a health care worker. *Clin Infect Dis*  
11 1993;**16**:372–6.  
12
- 13 10 Srinivasan A, Wolfenden LL, Song X, *et al.* An outbreak of *Pseudomonas*  
14 *aeruginosa* infections associated with flexible bronchoscopes. *N Engl J*  
15 *Med* 2003;**348**:221–7. doi:10.1056/NEJMoa021808  
16
- 17 11 Wise J. Three babies die in pseudomonas outbreak at Belfast neonatal  
18 unit. *BMJ*. 2012;**344**:e592.  
19
- 20 12 Breathnach AS, Cubbon MD, Karunaharan RN, *et al.* Multidrug-resistant  
21 *Pseudomonas aeruginosa* outbreaks in two hospitals: association with  
22 contaminated hospital waste-water systems. *J Hosp Infect* 2012;**82**:19–  
23 24. doi:10.1016/j.jhin.2012.06.007  
24
- 25 13 Walker JT, Jhutti A, Parks S, *et al.* Investigation of healthcare-acquired  
26 infections associated with *Pseudomonas aeruginosa* biofilms in taps in  
27 neonatal units in Northern Ireland. *J Hosp Infect* 2014;**86**:16–23.  
28 doi:10.1016/j.jhin.2013.10.003  
29
- 30 14 *Health Technical Memorandum 04-01: Addendum*. Department of Health  
31 [https://www.gov.uk/government/uploads/system/uploads/attachment\\_data/file/140105/Health\\_Technical\\_Memorandum\\_04-01\\_Addendum.pdf](https://www.gov.uk/government/uploads/system/uploads/attachment_data/file/140105/Health_Technical_Memorandum_04-01_Addendum.pdf)  
32 (accessed 11 Dec2013).  
33  
34  
35
- 36 15 Maiden MC, Bygraves JA, Feil E, *et al.* Multilocus sequence typing: a  
37 portable approach to the identification of clones within populations of  
38 pathogenic microorganisms. *Proc Natl Acad Sci USA* 1998;**95**:3140–5.  
39
- 40 16 Jefferies JMC, Cooper T, Yam T, *et al.* *Pseudomonas aeruginosa*  
41 outbreaks in the neonatal intensive care unit--a systematic review of risk  
42 factors and environmental sources. *J Med Microbiol* 2012;**61**:1052–61.  
43 doi:10.1099/jmm.0.044818-0  
44
- 45 17 Cholley P, Thouverez M, Hocquet D, *et al.* Most multidrug-resistant  
46 *Pseudomonas aeruginosa* isolates from hospitals in eastern France  
47 belong to a few clonal types. *J Clin Microbiol* 2011;**49**:2578–83.  
48 doi:10.1128/JCM.00102-11  
49
- 50 18 Curran B, Jonas D, Grundmann H, *et al.* Development of a multilocus  
51 sequence typing scheme for the opportunistic pathogen *Pseudomonas*  
52 *aeruginosa*. *J Clin Microbiol* 2004;**42**:5644–9.  
53 doi:10.1128/JCM.42.12.5644-5649.2004  
54
- 55 19 Harris SR, Cartwright EJP, Török ME, *et al.* Whole-genome sequencing  
56  
57  
58  
59  
60

- 1  
2  
3 for analysis of an outbreak of meticillin-resistant *Staphylococcus aureus*:  
4 a descriptive study. *Lancet Infect Dis* 2013;**13**:130–6. doi:10.1016/S1473-  
5 3099(12)70268-2  
6
- 7 20 Lewis T, Loman NJ, Bingle L, *et al*. High-throughput whole-genome  
8 sequencing to dissect the epidemiology of *Acinetobacter baumannii*  
9 isolates from a hospital outbreak. *J Hosp Infect* 2010;**75**:37–41.  
10 doi:10.1016/j.jhin.2010.01.012  
11
- 12 21 Snitkin ES, Zelazny AM, Thomas PJ, *et al*. Tracking a hospital outbreak  
13 of carbapenem-resistant *Klebsiella pneumoniae* with whole-genome  
14 sequencing. *Sci Transl Med* 2012;**4**:148ra116.  
15 doi:10.1126/scitranslmed.3004129  
16
- 17 22 Loman NJ, Misra RV, Dallman TJ, *et al*. Performance comparison of  
18 benchtop high-throughput sequencing platforms. *Nat Biotechnol*  
19 2012;**30**:434–9. doi:10.1038/nbt.2198  
20
- 21 23 Tredget EE, Shankowsky HA, Joffe AM, *et al*. Epidemiology of infections  
22 with *Pseudomonas aeruginosa* in burn patients: the role of hydrotherapy.  
23 *Clin Infect Dis* 1992;**15**:941–9.  
24
- 25 24 Langschmidt J, Caine PL, Wearn CM, *et al*. Hydrotherapy in burn care: A  
26 survey of hydrotherapy practices in the UK and Ireland and literature  
27 review. *Burns* Published Online First: 10 December 2013.  
28 doi:10.1016/j.burns.2013.11.006  
29
- 30 25 Tredget EE, Shankowsky HA, Rennie R, *et al*. *Pseudomonas* infections in  
31 the thermally injured patient. *Burns* 2004;**30**:3–26.  
32
- 33 26 Davison PG, Loiselle FB, Nickerson D. Survey on current hydrotherapy  
34 use among North American burn centers. *J Burn Care Res* 2010;**31**:393–  
35 9. doi:10.1097/BCR.0b013e3181db5215  
36
- 37 27 Bolger AM, Lohse M, Usadel B. Trimmomatic: a flexible trimmer for  
38 Illumina sequence data. *Bioinformatics* Published Online First: 28 April  
39 2014. doi:10.1093/bioinformatics/btu170  
40
- 41 28 Stewart L, Ford A, Sangal V, *et al*. Draft genomes of 12 host-adapted and  
42 environmental isolates of *Pseudomonas aeruginosa* and their positions in  
43 the core genome phylogeny. *Pathog Dis* Published Online First: 26  
44 October 2013. doi:10.1111/2049-632X.12107  
45
- 46 29 Li H, Durbin R. Fast and accurate long-read alignment with Burrows-  
47 Wheeler transform. *Bioinformatics* 2010;**26**:589–95.  
48 doi:10.1093/bioinformatics/btp698  
49
- 50 30 Koboldt DC, Zhang Q, Larson DE, *et al*. VarScan 2: somatic mutation and  
51 copy number alteration discovery in cancer by exome sequencing.  
52 *Genome Res* 2012;**22**:568–76. doi:10.1101/gr.129684.111  
53
- 54 31 Price MN, Dehal PS, Arkin AP. FastTree 2--approximately maximum-  
55  
56  
57  
58  
59  
60



- 1  
2  
3 likelihood trees for large alignments. *PLoS One* 2010;**5**:e9490.  
4 doi:10.1371/journal.pone.0009490  
5
- 6 32 Zerbino DR, Birney E. Velvet: algorithms for de novo short read assembly  
7 using de Bruijn graphs. *Genome Res* 2008;**18**:821–9.  
8 doi:10.1101/gr.074492.107  
9
- 10 33 Jolley KA, Maiden MC. BIGSdb: Scalable analysis of bacterial genome  
11 variation at the population level. *BMC Bioinformatics* 2010;**11**:595–5.  
12 doi:10.1186/1471-2105-11-595  
13
- 14 34 Wood DE, Salzberg SL. Kraken: ultrafast metagenomic sequence  
15 classification using exact alignments. *Genome Biol* 2014;**15**:R46.  
16 doi:10.1186/gb-2014-15-3-r46  
17
- 18 35 Matsen FA, Kodner RB, Armbrust EV. pplacer: linear time maximum-  
19 likelihood and Bayesian phylogenetic placement of sequences onto a  
20 fixed reference tree. *BMC Bioinformatics* 2010;**11**:538. doi:10.1186/1471-  
21 2105-11-538  
22
- 23 36 Scott FW, Pitt TL. Identification and characterization of transmissible  
24 *Pseudomonas aeruginosa* strains in cystic fibrosis patients in England  
25 and Wales. *J Med Microbiol* 2004;**53**:609–15.  
26
- 27 37 Panagea S, Winstanley C, Parsons YN, *et al.* PCR-based detection of a  
28 cystic fibrosis epidemic strain of *Pseudomonas Aeruginosa*. *Mol Diagn*  
29 2003;**7**:195–200.  
30
- 31 38 Gardy JL, Johnston JC, Ho Sui SJ, *et al.* Whole-genome sequencing and  
32 social-network analysis of a tuberculosis outbreak. *N Engl J Med*  
33 2011;**364**:730–9. doi:10.1056/NEJMoa1003176  
34
- 35 39 Bryant JM, Grogono DM, Greaves D, *et al.* Whole-genome sequencing to  
36 identify transmission of *Mycobacterium abscessus* between patients with  
37 cystic fibrosis: a retrospective cohort study. *Lancet* 2013;**381**:1551–60.  
38 doi:10.1016/S0140-6736(13)60632-7  
39
- 40 40 Lienau EK, Strain E, Wang C, *et al.* Identification of a salmonellosis  
41 outbreak by means of molecular sequencing. *N Engl J Med*  
42 2011;**364**:981–2. doi:10.1056/NEJMc1100443  
43
- 44 41 Lambert PA. Mechanisms of antibiotic resistance in *Pseudomonas*  
45 *aeruginosa*. *J R Soc Med* 2002;**95 Suppl 41**:22–6.  
46
- 47 42 Sobel ML, Neshat S, Poole K. Mutations in PA2491 (*mexS*) promote  
48 *MexT*-dependent *mexEF-oprN* expression and multidrug resistance in a  
49 clinical strain of *Pseudomonas aeruginosa*. *J Bacteriol* 2005;**187**:1246–  
50 53. doi:10.1128/JB.187.4.1246-1253.2005  
51
- 52 43 Quinn JP, Dudek EJ, DiVincenzo CA, *et al.* Emergence of resistance to  
53 imipenem during therapy for *Pseudomonas aeruginosa* infections. *J*  
54 *Infect Dis* 1986;**154**:289–94.  
55  
56  
57  
58  
59  
60

- 1  
2  
3 44 Cao L, Srikumar R, Poole K. MexAB-OprM hyperexpression in NalC-type  
4 multidrug-resistant *Pseudomonas aeruginosa*: identification and  
5 characterization of the nalC gene encoding a repressor of PA3720-  
6 PA3719. *Mol Microbiol* 2004;**53**:1423–36. doi:10.1111/j.1365-  
7 2958.2004.04210.x  
8  
9  
10 45 Llanes C, Hocquet D, Vogne C, *et al.* Clinical strains of *Pseudomonas*  
11 *aeruginosa* overproducing MexAB-OprM and MexXY efflux pumps  
12 simultaneously. *Antimicrob Agents Chemother* 2004;**48**:1797–802.  
13  
14 46 Cambau E, Perani E, Dib C, *et al.* Role of mutations in DNA gyrase  
15 genes in ciprofloxacin resistance of *Pseudomonas aeruginosa*  
16 susceptible or resistant to imipenem. *Antimicrob Agents Chemother*  
17 1995;**39**:2248–52.  
18  
19 47 Kelsey M. *Pseudomonas* in augmented care: should we worry? *J*  
20 *Antimicrob Chemother* 2013;**68**:2697–700. doi:10.1093/jac/dkt288  
21  
22 48 Rogers DE. The changing pattern of life-threatening microbial disease. *N*  
23 *Engl J Med* 1959;**261**:677–83. doi:10.1056/NEJM195910012611401  
24  
25 49 Martin K, Baddal B, Mustafa N, *et al.* Clusters of genetically similar  
26 isolates of *Pseudomonas aeruginosa* from multiple hospitals in the UK. *J*  
27 *Med Microbiol* 2013;**62**:988–1000. doi:10.1099/jmm.0.054841-0  
28  
29  
30 50 Slekovec C, Plantin J, Cholley P, *et al.* Tracking down antibiotic-resistant  
31 *Pseudomonas aeruginosa* isolates in a wastewater network. *PLoS One*  
32 2012;**7**:e49300. doi:10.1371/journal.pone.0049300  
33  
34 51 Snyder LA, Loman N, Faraj LA, *et al.* Epidemiological investigation of  
35 *Pseudomonas aeruginosa* isolates from a six-year-long hospital outbreak  
36 using high-throughput whole genome sequencing. *Euro Surveill* 2013;**18**.  
37  
38 52 Donlan RM. Biofilm formation: a clinically relevant microbiological  
39 process. *Clin Infect Dis* 2001;**33**:1387–92. doi:10.1086/322972  
40  
41  
42  
43  
44  
45  
46  
47  
48  
49  
50  
51  
52  
53  
54  
55  
56  
57  
58  
59  
60

## Figure and Table Legends

### Figure 1 Legend

An overview of all samples collected during the study in global phylogenetic context with other sequenced strains of *P. aeruginosa* from the set of Stewart *et al.*[28]



1  
2  
3 Samples collected in this study are widely dispersed in the tree, which contains  
4 isolates from different environments (Panel A). Bar plots indicate the numbers of  
5 each type of sample collected (Panel B). Microdiversity within each clade is shown,  
6 with the colour bar indicating the source of each sample (Panel C).  
7  
8  
9  
10  
11

## 12 **Figure 2 Legend**

13  
14  
15  
16 A schematic view of the 300-day study of *P. aeruginosa* in a burns centre and critical  
17 care unit. Time in days is shown along the X-axis with bed numbers in the critical  
18 care unit and burns unit along the Y-axis. Each circular icon indicates a positive  
19 isolate of *P. aeruginosa*. The icon's logotype indicates which environment it  
20 originated from (wound, urine/sputum, environment or water). The filled colour of the  
21 icon indicates the clade it belongs to. Patient icons represent the enrolment of a  
22 screening patient into the study and their location. Patient movements around the  
23 hospital are noted by dotted lines. The five patients infected with *P. aeruginosa* are  
24 denoted by rounded boxes. Boxes are coloured according to the patient number. In  
25 the event two or more isolates of the same source and clade were collected on the  
26 same day, these have been collapsed into a single circular icon.  
27  
28  
29  
30  
31  
32  
33  
34  
35  
36  
37  
38  
39  
40  
41

## 42 **Figure 3 Legend**

43  
44  
45 The high-resolution phylogenetic reconstruction of Clade E isolates. This  
46 demonstrates the clustering of genotypes by bed space. Patient associated samples  
47 are contained within the room 11 clade. This clade contains water samples from the  
48 shower and environmental samples from the shower, drain and trolley. The water  
49 samples from the room 11 tap are in a distinct clade, indicating the biofilm within the  
50 tap has a distinct genotype to the shower. This suggests environmental  
51  
52  
53  
54  
55  
56  
57  
58  
59  
60

1  
2  
3 contamination was more likely to arise from contaminated shower water than tap  
4  
5 water. Details of sampling site, days since start of study and presence of pBURNS  
6  
7 plasmids are also shown. The likely phylogenetic position of *P. aeruginosa* detected  
8  
9 in a biofilm from a thermostatic mixer valve is shown in the clade associated with  
10  
11 room 9 and indicated 'TMV'.  
12  
13

### 14 15 **Appendix 1**

16  
17  
18 Phylogenetic tree, sample origin and antibiotic-resistance phenotype for Clade C  
19  
20 isolates. The patient column refers to the sampling event. If a sample was collected  
21  
22 from a patient colonised with *P. aeruginosa* or that patient's environment the patient  
23  
24 number if marked. Patient numbers starting with SP relate to screening patients who  
25  
26 were not colonised by *P. aeruginosa*.  
27  
28

### 29 30 **Appendix 2**

31  
32 Phylogenetic tree, sample origin and antibiotic-resistance phenotype for Clade D  
33  
34 isolates.  
35  
36

### 37 38 **Appendix 3**

39  
40 Phylogenetic tree, sample origin and antibiotic-resistance phenotype for Clade E  
41  
42 isolates.  
43  
44

### 45 46 **Appendix 4**

47  
48 Phylogenetic tree, sample origin and antibiotic-resistance phenotype for Clade G  
49  
50 isolates.  
51  
52

### 53 54 **Appendix 5**

55  
56 A physical map of the burns unit, indicating individual patient bed areas, shower  
57  
58 areas. The water supply is indicated by a blue line.  
59  
60

**Appendix 6**

Clade E isolates in phylogenetic context with the metagenomics sample from a tap mixer valve.

**Appendix 7**

Single nucleotide and small indel variants detected within Clade C isolates.

**Appendix 8**

Single nucleotide and small indel variants detected within Clade D isolates.

**Appendix 9**

Single nucleotide and small indel variants detected within Clade E isolates.

**Appendix 10**

Single nucleotide and small indel variants detected within Clade G isolates.

**Appendix 11**

The type of antibiotics administered to the five patients in this study.

**Appendix 12**

Mutations predicted to be associated with antibiotic-resistance.

1  
2  
3  
4  
5  
6  
7  
8  
9  
10  
11  
12  
13  
14  
15  
16  
17  
18  
19  
20  
21  
22  
23  
24  
25  
26  
27  
28  
29  
30  
31  
32  
33  
34  
35  
36  
37  
38  
39  
40  
41  
42  
43  
44  
45  
46  
47  
48  
49  
50  
51  
52  
53  
54  
55  
56  
57  
58  
59  
60

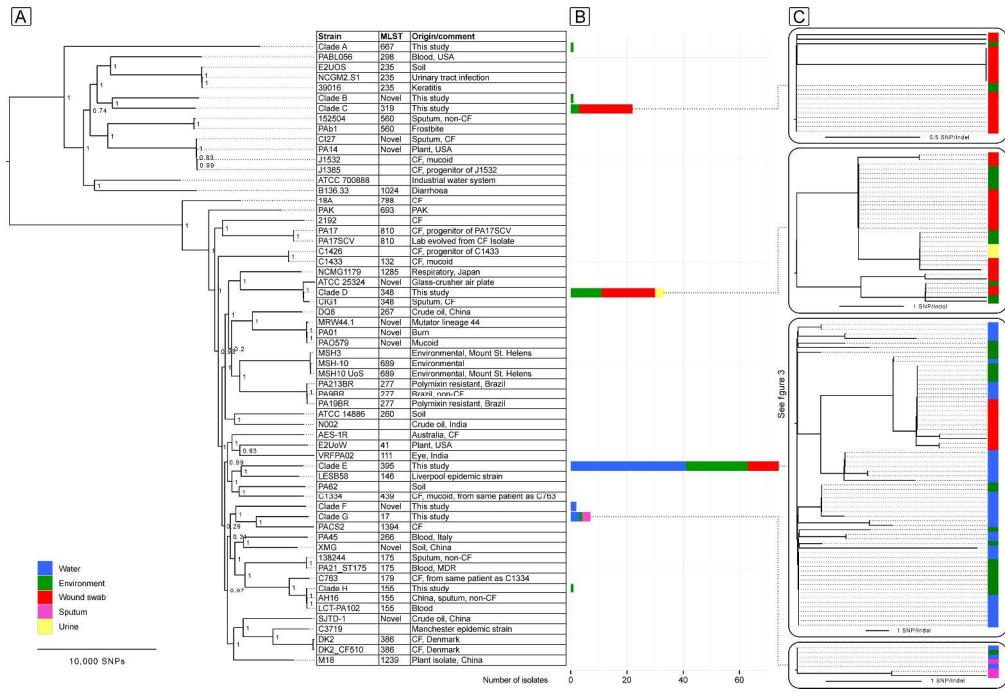

386x263mm (300 x 300 DPI)

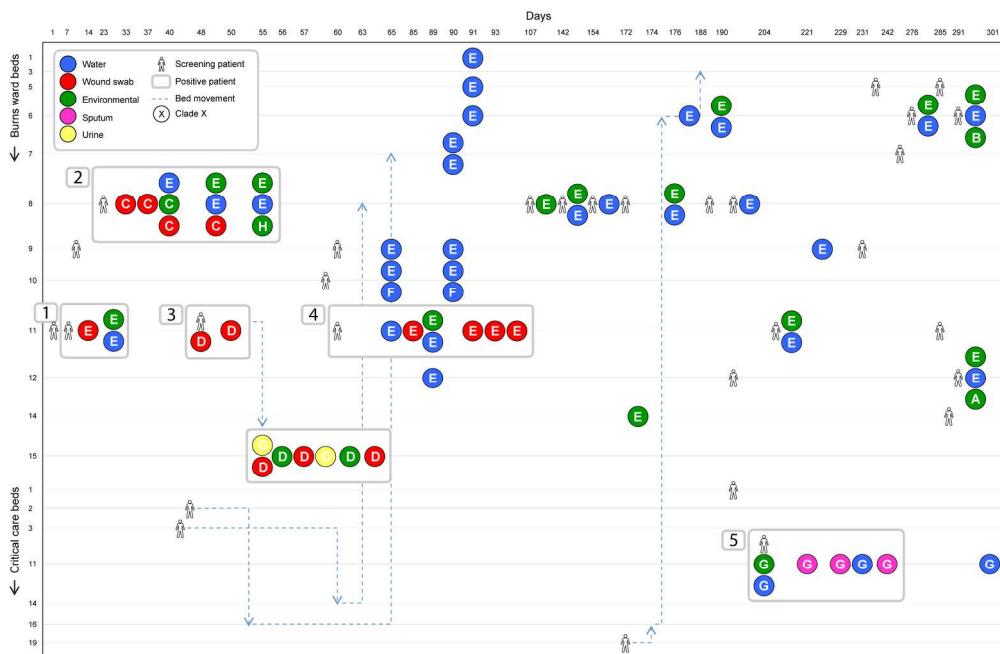

189x122mm (300 x 300 DPI)

Review only

1  
2  
3  
4  
5  
6  
7  
8  
9  
10  
11  
12  
13  
14  
15  
16  
17  
18  
19  
20  
21  
22  
23  
24  
25  
26  
27  
28  
29  
30  
31  
32  
33  
34  
35  
36  
37  
38  
39  
40  
41  
42  
43  
44  
45  
46  
47  
48  
49  
50  
51  
52  
53  
54  
55  
56  
57  
58  
59  
60

1  
2  
3  
4  
5  
6  
7  
8  
9  
10  
11  
12  
13  
14  
15  
16  
17  
18  
19  
20  
21  
22  
23  
24  
25  
26  
27  
28  
29  
30  
31  
32  
33  
34  
35  
36  
37  
38  
39  
40  
41  
42  
43  
44  
45  
46  
47  
48  
49  
50  
51  
52  
53  
54  
55  
56  
57  
58  
59  
60

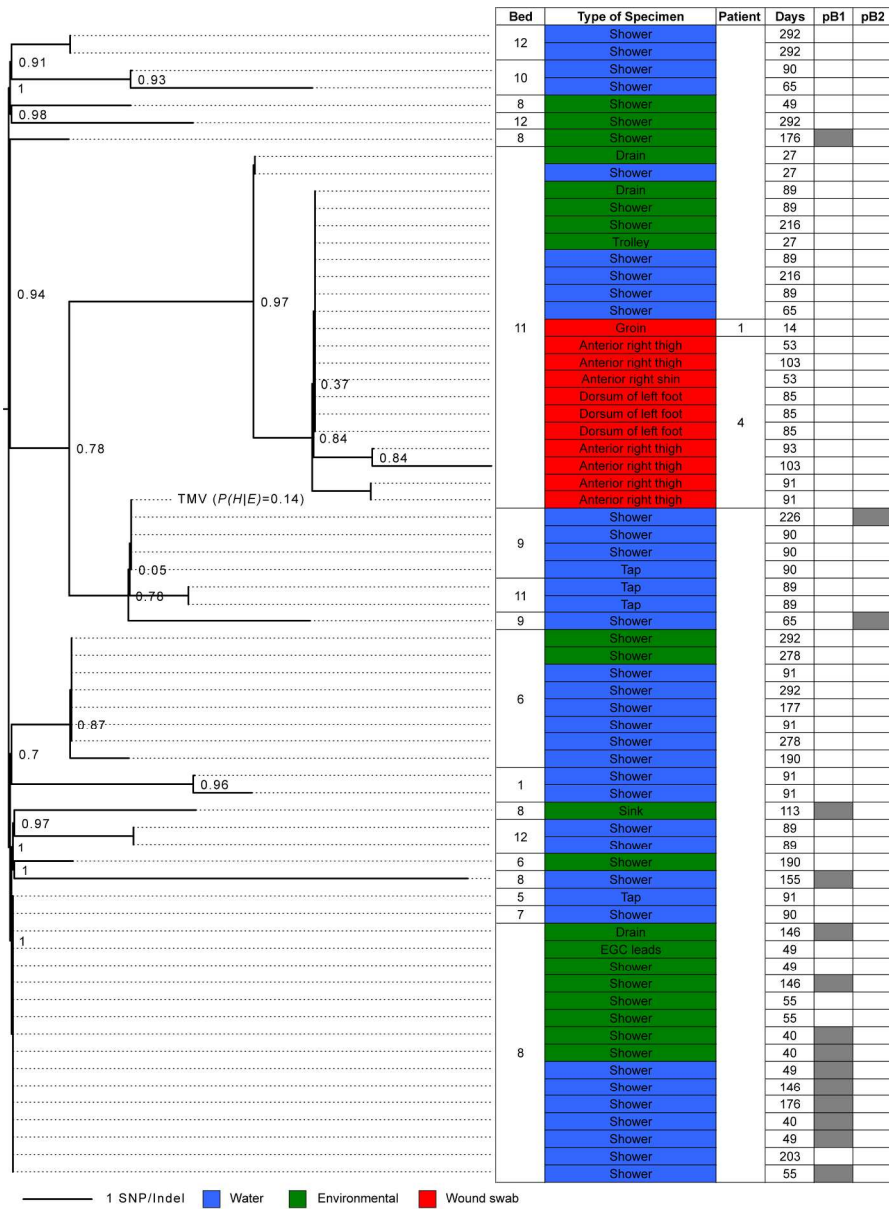

186x250mm (300 x 300 DPI)

| Sample Number | Patient | Ward | Bed | Type of Specimen | Site                     | Days | TIM | PIP | TAZ | CAZ | AZT | IMI | MER | AMI | GEN | TOB | CIP | COL |
|---------------|---------|------|-----|------------------|--------------------------|------|-----|-----|-----|-----|-----|-----|-----|-----|-----|-----|-----|-----|
| 922           | P02     | BCU  | 8   | Wound swab       | Upper back               | 40   | R   | I   | I   | S   | I   | S   | S   | S   | S   | S   | S   | S   |
| 921           | P02     | BCU  | 8   | Wound swab       | Upper back               | 40   |     |     |     |     |     |     |     |     |     |     |     |     |
| 913           | P02     | BCU  | 8   | Environmental    | Shower trolley           | 40   | R   | S   | S   | S   | I   | S   | S   | S   | S   | S   | S   | S   |
| 919           | P02     | BCU  | 8   | Wound swab       | Chest                    | 40   | R   | I   | I   | S   | I   | I   | S   | S   | S   | S   | R   | S   |
| 926           | P02     | BCU  | 8   | Wound swab       | Right palm               | 44   | R   | I   | I   | S   | I   | I   | S   | S   | S   | S   | R   | S   |
| 909           | P02     | BCU  | 8   | Wound swab       | Anterior left upper-arm  | 37   | R   | I   | I   | S   | I   | R   | S   | S   | S   | S   | R   | S   |
| 908           | P02     | BCU  | 8   | Wound swab       | Anterior left upper-arm  | 37   | R   | I   | I   | S   | I   | S   | S   | S   | S   | S   | S   | S   |
| 925           | P02     | BCU  | 8   | Wound swab       | Anterior left upper-arm  | 44   | R   | I   | I   | S   | I   | I   | S   | S   | S   | S   | R   | S   |
| 932           | P02     | BCU  | 8   | Wound swab       | Back of head             | 49   | R   | I   | I   | S   | I   | R   | S   | S   | S   | S   | R   | S   |
| 928           | P02     | BCU  | 8   | Wound swab       | Upper back               | 44   | R   | I   | I   | S   | I   | I   | I   | S   | S   | S   | R   | S   |
| 927           | P02     | BCU  | 8   | Wound swab       | Upper back               | 44   | R   | I   | I   | S   | I   | I   | I   | S   | S   | S   | R   | S   |
| 915           | P02     | BCU  | 8   | Environmental    | Chair                    | 40   | R   | I   | I   | S   | I   | S   | S   | S   | S   | S   | S   | S   |
| 914           | P02     | BCU  | 8   | Environmental    | Chair                    | 40   | R   | S   | S   | S   | I   | S   | S   | S   | S   | S   | S   | S   |
| 904           | P02     | BCU  | 8   | Tissue           | Anterior right upper-arm | 33   | R   | S   | S   | S   | I   | S   | S   | S   | S   | S   | S   | S   |
| 905           | P02     | BCU  | 8   | Wound swab       | Chest                    | 37   | R   | I   | I   | S   | I   | I   | S   | S   | S   | S   | S   | S   |
| 906           | P02     | BCU  | 8   | Wound swab       | Chest                    | 37   | R   | I   | I   | S   | I   | I   | S   | S   | S   | S   | S   | S   |
| 920           | P02     | BCU  | 8   | Wound swab       | Chest                    | 40   | R   | I   | I   | S   | I   | R   | I   | S   | S   | S   | R   | S   |
| 918           | P02     | BCU  | 8   | Wound swab       | Chest                    | 40   | R   | I   | I   | S   | I   | S   | S   | S   | S   | S   | S   | S   |
| 907           | P02     | BCU  | 8   | Wound swab       | Abdomen                  | 37   | R   | I   | I   | S   | I   | S   | S   | S   | S   | S   | S   | S   |
| 911           | P02     | BCU  | 8   | Wound swab       | Anterior left forearm    | 37   | R   | I   | I   | S   | I   | I   | S   | S   | S   | S   | S   | S   |
| 912           | P02     | BCU  | 8   | Wound swab       | Anterior left forearm    | 37   | R   | I   | I   | S   | I   | I   | S   | S   | S   | S   | S   | S   |
| 923           | P02     | BCU  | 8   | Wound swab       | Posterior left upper-arm | 40   | R   | I   | I   | S   | I   | S   | S   | S   | S   | S   | S   | S   |

1 SNP/Indel

1  
2  
3  
4  
5  
6  
7  
8  
9  
10  
11  
12  
13  
14  
15  
16  
17  
18  
19  
20  
21  
22  
23  
24  
25  
26  
27  
28  
29

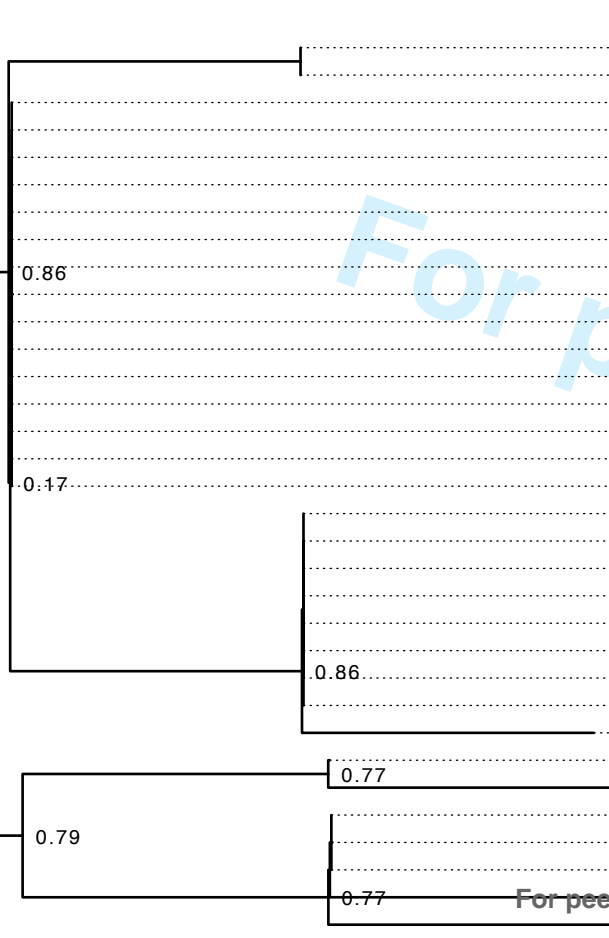

| Study Number | Patient | BMJ | Open | Bed | Type of Specimen | Site                  | Days | TIM | PIP | TAZ | CAZ | AZT | IMI | MER | AMI | GEN | TOB | CIP | COL |
|--------------|---------|-----|------|-----|------------------|-----------------------|------|-----|-----|-----|-----|-----|-----|-----|-----|-----|-----|-----|-----|
| 937          | P03     | BCU |      | 11  | Wound swab       | Anterior left thigh   | 50   |     |     |     |     |     |     |     |     |     |     |     |     |
| 936          | P03     | BCU |      | 11  | Wound swab       | Anterior left thigh   | 50   |     |     |     |     |     |     |     |     |     |     |     |     |
| 929          | P03     | BCU |      | 11  | Wound swab       | Posterior left thigh  | 48   | R   | S   | S   | S   | I   | R   | I   | S   | S   | S   | S   | S   |
| 951          | P03     | BCU |      | 15  | Environmental    | Bedside table         | 56   | R   | I   | I   | S   | I   | R   | I   | S   | S   | S   | S   | S   |
| 960          | P03     | BCU |      | 15  | Environmental    | Bedside table         | 62   | R   | S   | S   | S   | I   | R   | I   | S   | S   | S   | S   | S   |
| 961          | P03     | BCU |      | 15  | Environmental    | Door handle           | 62   | R   | I   | I   | S   | I   | R   | I   | S   | S   | S   | S   | S   |
| 958          | P03     | BCU |      | 15  | Environmental    | Shower chair          | 62   | R   | I   | I   | S   | I   | R   | I   | S   | S   | S   | S   | S   |
| 957          | P03     | BCU |      | 15  | Environmental    | Shower chair          | 62   | R   | S   | S   | S   | I   | R   | I   | S   | S   | S   | S   | S   |
| 940          | P03     | BCU |      | 15  | Wound swab       | Anterior right thigh  | 55   | S   | S   | S   | S   | I   | I   | I   | S   | S   | S   | S   | S   |
| 970          | P03     | BCU |      | 15  | Wound swab       | Anterior right thigh  | 64   | R   | I   | I   | S   | I   | R   | I   | S   | S   | S   | S   | S   |
| 944          | P03     | BCU |      | 15  | Wound swab       | Anterior right shin   | 55   | R   | I   | I   | S   | I   | R   | I   | S   | S   | S   | S   | S   |
| 945          | P03     | BCU |      | 15  | Wound swab       | Anterior right shin   | 55   | R   | S   | S   | S   | I   | R   | I   | S   | S   | S   | S   | S   |
| 946          | P03     | BCU |      | 15  | Wound swab       | Anterior left thigh   | 55   | R   | S   | S   | S   | I   | R   | I   | S   | S   | S   | S   | S   |
| 954          | P03     | BCU |      | 15  | Wound swab       | Anterior left thigh   | 57   | R   | I   | I   | S   | I   | R   | I   | S   | S   | S   | S   | S   |
| 947          | P03     | BCU |      | 15  | Wound swab       | Anterior left shin    | 55   | R   | S   | S   | S   | I   | R   | I   | S   | S   | S   | S   | S   |
| 972          | P03     | BCU |      | 15  | Wound swab       | Posterior left shin   | 64   | S   | S   | S   | S   | I   | R   | I   | S   | S   | S   | S   | S   |
| 949          | P03     | BCU |      | 15  | Wound swab       | Posterior right thigh | 55   | R   | I   | I   | S   | I   | R   | I   | S   | S   | S   | S   | S   |
| 950          | P03     | BCU |      | 15  | Environmental    | Bedside table         | 56   | R   | S   | S   | S   | I   | R   | I   | S   | S   | S   | S   | S   |
| 959          | P03     | BCU |      | 15  | Environmental    | Bedside table         | 62   | R   | I   | I   | S   | I   | R   | I   | S   | S   | S   | S   | S   |
| 953          | P03     | BCU |      | 15  | Environmental    | Toilet flush          | 56   | R   | S   | S   | S   | I   | I   | I   | S   | S   | S   | S   | S   |
| 938          | P03     | BCU |      | 15  | Urine            | Urine                 | 55   | R   | S   | S   | S   | I   | R   | I   | S   | S   | S   | S   | S   |
| 939          | P03     | BCU |      | 15  | Urine            | Urine                 | 55   | R   | S   | S   | S   | I   | R   | I   | S   | S   | S   | S   | S   |
| 956          | P03     | BCU |      | 15  | Urine            | Urine                 | 58   | R   | S   | S   | S   | I   | R   | I   | S   | S   | S   | S   | S   |
| 969          | P03     | BCU |      | 15  | Wound swab       | Anterior right thigh  | 64   | R   | S   | S   | S   | I   | R   | I   | S   | S   | S   | S   | S   |
| 971          | P03     | BCU |      | 15  | Wound swab       | Anterior left thigh   | 64   | R   | I   | I   | S   | I   | R   | I   | S   | S   | S   | S   | S   |
| 973          | P03     | BCU |      | 15  | Wound swab       | Posterior right thigh | 64   | R   | S   | S   | S   | I   | R   | I   | S   | S   | S   | S   | S   |
| 955          | P03     | BCU |      | 15  | Wound swab       | Anterior left thigh   | 57   | S   | S   | S   | S   | I   | R   | I   | S   | S   | S   | S   | S   |
| 975          | P03     | BCU |      | 15  | Wound swab       | Posterior right shin  | 64   | S   | S   | S   | S   | I   | R   | I   | S   | S   | S   | S   | S   |
| 962          | P03     | BCU |      | 15  | Environmental    | Shower chair          | 62   | S   | S   | S   | S   | I   | R   | I   | S   | S   | S   | S   | S   |
| 948          | P03     | BCU |      | 15  | Wound swab       | Posterior right thigh | 55   | S   | S   | S   | S   | I   | R   | I   | S   | S   | S   | S   | S   |
| 974          | P03     | BCU |      | 15  | Wound swab       | Posterior right thigh | 64   | S   | S   | S   | S   | I   | I   | I   | S   | S   | S   | S   | S   |
| 963          | P03     | BCU |      | 15  | Environmental    | Bedside table         | 62   | S   | S   | S   | S   | I   | I   | I   | S   | S   | S   | S   | S   |
| 964          | P03     | BCU |      | 15  | Environmental    | Bedside table         | 62   | S   | S   | S   | S   | I   | R   | I   | S   | S   | S   | S   | S   |

1 SNP/Indel

For peer review only - http://bmjopen.bmj.com/site/about/guidelines.xhtml



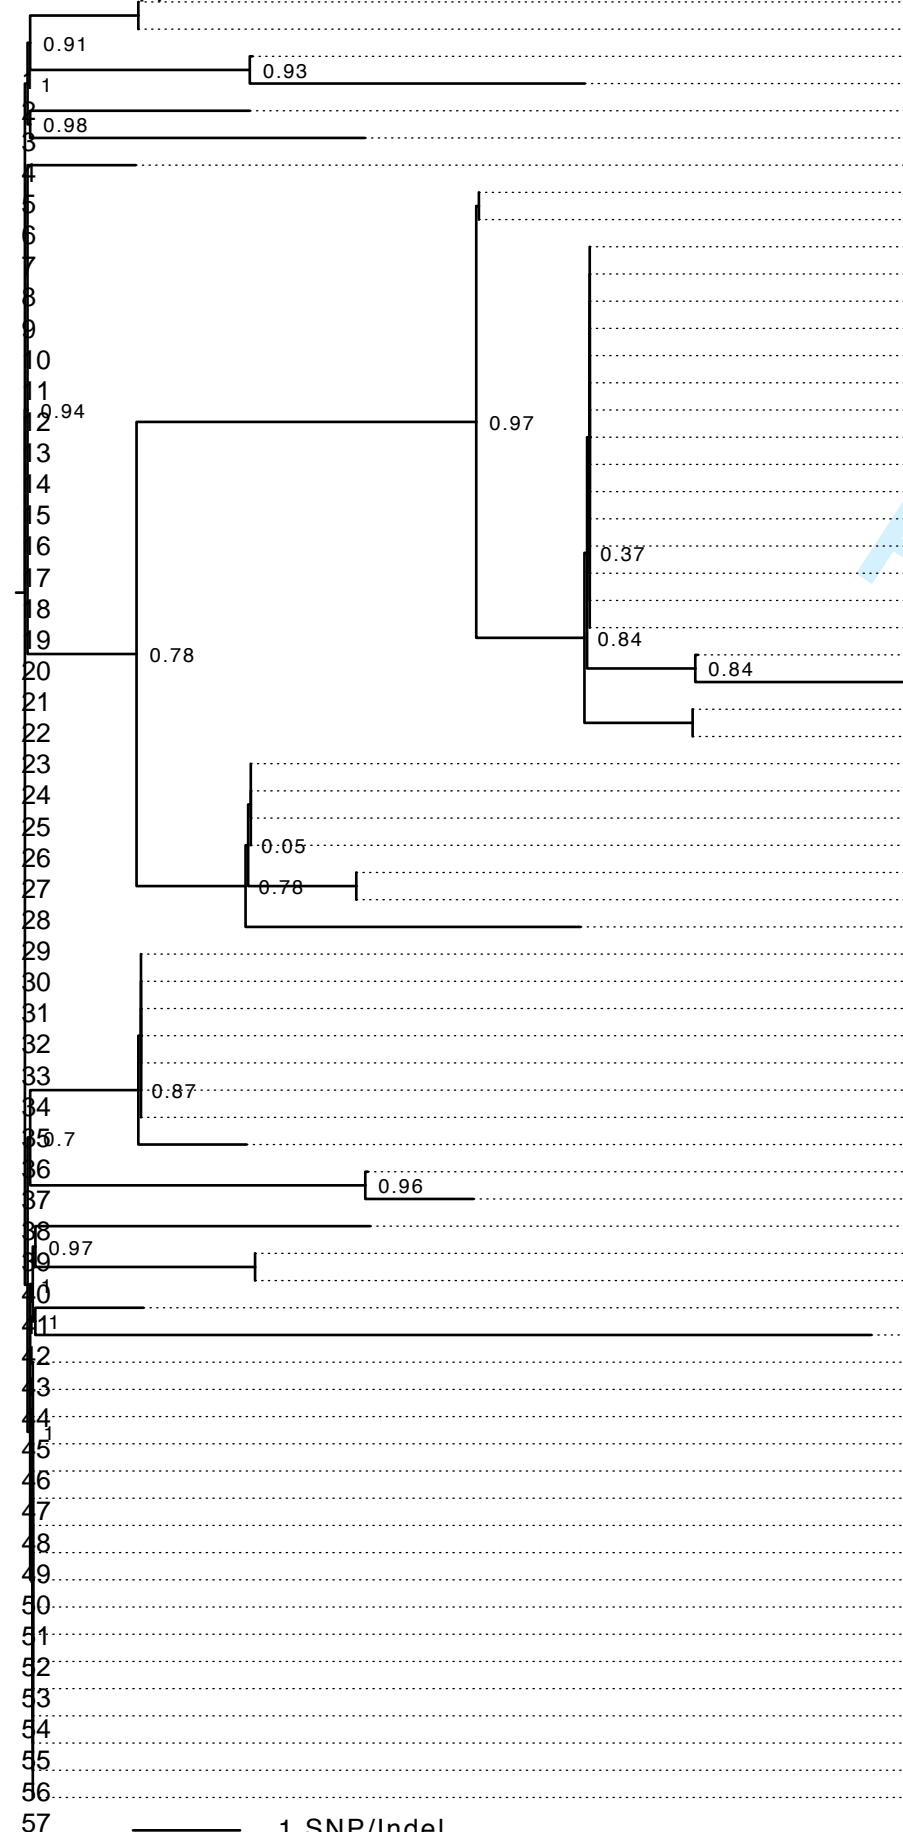

| Sample Number | Patient        | Ward | Bed | Type of Specimen | Site                 | Days | TIM | PIP | TAZ | CAZ | AZT | IMI | MER | AMI | GEN | TOB | CIP | COL | pBURNS1 | pBURNS2 |  |
|---------------|----------------|------|-----|------------------|----------------------|------|-----|-----|-----|-----|-----|-----|-----|-----|-----|-----|-----|-----|---------|---------|--|
| 1067          | SP30           | BCU  | 12  | Water            | Shower (Pre-flush)   | 292  |     |     |     |     |     |     |     |     |     |     |     |     |         |         |  |
| 1068          | SP30           | BCU  | 12  | Water            | Shower (Pre-flush)   | 292  |     |     |     |     |     |     |     |     |     |     |     |     |         |         |  |
| 991           | Water sampling | BCU  | 10  | Water            | Shower (Pre-flush)   | 90   |     |     |     |     |     |     |     |     |     |     |     |     |         |         |  |
| 966           | SP08           | BCU  | 10  | Water            | Shower (Unknown)     | 65   | R   | S   | S   | S   | I   | S   | S   | S   | S   | S   | S   | S   |         |         |  |
| 931           | P02            | BCU  | 8   | Environmental    | Shower (Rose)        | 49   | R   | S   | S   | S   | I   | S   | S   | S   | S   | S   | S   | S   |         |         |  |
| 1065          | SP30           | BCU  | 12  | Environmental    | Shower (Rose)        | 292  |     |     |     |     |     |     |     |     |     |     |     |     |         |         |  |
| 1034          | SP15           | BCU  | 8   | Environmental    | Shower (Rose)        | 176  | R   | S   | S   | S   | R   | S   | S   | S   | S   | S   | S   | S   | Yes     |         |  |
| 902           | P01            | BCU  | 11  | Environmental    | Drain                | 27   |     |     |     |     |     |     |     |     |     |     |     |     |         |         |  |
| 903           | P01            | BCU  | 11  | Water            | Shower (Post-flush)  | 27   | R   | S   | S   | S   | I   | S   | S   | S   | S   | S   | S   | S   |         |         |  |
| 981           | P04            | BCU  | 11  | Environmental    | Drain                | 89   | R   | S   | S   | S   | I   | S   | S   | S   | S   | S   | S   | S   |         |         |  |
| 980           | P04            | BCU  | 11  | Environmental    | Shower (Rose)        | 89   | R   | S   | S   | S   | I   | S   | S   | S   | S   | S   | S   | S   |         |         |  |
| 1048          | SP20           | BCU  | 11  | Environmental    | Shower (Rose)        | 216  | R   | S   | S   | S   | I   | S   | S   | S   | S   | S   | S   | S   |         |         |  |
| 901           | P01            | BCU  | 11  | Environmental    | Trolley              | 27   | R   | S   | S   | S   | I   | S   | S   | S   | S   | S   | S   | S   |         |         |  |
| 987           | P04            | BCU  | 11  | Water            | Shower (Hose)        | 89   | R   | S   | S   | S   | I   | S   | S   | S   | S   | S   | S   | S   |         |         |  |
| 1050          | SP21           | BCU  | 11  | Water            | Shower (Post-flush)  | 216  |     |     |     |     |     |     |     |     |     |     |     |     |         |         |  |
| 988           | P04            | BCU  | 11  | Water            | Shower (Pre-flush)   | 89   | R   | S   | S   | S   | I   | S   | S   | S   | S   | S   | S   | S   |         |         |  |
| 968           | SP10           | BCU  | 11  | Water            | Shower (Unknown)     | 65   | R   | S   | S   | S   | I   | S   | S   | S   | S   | S   | S   | S   |         |         |  |
| 900           | P01            | BCU  | 11  | Wound swab       | Groin                | 14   | R   | S   | S   | S   | I   | S   | S   | S   | S   | S   | S   | S   |         |         |  |
| 979           | P04            | BCU  | 11  | Wound swab       | Anterior right thigh | 53   | R   | S   | S   | S   | I   | S   | S   | S   | S   | S   | S   | S   |         |         |  |
| 1008          | P04            | BCU  | 11  | Wound swab       | Anterior right thigh | 103  | R   | S   | S   | S   | I   | S   | S   | S   | S   | S   | S   | S   |         |         |  |
| 976           | P04            | BCU  | 11  | Wound swab       | Anterior right shin  | 53   | R   | S   | S   | S   | I   | S   | S   | S   | S   | S   | S   | S   |         |         |  |
| 984           | P04            | BCU  | 11  | Wound swab       | Dorsum of left foot  | 85   | R   | S   | S   | S   | I   | R   | I   | S   | S   | S   | S   | S   |         |         |  |
| 983           | P04            | BCU  | 11  | Wound swab       | Dorsum of left foot  | 85   | R   | S   | S   | S   | I   | R   | I   | S   | S   | S   | S   | S   |         |         |  |
| 982           | P04            | BCU  | 11  | Wound swab       | Dorsum of left foot  | 85   | R   | S   | S   | S   | I   | S   | S   | S   | S   | S   | S   | S   |         |         |  |
| 1007          | P04            | BCU  | 11  | Wound swab       | Anterior right thigh | 93   | R   | S   | S   | S   | I   | R   | I   | S   | S   | S   | S   | S   |         |         |  |
| 1009          | P04            | BCU  | 11  | Wound swab       | Anterior right thigh | 103  | R   | S   | S   | S   | I   | S   | S   | S   | S   | S   | S   | S   |         |         |  |
| 1005          | P04            | BCU  | 11  | Wound swab       | Anterior right thigh | 91   | R   | S   | S   | S   | I   | R   | I   | S   | S   | S   | S   | S   |         |         |  |
| 1006          | P04            | BCU  | 11  | Wound swab       | Anterior right thigh | 91   | R   | S   | S   | S   | I   | R   | I   | S   | S   | S   | S   | S   |         |         |  |
| 1052          | SP22           | BCU  | 9   | Water            | Shower (Hose)        | 226  |     |     |     |     |     |     |     |     |     |     |     |     |         | Yes     |  |
| 993           | Water sampling | BCU  | 9   | Water            | Shower (Hose)        | 90   | R   | S   | S   | S   | I   | S   | S   | S   | S   | S   | S   | S   |         |         |  |
| 994           | Water sampling | BCU  | 9   | Water            | Shower (Pre-flush)   | 90   | R   | S   | S   | S   | I   | S   | S   | S   | S   | S   | S   | S   |         |         |  |
| 992           | Water sampling | BCU  | 9   | Water            | Tap                  | 90   | R   | S   | S   | S   | I   | S   | S   | S   | S   | S   | S   | S   |         |         |  |
| 985           | P04            | BCU  | 11  | Water            | Tap                  | 89   | R   | S   | S   | S   | I   | S   | S   | S   | S   | S   | S   | S   |         |         |  |
| 986           | P04            | BCU  | 11  | Water            | Tap                  | 89   |     |     |     |     |     |     |     |     |     |     |     |     |         |         |  |
| 967           | SP09           | BCU  | 9   | Water            | Shower (Unknown)     | 65   | R   | S   | S   | S   | I   | S   | S   | S   | S   | S   | S   | S   |         | Yes     |  |
| 1062          | SP29           | BCU  | 6   | Environmental    | Shower (Rose)        | 292  |     |     |     |     |     |     |     |     |     |     |     |     |         |         |  |
| 1058          | SP25           | BCU  | 6   | Environmental    | Shower (Rose)        | 278  |     |     |     |     |     |     |     |     |     |     |     |     |         |         |  |
| 1003          | Water sampling | BCU  | 6   | Water            | Shower (Hose)        | 91   |     |     |     |     |     |     |     |     |     |     |     |     |         |         |  |
| 1064          | SP29           | BCU  | 6   | Water            | Shower (Pre-flush)   | 292  |     |     |     |     |     |     |     |     |     |     |     |     |         |         |  |
| 1036          | SP15           | BCU  | 6   | Water            | Shower (Pre-flush)   | 177  |     |     |     |     |     |     |     |     |     |     |     |     |         |         |  |
| 1004          | Water sampling | BCU  | 6   | Water            | Shower (Pre-flush)   | 91   |     |     |     |     |     |     |     |     |     |     |     |     |         |         |  |
| 1057          | SP25           | BCU  | 6   | Water            | Shower (Pre-flush)   | 278  | R   | S   | S   | S   | I   | S   | S   | S   | S   | S   | S   | S   |         |         |  |
| 1041          | SP16           | BCU  | 6   | Water            | Shower (Pre-flush)   | 190  |     |     |     |     |     |     |     |     |     |     |     |     |         |         |  |
| 999           | Water sampling | BCU  | 1   | Water            | Shower (Hose)        | 91   |     |     |     |     |     |     |     |     |     |     |     |     |         |         |  |
| 1000          | Water sampling | BCU  | 1   | Water            | Shower (Pre-flush)   | 91   |     |     |     |     |     |     |     |     |     |     |     |     |         |         |  |
| 1010          | SP11           | BCU  | 8   | Environmental    | Sink                 | 113  | S   | S   | S   | S   | I   | S   | S   | S   | S   | S   | S   | S   | Yes     |         |  |
| 989           | Water sampling | BCU  | 12  | Water            | Shower (Hose)        | 89   | R   | S   | S   | S   | I   | S   | S   | S   | S   | S   | S   | S   |         |         |  |
| 990           | Water sampling | BCU  | 12  | Water            | Shower (Pre-flush)   | 89   | R   | S   | S   | S   | I   | S   | S   | S   | S   | S   | S   | S   |         |         |  |
| 1040          | SP16           | BCU  | 6   | Environmental    | Shower (Rose)        | 190  | R   | S   | S   | S   | I   | S   | S   | S   | S   | S   | S   | S   |         |         |  |
| 1031          | SP13           | BCU  | 8   | Water            | Shower (Hose)        | 155  |     |     |     |     |     |     |     |     |     |     |     |     |         | Yes     |  |
| 1001          | Water sampling | BCU  | 5   | Water            | Tap                  | 91   |     |     |     |     |     |     |     |     |     |     |     |     |         |         |  |
| 996           | Water sampling | BCU  | 7   | Water            | Shower (Pre-flush)   | 90   | R   | S   | S   | S   | I   | S   | S   | S   | S   | S   | S   | S   |         |         |  |
| 1029          | SP12           | BCU  | 8   | Environmental    | Drain                | 146  |     |     |     |     |     |     |     |     |     |     |     |     |         | Yes     |  |
| 933           | P02            | BCU  | 8   | Environmental    | EGC                  | 49   | R   | S   | S   | S   | I   | S   | S   | S   | S   | S   | S   | S   |         |         |  |
| 930           | P02            | BCU  | 8   | Environmental    | Shower (Rose)        | 49   | R   | S   | S   | S   | I   | R   | S   | S   | S   | S   | S   | S   |         |         |  |
| 1028          | SP12           | BCU  | 8   | Environmental    | Shower (Rose)        | 146  |     |     |     |     |     |     |     |     |     |     |     |     |         | Yes     |  |
| 942           | P02            | BCU  | 8   | Environmental    | Shower (Rose)        | 55   | R   | S   | S   | S   | I   | S   | S   | S   | S   | S   | S   | S   |         |         |  |
| 941           | P02            | BCU  | 8   | Environmental    | Shower (Rose)        | 55   | R   | S   | S   | S   | I   | S   | S   | S   | S   | S   | S   | S   |         |         |  |
| 917           | P02            | BCU  | 8   | Environmental    | Shower (Rose)        | 40   | S   | S   | S   | S   | I   | S   | S   | S   | S   | S   | S   | S   | Yes     |         |  |
| 916           | P02            | BCU  | 8   | Environmental    | Shower (Rose)        | 40   | S   | S   | S   | S   | I   | S   | S   | S   | S   | S   | S   | S   | Yes     |         |  |
| 934           | P02            | BCU  | 8   | Water            | Shower (Post-flush)  | 49   | S   | S   | S   | S   | I   | S   | S   | S   | S   | S   | S   | S   | Yes     |         |  |
| 1030          | SP12           | BCU  | 8   | Water            | Shower (post-flush)  | 146  |     |     |     |     |     |     |     |     |     |     |     |     |         | Yes     |  |
| 1035          | SP14           | BCU  | 8   | Water            | Shower (Post-flush)  | 176  |     |     |     |     |     |     |     |     |     |     |     |     |         | Yes     |  |
| 910           | P02            | BCU  | 8   | Water            | Shower (Post-flush)  | 40   | S   | S   | S   | S   | I   | S   | S   | S   | S   | S   | S   | S   | Yes     |         |  |
| 935           | P02            | BCU  | 8   | Water            | Shower (Pre-flush)   | 49   | R   | S   | S   | S   | I   | S   | S   | S   | S   | S   | S   | S   | Yes     |         |  |
| 1046          | SP19           | BCU  | 8   | Water            | Shower (Pre-flush)   | 203  |     |     |     |     |     |     |     |     |     |     |     |     |         |         |  |
| 943           | P02            | BCU  | 8   | Water            | Shower (Pre-flush)   | 55   | S   | S   | S   | S   | I   | S   | S   | S   | S   | S   | S   | S   | Yes     |         |  |

For peer review only - <http://bmjopen.bmj.com/site/about/guidelines.xhtml>

1 SNP/Indel

For peer review only - <http://bmjopen.bmj.com/site/about/guidelines.xhtml>

| Sample Number | Patient        | WCCB | Open | Bed | Type of Specimen | Site       | Days | TIM | PIP | TAZ | CAZ | AZT | IMI | MER | AMI | GEN | TOB | CIP | COL |
|---------------|----------------|------|------|-----|------------------|------------|------|-----|-----|-----|-----|-----|-----|-----|-----|-----|-----|-----|-----|
| 1069          | Water sampling | WCCB | 11   | 11  | Water            | Tap        | 301  | R   | S   | S   | S   | I   | R   | I   | S   | S   | S   | S   | S   |
| 1045          | SP20           | WCCB | 11   | 11  | Environmental    | Tap handle | 204  |     |     |     |     |     |     |     |     |     |     |     |     |
| 1047          | SP20           | WCCB | 11   | 11  | Water            | Tap        | 204  | R   | S   | S   | S   | I   | R   | I   | I   | R   | S   | S   | S   |
| 1049          | P05            | WCCB | 11   | 11  | Sputum           | Sputum     | 221  |     | I   | I   | S   | I   | I   | I   | I   | R   | S   | S   | S   |
| 1053          | P05            | WCCB | 11   | 11  | Water            | Tap        | 231  | R   | I   | I   | S   | I   | R   | S   | S   | S   | S   | S   | S   |
| 1054          | P05            | WCCB | 11   | 11  | Sputum           | Sputum     | 229  | R   | R   | R   | R   | R   | R   | R   | I   | R   | S   | I   | S   |
| 1056          | P05            | WCCB | 11   | 11  | Sputum           | Sputum     | 242  |     | R   | R   | R   | S   | R   | R   |     | S   | S   | R   | S   |

1 SNP/Indel

1  
2  
3  
4  
5  
6

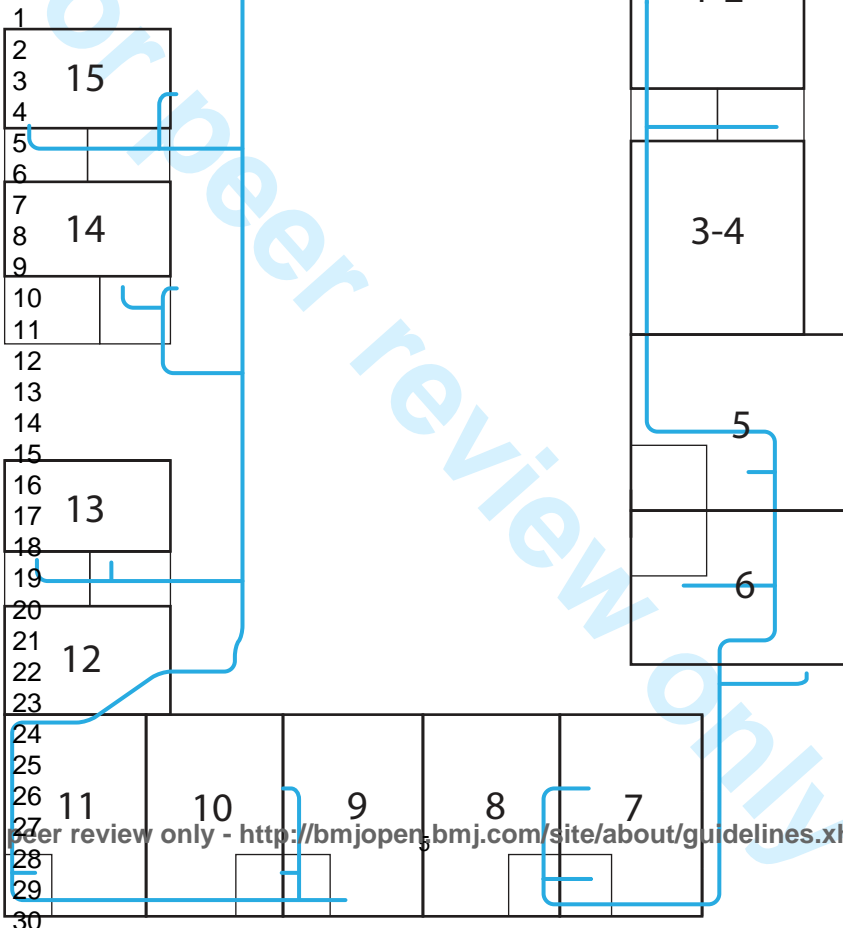

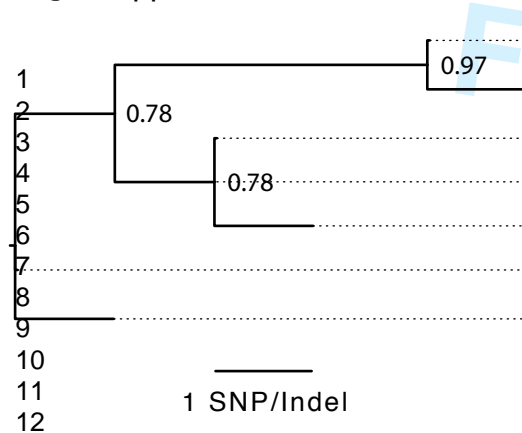

| Bed | Type of Specimen | Alignment                                                                                 |
|-----|------------------|-------------------------------------------------------------------------------------------|
| 11  | Shower           | T CCTACTCC - CACAGACCTAACCT - - - - - G - - ACCGAAATCCTTTTCCG - C GAGGCG                  |
| 11  | Shower           | T CCTACTCC - TACAGACCTAACCT - - - - - G - - ACCGAAATCCTTTTCCG - C GAGGCG                  |
| 9   | Tap              | T GCAACTCC - CACAGACCTAACGT - - - - - G - - ACCGAAATCCTTTTCCG - C GC GGCG                 |
| 9   | TMV              | T GCA - CT - C - CACAGA - - - AACGT - - - - - G - - ACCG - - A - CCTTTTC - G - C - - GGCG |
| 11  | Tap              | T GTA ACTCC - CACAGACCTAACGT - - - - - G - - ACCGAAATCCTTTTCCG - C GC GGCG                |
| 8   | Shower           | T CCAACTCC - CACAGACCTAACGT - - - - - G - - ACCGAAATCCTTTTCCG - C TC GGCG                 |
| 6   | Shower           | T CCAACTCC - CACAGCCTAACGT - - - - - G - - ACCGAAATCCTTTTCCG - C TC GGCG                  |





1  
2  
3  
4  
5  
6  
7  
8  
9  
10  
11  
12  
13  
14  
15  
16  
17  
18  
19  
20  
21  
22  
23  
24  
25  
26  
27  
28  
29  
30  
31  
32  
33  
34  
35  
36  
37  
38  
39  
40  
41  
42  
43  
44  
45  
46  
47

| Study | Year | Age   | Sex | Site | Study design | Outcome | Effect size | 95% CI  | Quality score | Notes |
|-------|------|-------|-----|------|--------------|---------|-------------|---------|---------------|-------|
| 1     | 2008 | 18-24 | M   | USA  | Case-control | MI      | 1.5         | 1.2-1.8 | 10            |       |
| 2     | 2009 | 18-24 | M   | USA  | Case-control | MI      | 1.2         | 1.0-1.4 | 10            |       |
| 3     | 2010 | 18-24 | M   | USA  | Case-control | MI      | 1.8         | 1.5-2.1 | 10            |       |
| 4     | 2011 | 18-24 | M   | USA  | Case-control | MI      | 1.4         | 1.1-1.7 | 10            |       |
| 5     | 2012 | 18-24 | M   | USA  | Case-control | MI      | 1.6         | 1.3-1.9 | 10            |       |
| 6     | 2013 | 18-24 | M   | USA  | Case-control | MI      | 1.3         | 1.0-1.6 | 10            |       |
| 7     | 2014 | 18-24 | M   | USA  | Case-control | MI      | 1.7         | 1.4-2.0 | 10            |       |
| 8     | 2015 | 18-24 | M   | USA  | Case-control | MI      | 1.5         | 1.2-1.8 | 10            |       |
| 9     | 2016 | 18-24 | M   | USA  | Case-control | MI      | 1.4         | 1.1-1.7 | 10            |       |
| 10    | 2017 | 18-24 | M   | USA  | Case-control | MI      | 1.6         | 1.3-1.9 | 10            |       |
| 11    | 2018 | 18-24 | M   | USA  | Case-control | MI      | 1.3         | 1.0-1.6 | 10            |       |
| 12    | 2019 | 18-24 | M   | USA  | Case-control | MI      | 1.7         | 1.4-2.0 | 10            |       |
| 13    | 2020 | 18-24 | M   | USA  | Case-control | MI      | 1.5         | 1.2-1.8 | 10            |       |
| 14    | 2021 | 18-24 | M   | USA  | Case-control | MI      | 1.4         | 1.1-1.7 | 10            |       |
| 15    | 2022 | 18-24 | M   | USA  | Case-control | MI      | 1.6         | 1.3-1.9 | 10            |       |
| 16    | 2023 | 18-24 | M   | USA  | Case-control | MI      | 1.3         | 1.0-1.6 | 10            |       |
| 17    | 2024 | 18-24 | M   | USA  | Case-control | MI      | 1.7         | 1.4-2.0 | 10            |       |
| 18    | 2025 | 18-24 | M   | USA  | Case-control | MI      | 1.5         | 1.2-1.8 | 10            |       |
| 19    | 2026 | 18-24 | M   | USA  | Case-control | MI      | 1.4         | 1.1-1.7 | 10            |       |
| 20    | 2027 | 18-24 | M   | USA  | Case-control | MI      | 1.6         | 1.3-1.9 | 10            |       |
| 21    | 2028 | 18-24 | M   | USA  | Case-control | MI      | 1.3         | 1.0-1.6 | 10            |       |
| 22    | 2029 | 18-24 | M   | USA  | Case-control | MI      | 1.7         | 1.4-2.0 | 10            |       |
| 23    | 2030 | 18-24 | M   | USA  | Case-control | MI      | 1.5         | 1.2-1.8 | 10            |       |
| 24    | 2031 | 18-24 | M   | USA  | Case-control | MI      | 1.4         | 1.1-1.7 | 10            |       |
| 25    | 2032 | 18-24 | M   | USA  | Case-control | MI      | 1.6         | 1.3-1.9 | 10            |       |
| 26    | 2033 | 18-24 | M   | USA  | Case-control | MI      | 1.3         | 1.0-1.6 | 10            |       |
| 27    | 2034 | 18-24 | M   | USA  | Case-control | MI      | 1.7         | 1.4-2.0 | 10            |       |
| 28    | 2035 | 18-24 | M   | USA  | Case-control | MI      | 1.5         | 1.2-1.8 | 10            |       |
| 29    | 2036 | 18-24 | M   | USA  | Case-control | MI      | 1.4         | 1.1-1.7 | 10            |       |
| 30    | 2037 | 18-24 | M   | USA  | Case-control | MI      | 1.6         | 1.3-1.9 | 10            |       |
| 31    | 2038 | 18-24 | M   | USA  | Case-control | MI      | 1.3         | 1.0-1.6 | 10            |       |
| 32    | 2039 | 18-24 | M   | USA  | Case-control | MI      | 1.7         | 1.4-2.0 | 10            |       |
| 33    | 2040 | 18-24 | M   | USA  | Case-control | MI      | 1.5         | 1.2-1.8 | 10            |       |
| 34    | 2041 | 18-24 | M   | USA  | Case-control | MI      | 1.4         | 1.1-1.7 | 10            |       |
| 35    | 2042 | 18-24 | M   | USA  | Case-control | MI      | 1.6         | 1.3-1.9 | 10            |       |
| 36    | 2043 | 18-24 | M   | USA  | Case-control | MI      | 1.3         | 1.0-1.6 | 10            |       |
| 37    | 2044 | 18-24 | M   | USA  | Case-control | MI      | 1.7         | 1.4-2.0 | 10            |       |
| 38    | 2045 | 18-24 | M   | USA  | Case-control | MI      | 1.5         | 1.2-1.8 | 10            |       |
| 39    | 2046 | 18-24 | M   | USA  | Case-control | MI      | 1.4         | 1.1-1.7 | 10            |       |
| 40    | 2047 | 18-24 | M   | USA  | Case-control | MI      | 1.6         | 1.3-1.9 | 10            |       |
| 41    | 2048 | 18-24 | M   | USA  | Case-control | MI      | 1.3         | 1.0-1.6 | 10            |       |
| 42    | 2049 | 18-24 | M   | USA  | Case-control | MI      | 1.7         | 1.4-2.0 | 10            |       |
| 43    | 2050 | 18-24 | M   | USA  | Case-control | MI      | 1.5         | 1.2-1.8 | 10            |       |
| 44    | 2051 | 18-24 | M   | USA  | Case-control | MI      | 1.4         | 1.1-1.7 | 10            |       |
| 45    | 2052 | 18-24 | M   | USA  | Case-control | MI      | 1.6         | 1.3-1.9 | 10            |       |
| 46    | 2053 | 18-24 | M   | USA  | Case-control | MI      | 1.3         | 1.0-1.6 | 10            |       |
| 47    | 2054 | 18-24 | M   | USA  | Case-control | MI      | 1.7         | 1.4-2.0 | 10            |       |

For peer review only

1  
2  
3  
4  
5  
6  
7  
8  
9  
10  
11  
12  
13  
14  
15  
16  
17  
18  
19  
20  
21  
22  
23  
24  
25  
26  
27  
28  
29  
30  
31  
32  
33  
34  
35  
36  
37  
38  
39  
40  
41  
42  
43  
44  
45  
46  
47

| Chromosome | Position | Ref | Alt | Mean depth | No calls | Hom calls | Het calls | Effect                | Effect impact | Functional class | Codon change | Amino acid change | Gene name | 1045 | 1047 | 1049 | 1053 | 1054 | 1056 | 1069 |  |
|------------|----------|-----|-----|------------|----------|-----------|-----------|-----------------------|---------------|------------------|--------------|-------------------|-----------|------|------|------|------|------|------|------|--|
| NC_002516  | 3558951  | G   | A   | 35         | 0        | 1         | 0         | NON_SYNONYMOUS_CODING | MODERATE      | MISSENSE         | aCc/aTc      | T83I              | gyrA      |      |      |      |      |      |      | A    |  |
| NC_002516  | 4166773  | A   | G   | 22         | 0        | 2         | 0         | NON_SYNONYMOUS_CODING | MODERATE      | MISSENSE         | Acg/Gcg      | T86A              | nalC      |      |      |      |      | G    |      | G    |  |

For peer review only



| Patient | Antibiotic/antifungal   | Start      | End        | Start      | End        |
|---------|-------------------------|------------|------------|------------|------------|
| 2       | Ciprofloxacin           | 16/10/2012 | 06/11/2012 |            |            |
|         | Nitrofurantoin          | 16/10/2012 | 11/11/2012 |            |            |
|         | Vancomycin              | 29/10/2012 | 03/11/2012 |            |            |
| 4       | Flucloxacillin          | 23/11/2012 | 30/11/2012 |            |            |
|         | Piperacillin/tazobactam | 30/11/2012 | 03/12/2012 |            |            |
|         | Meropenem               | 03/12/2012 | 08/12/2012 |            |            |
|         | Colistin                | 15/12/2012 | 21/12/2012 |            |            |
| 5       | Gentamycin              | 12/04/2013 | 12/04/2013 |            |            |
|         | Co-amoxiclav            | 13/04/2013 | 14/04/2013 |            |            |
|         | Erthromycin             | 14/04/2013 | 21/04/2013 | 11/05/2013 | 19/05/2013 |
|         | Piperacillin/tazobactam | 14/04/2013 | 18/04/2013 |            |            |
|         | Meropenem               | 20/04/2013 | 08/05/2013 | 19/05/2013 | 20/05/2013 |
|         | Caspofungin             | 26/04/2013 | 14/05/2013 | 20/05/2013 | 21/05/2013 |
|         | Linezolid               | 01/05/2013 | 12/05/2013 |            |            |
|         | Ciprofloxacin           | 06/05/2013 | 16/05/2013 | 20/05/2013 | 21/05/2013 |
|         | Colistin                | 20/05/2013 | 23/05/2013 |            |            |

1  
2  
3  
4  
5  
6  
7  
8  
9  
10  
11  
12  
13  
14  
15  
16  
17  
18  
19  
20  
21  
22  
23  
24  
25  
26  
27  
28  
29  
30  
31  
32  
33  
34  
35  
36  
37  
38  
39  
40  
41  
42  
43  
44  
45  
46  
47

| Gene | Mutation type | Effect         | AA substitution | Resistance phenotype | Samples                     |
|------|---------------|----------------|-----------------|----------------------|-----------------------------|
| gyrA | SNP           | non-synonymous | T83I            | Ciprofloxacin        | 1056                        |
| nalC | indel         | -              | -               | Meropenem            | 1054, 1056                  |
| mexS | SNP           | non-synonymous | H321Y           | Ciprofloxacin        | 908, 909, 919, 925-928, 932 |
| oprD | indel         | frame shift    | -400?           | Imipenem/meropenem   | 1005, 1006                  |

For peer review only

STROBE 2007 (v4) Statement—Checklist of items that should be included in reports of *cohort studies*

| Section/Topic                | Item # | Recommendation                                                                                                                                                                       | Reported on page # |
|------------------------------|--------|--------------------------------------------------------------------------------------------------------------------------------------------------------------------------------------|--------------------|
| Title and abstract           | 1      | (a) Indicate the study's design with a commonly used term in the title or the abstract                                                                                               | 3                  |
|                              |        | (b) Provide in the abstract an informative and balanced summary of what was done and what was found                                                                                  | 3-4                |
| <b>Introduction</b>          |        |                                                                                                                                                                                      |                    |
| Background/rationale         | 2      | Explain the scientific background and rationale for the investigation being reported                                                                                                 | 6                  |
| Objectives                   | 3      | State specific objectives, including any prespecified hypotheses                                                                                                                     | 7                  |
| <b>Methods</b>               |        |                                                                                                                                                                                      |                    |
| Study design                 | 4      | Present key elements of study design early in the paper                                                                                                                              | 8-9                |
| Setting                      | 5      | Describe the setting, locations, and relevant dates, including periods of recruitment, exposure, follow-up, and data collection                                                      | 8                  |
| Participants                 | 6      | (a) Give the eligibility criteria, and the sources and methods of selection of participants. Describe methods of follow-up                                                           | 8                  |
|                              |        | (b) For matched studies, give matching criteria and number of exposed and unexposed                                                                                                  | n/a                |
| Variables                    | 7      | Clearly define all outcomes, exposures, predictors, potential confounders, and effect modifiers. Give diagnostic criteria, if applicable                                             | 8-9                |
| Data sources/<br>measurement | 8*     | For each variable of interest, give sources of data and details of methods of assessment (measurement). Describe comparability of assessment methods if there is more than one group | 8-9                |
| Bias                         | 9      | Describe any efforts to address potential sources of bias                                                                                                                            | n/a                |
| Study size                   | 10     | Explain how the study size was arrived at                                                                                                                                            | 9                  |
| Quantitative variables       | 11     | Explain how quantitative variables were handled in the analyses. If applicable, describe which groupings were chosen and why                                                         | n/a                |
| Statistical methods          | 12     | (a) Describe all statistical methods, including those used to control for confounding                                                                                                | 11-13              |
|                              |        | (b) Describe any methods used to examine subgroups and interactions                                                                                                                  | n/a                |
|                              |        | (c) Explain how missing data were addressed                                                                                                                                          | n/a                |
|                              |        | (d) If applicable, explain how loss to follow-up was addressed                                                                                                                       | n/a                |
|                              |        | (e) Describe any sensitivity analyses                                                                                                                                                | n/a                |
| <b>Results</b>               |        |                                                                                                                                                                                      |                    |

|                          |     |                                                                                                                                                                                                              |       |
|--------------------------|-----|--------------------------------------------------------------------------------------------------------------------------------------------------------------------------------------------------------------|-------|
| Participants             | 13* | (a) Report numbers of individuals at each stage of study—eg numbers potentially eligible, examined for eligibility, confirmed eligible, included in the study, completing follow-up, and analysed            | 10    |
|                          |     | (b) Give reasons for non-participation at each stage                                                                                                                                                         | 10    |
|                          |     | (c) Consider use of a flow diagram                                                                                                                                                                           | -     |
| Descriptive data         | 14* | (a) Give characteristics of study participants (eg demographic, clinical, social) and information on exposures and potential confounders                                                                     | 10-11 |
|                          |     | (b) Indicate number of participants with missing data for each variable of interest                                                                                                                          | 10    |
|                          |     | (c) Summarise follow-up time (eg, average and total amount)                                                                                                                                                  | n/a   |
| Outcome data             | 15* | Report numbers of outcome events or summary measures over time                                                                                                                                               | 10-11 |
| Main results             | 16  | (a) Give unadjusted estimates and, if applicable, confounder-adjusted estimates and their precision (eg, 95% confidence interval). Make clear which confounders were adjusted for and why they were included | n/a   |
|                          |     | (b) Report category boundaries when continuous variables were categorized                                                                                                                                    | n/a   |
|                          |     | (c) If relevant, consider translating estimates of relative risk into absolute risk for a meaningful time period                                                                                             | n/a   |
| Other analyses           | 17  | Report other analyses done—eg analyses of subgroups and interactions, and sensitivity analyses                                                                                                               | n/a   |
| <b>Discussion</b>        |     |                                                                                                                                                                                                              |       |
| Key results              | 18  | Summarise key results with reference to study objectives                                                                                                                                                     | 16    |
| <b>Limitations</b>       |     |                                                                                                                                                                                                              |       |
| Interpretation           | 20  | Give a cautious overall interpretation of results considering objectives, limitations, multiplicity of analyses, results from similar studies, and other relevant evidence                                   | 16-18 |
| Generalisability         | 21  | Discuss the generalisability (external validity) of the study results                                                                                                                                        | 18    |
| <b>Other information</b> |     |                                                                                                                                                                                                              |       |
| Funding                  | 22  | Give the source of funding and the role of the funders for the present study and, if applicable, for the original study on which the present article is based                                                | 19    |

\*Give information separately for cases and controls in case-control studies and, if applicable, for exposed and unexposed groups in cohort and cross-sectional studies.

**Note:** An Explanation and Elaboration article discusses each checklist item and gives methodological background and published examples of transparent reporting. The STROBE checklist is best used in conjunction with this article (freely available on the Web sites of PLoS Medicine at <http://www.plosmedicine.org/>, Annals of Internal Medicine at <http://www.annals.org/>, and Epidemiology at <http://www.epidem.com/>). Information on the STROBE Initiative is available at [www.strobe-statement.org](http://www.strobe-statement.org).
